1           **The genomic landscape of metastatic castration-resistant prostate cancers using whole**  
2           **genome sequencing reveals multiple distinct genotypes with potential clinical impact**

3           Lisanne F. van Dessel<sup>1,a</sup>, Job van Riet<sup>2,3,a</sup>, Minke Smits<sup>4</sup>, Yanyun Zhu<sup>5,6</sup>, Paul Hamberg<sup>7</sup>, Michiel S.  
4           van der Heijden<sup>8,9,10</sup>, Andries M. Bergman<sup>5,10</sup>, Inge M. van Oort<sup>11</sup>, Ronald de Wit<sup>1</sup>, Emile E. Voest<sup>8, 10</sup>,  
5           Neeltje Steeghs<sup>8, 10</sup>, John W.M. Martens<sup>1,8</sup>, Stefan Sleijfer<sup>1,8</sup>, Edwin Cuppen<sup>12</sup>, Wilbert Zwart<sup>5,6,13</sup>,  
6           Harmen J.G. van de Werken<sup>2,3</sup>, Niven Mehra<sup>4,b</sup>, Martijn P. Lolkema<sup>1,8,b,\*</sup>

7           <sup>1</sup> Department of Medical Oncology, Erasmus MC Cancer Institute, University Medical Center Rotterdam, Dr. Molewaterplein 40, 3015 GD,  
8           Rotterdam, the Netherlands.

9           <sup>2</sup> Cancer Computational Biology Center, Erasmus MC Cancer Institute, University Medical Center Rotterdam, Dr. Molewaterplein 40, 3015 GD,  
10          Rotterdam, the Netherlands.

11          <sup>3</sup> Department of Urology, Erasmus MC Cancer Institute, University Medical Center Rotterdam, Dr. Molewaterplein 40, Rotterdam, the  
12          Netherlands.

13          <sup>4</sup> Department of Medical Oncology, Radboud University Nijmegen Medical Center, Geert Grooteplein Zuid 10 6525 GA Nijmegen, the  
14          Netherlands.

15          <sup>5</sup> Division on Oncogenomics, The Netherlands Cancer Institute, Plesmanlaan 121 1066 CX Amsterdam, the Netherlands

16          <sup>6</sup> Onco Institute, the Netherlands.

17          <sup>7</sup> Department of Internal Medicine, Franciscus Gasthuis & Vlietland, Kleiweg 500 3045 PM Rotterdam, the Netherlands.

18          <sup>8</sup> Center for Personalized Cancer Treatment, Rotterdam, the Netherlands.

19          <sup>9</sup> Division of Molecular Carcinogenesis, The Netherlands Cancer Institute, Plesmanlaan 121 1066 CX Amsterdam, the Netherlands.

20          <sup>10</sup> Department of Medical Oncology, The Netherlands Cancer Institute, Plesmanlaan 121 1066 CX Amsterdam, the Netherlands.

21          <sup>11</sup> Department of Urology, Radboud University Nijmegen Medical Center, Geert Grooteplein Zuid 10 6525 GA Nijmegen, the Netherlands.

22          <sup>12</sup> Center for Molecular Medicine and Onco Institute, University Medical Center Utrecht, Heidelberglaan 100, 3584 CX, Utrecht, the  
23          Netherlands.

24          <sup>13</sup> Laboratory of Chemical Biology and Institute for Complex Molecular Systems, Department of Biomedical Engineering, Eindhoven University of  
25          Technology, PO Box 513, Eindhoven

26          <sup>a,b</sup> These authors contributed equally

27          \* Corresponding author

28          **Address for correspondence:** Martijn P. Lolkema. Department of Medical Oncology, Erasmus MC  
29          Cancer Institute, Room NT-537, P.O. Box 2040, 3000 CA, Rotterdam, The Netherlands. Tel.: +31 10  
30          704 19 06. E-mail: [m.lolkema@erasmusmc.nl](mailto:m.lolkema@erasmusmc.nl)

31

32          **Keywords:** prostate cancer, metastasis, cancer genomics, homologous recombination deficiency

33

34 **Abstract**

35 Here we present whole-genome sequencing (WGS) analysis of fresh-frozen metastatic biopsies from  
36 197 castration-resistant prostate cancer patients. Using hierarchical unsupervised clustering based on  
37 genomic aberrations only, we defined eight different clusters. We detected four distinct and potentially  
38 clinically relevant genotypes harboring unique genomic features, including: 1) Microsatellite Instability;  
39 2) Homologous Recombination Deficiency (HRD) with enriched genomic deletions and *BRCA2*  
40 aberrations; 3) tandem duplication phenotype associated with biallelic *CDK12* mutations; and 4) a  
41 subgroup enriched for chromothripsis events. Our data suggest that classifying patients using WGS  
42 characteristics may improve classification of HRD patients. Moreover, we confirmed that important  
43 regulators of *AR*-mediated signaling are located in non-coding regions. Using ChIP sequencing data,  
44 we showed that the amplified *AR* and *MYC* promoter regions contain open chromatin and bind AR,  
45 suggesting a role in AR mediated biology. Thus, high-resolution WGS may be used to improve patient  
46 stratification.

47 **Main text**

48 Prostate cancer is known to be a notoriously heterogeneous disease and the genetic basis for  
49 this interpatient heterogeneity is poorly understood. The ongoing development of new therapies for  
50 metastatic prostate cancer that could potentially only be effective in molecularly defined subgroups,  
51 further increases the need for accurate patient classification and stratification<sup>1-3</sup>. Comprehensive  
52 genomic analyses in primary prostate cancer was able to classify 74% of analyzed patients into seven  
53 predefined subtypes based on ETS fusions and mutations in *SPOP*, *FOXA1* and *IDH1*<sup>4</sup>. More  
54 recently, whole-genome sequencing (WGS) of metastatic prostate cancer demonstrated that  
55 structural variations (SVs) arose from specific alterations such as *CDK12*<sup>-/-</sup> and *BRCA2*<sup>-/-</sup> genotypes<sup>5-</sup>  
56 <sup>7</sup>. As example, the predominance of tandem duplications was strongly associated with biallelic *CDK12*  
57 mutations. Thus, WGS enables the identification of patterns of DNA aberrations (i.e. ‘genomic scars’)  
58 that may profoundly improve classification of tumors that share a common etiology and that may be  
59 targeted using different therapies.

60 We analyzed fresh-frozen metastatic tumor samples and matched blood samples from 197  
61 castration-resistant prostate cancer (CRPC) patients using WGS generating to date the largest WGS  
62 dataset for mCRPC and combine it with AR ChipSeq data (**Figure 1a**). Clinical details on biopsy site,  
63 age and previous treatments of the included patients are described in **figure 1** and **supplementary**  
64 **table 2**. An overview of the sequencing quality is provided in **supplementary figure 1**. The median  
65 tumor mutational burden on coding regions (TMB) was 2.54/Mb in our mCRPC cohort; this is roughly  
66 twice as high as compared to primary prostate cancer and furthermore, 14 patients had high TMB  
67 (>10) ), which in other tumor types has been associated with a high sensitivity to check-point inhibitors  
68 (**supplementary figure 2**)<sup>8</sup>. We analyzed the somatic genomic aberrations and found a median of  
69 6621 single-nucleotide variants (SNVs; IQR: 5048-9109), 1008 small insertions and deletions (InDels;  
70 IQR: 739-1364), 55 multi-nucleotide variants (MNVs; IQR: 34-86) and 224 SVs (IQR: 149-370) per  
71 patient (**supplementary figure 3a-c**). We observed a highly complex genomic landscape consisting  
72 of multiple driver mutations and structural rearrangements in our cohort. We confirmed that known  
73 key driver genes of prostate cancer were enriched for nonsynonymous mutations, including, *TP53*,  
74 *AR*, *FOXA1*, *SPOP*, *RB1* and *PTEN* (**Figure 2** and **supplementary figure 3d-e**). Distinct amplified  
75 genomic regions included 8q, 10q and Xq; deleted regions affected 8p, 10q, 13q and 17p  
76 (**supplementary figure 3d**). In addition to large-scale chromosomal copy-number alterations, we

77 could also further pinpoint narrow genomic regions targeted with recurrent copy-number alterations  
78 which could potentially reveal important genes within or near the proximity of these events  
79 (**supplementary table 3**).

80 *TMPRSS2-ERG* gene fusions were the most common fusions in our cohort ( $n = 84$  (91.3% of  
81 all ETS fusions); **Figure 2** and **supplementary figure 4**) and is comparable to localized prostate  
82 cancer<sup>4,9</sup>. The predominant deletion site was located upstream of the second exon of *ERG*, which  
83 preserves its ETS domain in the resulting fusion gene. In 42 patients (21.3%) we observed regional  
84 hypermutation (“kataegis”) (**Figure 2** and **supplementary figure 5**); this seems to be comparable to  
85 kataegis rates in primary prostate cancer and thus is not an obvious driving force in metastatic  
86 progression<sup>9</sup>.

87 Several studies have shown that metastatic disease significantly differs from localized  
88 prostate cancer and that disease progression towards CRPC is mainly driven by increased androgen  
89 receptor signaling<sup>10,11</sup>. In-depth analysis of the AR-pathway revealed that aberrant AR signaling  
90 occurred in up to 80% of our patients. In 57.3% of patients both *AR* and the *AR*-enhancer (located  
91 about 631 kB upstream of the *AR* gene<sup>6</sup>) were affected (**Figure 3a**). In an additional 6.6% and 14.7%  
92 of patients only *AR* alterations or *AR*-enhancer amplification occurred, respectively. Concurrent  
93 amplification of *AR* and *AR*-enhancer was not necessarily of equal magnitude, which resulted in  
94 differences in copy number enrichment of these loci (**Figure 3b**). ChIP-seq data of two mCRPC  
95 patients and prostate cancer cell-lines (LNCaP and VCaP) revealed active enhancer regions  
96 (H3K27ac), coupled with actively bound *AR* and *FOXA1*, at the detected amplification peaks, which  
97 was found to be enriched in CRPC settings (**Figure 3c**). This indicates that *AR*-enhancer amplification  
98 could be associated with increased AR-signaling for this genomic region, which is supported by  
99 previous studies demonstrating that this amplification ultimately resulted in significantly elevated  
100 expression of *AR* itself<sup>6,7</sup>. Furthermore, a recurrent focal amplification at a non-coding area was  
101 observed at 8q24.21 near *PCAT1*. This locus bears similar epigenetic characteristics to the *AR*-  
102 enhancer with regard to H3K27ac and, to a lesser extent, binding of AR and/or FOXA1 (**Figure 3c**).  
103 This locus could represent a somatically-acquired putative enhancer affecting *MYC* expression  
104 (**Figure 3d**), however functional follow-up studies should be performed to further this hypothesis<sup>12</sup>. In  
105 addition, *PCAT1* is a long non-coding RNA which is known to be upregulated in prostate cancer and  
106 negatively regulates *BRCA2* expression while positively affecting *MYC* expression<sup>13,14</sup>. These data

107 show that most prostate cancers reactivate the AR pathway either directly or indirectly when  
108 progressing toward (m)CRPC.

109 Our comprehensive WGS data and sample size enabled us to perform unsupervised  
110 clustering to identify genomic scars that can define subgroups of mCRPC patients. We clustered our  
111 genomic data using total number of SVs, relative frequency of SV categories, TMB and tumor ploidy.  
112 This analysis defined eight distinct subgroups (**Figure 4-5** and **supplementary figure 6-8**): A)  
113 Microsatellite Instability (MSI) signature with high TMB and associated with mismatch repair  
114 deficiency; B) Tandem duplications (>100 kb) phenotype associated with biallelic *CDK12* inactivation;  
115 D) Homologous Recombination Deficiency (HRD) features with many (>100kb) deletions and  
116 association with (somatic) mutations in BRCAness-associated genes; F) chromothripsis; C, E, G, H);  
117 non-significant genomic signature without any currently known biological association. **Table 1**  
118 summarizes the key features of each subgroup. Cluster A and B represent previously identified  
119 genomic subgroups<sup>5,7,10,15</sup> and in both groups only a minority of the patients was allocated to these  
120 subgroups without a specific mutation in the corresponding genes. Interestingly, 2 out of 13 patients in  
121 cluster B (Tandem duplications (>100 kb) phenotype) did not show a bi-allelic (somatic) mutation in  
122 *CDK12*, suggesting that tandem duplications may arise in patient without *CDK12* mutations. Cluster D  
123 shows significant features of HRD, specifically biallelic *BRCA2* inactivation, mutational signature 3,  
124 enrichments of deletions (<100 kb) and is supported by high HR-deficiency scores (CHORD)<sup>16,17</sup>  
125 (**supplementary figure 6**). Although this is a known association<sup>7,18</sup>, our clustering analysis potentially  
126 refines patient classification, as 32% of this subgroup (7/22) does not have a defining biallelic *BRCA2*  
127 (somatic) mutation of which four of these patients show at least one (deleterious) aberration in other  
128 BRCAness-related genes<sup>19</sup>. In addition, 4 patients in other clusters show non-synonymous mutations  
129 in *BRCA2* without corresponding genomic scars, mutational signature and/or HR-deficiency scores  
130 (**figure 4, supplementary figure 9**). Only a single sample in cluster A harbored a *BRCA2* mutation  
131 with known pathogenic effect (p.T3030fs; RCV000031792)<sup>20</sup> and was identified with a HR-deficiency  
132 score which was clustered based on MSI-profile in our analysis. These patients might be deemed  
133 false-negative or false-positive when using FDA-approved assays (BRCAanalysis™ and  
134 FoundationFocus™) to predict response to poly(ADP-ribose) polymerase inhibitors (PARPi) or  
135 alkylating drugs like platinum compounds based on the presence of *BRCA* mutations. In cluster F, we  
136 detect significantly more chromothripsis events in comparison to the other clusters (80% vs 20%).

137 However, the overall frequency of chromothripsis (23.3%) was comparable with previous findings<sup>7,9</sup>.  
138 We failed to reproduce a previous finding suggesting chromothripsis to be associated with inversions  
139 and p53 inactivation in prostate cancer<sup>7</sup>. Apart from the chromothripsis events, no clear gene  
140 aberration was associated with this cluster. In the remaining patients, we could not identify a distinct  
141 genomic signature or biologic rationale (cluster C, E, G, H). In cluster C, conjoint aberrations of  
142 *BRCA1* and *TP53* were observed in one patient with a high HR-deficiency prediction score (CHORD),  
143 which is known to lead to a small tandem duplication phenotype (<100 kb)<sup>21</sup>. Two other patients within  
144 cluster C display a weak CHORD scoring associated with HR-deficiency, however no additional  
145 evidence was found for a *BRCA1* loss-of-function within these patients.

146 The classification of patients using WGS has the advantage of being, in theory, more precise  
147 and less prone to bias compared to analyses using targeted panels consisting of a limited number of  
148 genes. Overall, our study describes the complete genomic landscape of metastatic CRPC and  
149 confirms the central role of *AR* signaling in this disease. We identify distinct CRPC subgroups based  
150 on phenotypic characteristics encompassing genomic signatures, including MSI, BRCAness and  
151 *CDK12* inactivity, which may be clinically relevant.<sup>5,19</sup> Moreover, we show the added value of WGS-  
152 based unbiased clustering in identifying additional patients with genomic scars who are eligible for  
153 specific therapies and we could classify patients even if WGS (or our methodology) did not find  
154 conclusive evidence for a bi-allelic mutation in the proposed gene-of-interest.

155 This study also showed that a large population of mCRPC patients do not fall into an as-of-yet  
156 clinically-relevant or biologically-clear genotype and further research can help elucidate the oncogenic  
157 driver events and provide new therapeutic options. In addition, further analysis using whole-genome  
158 sequencing data allows us to gain more insight into the role of non-coding regions of the genome in  
159 prostate cancer.

160 **Methods**

161 Methods, including statements of data availability and any associated accession codes and  
162 references, are available in the supplementary information file.

163

164 **References**

- 165 1. Mullane, S. A. & Van Allen, E. M. Precision medicine for advanced prostate cancer. *Current*  
166 *Opinion in Urology* (2016). doi:10.1097/MOU.0000000000000278
- 167 2. Ciccicarese, C. *et al.* Prostate cancer heterogeneity: Discovering novel molecular targets for  
168 therapy. *Cancer Treatment Reviews* (2017). doi:10.1016/j.ctrv.2017.02.001
- 169 3. Shtivelman, E., Beer, T. M. & Evans, C. P. Molecular pathways and targets in prostate cancer.  
170 *Oncotarget* (2014). doi:10.18632/oncotarget.2406
- 171 4. Cancer Genome Atlas Research Network *et al.* The Molecular Taxonomy of Primary Prostate  
172 Cancer. *Cell* **163**, 1011–25 (2015).
- 173 5. Wu, Y.-M. *et al.* Inactivation of CDK12 Delineates a Distinct Immunogenic Class of Advanced  
174 Prostate Cancer Article Inactivation of CDK12 Delineates a Distinct Immunogenic Class of  
175 Advanced Prostate Cancer. *Cell* **173**, 1770–1782.e14 (2018).
- 176 6. Viswanathan, S. R. *et al.* Structural Alterations Driving Castration-Resistant Prostate Cancer  
177 Revealed by Linked-Read Genome Sequencing. *Cell* **174**, 433–447.e19 (2018).
- 178 7. Quigley, D. A. *et al.* Genomic Hallmarks and Structural Variation in Metastatic Prostate  
179 Cancer. *Cell* **174**, 758–769.e9 (2018).
- 180 8. Campbell, P. J. *et al.* Pan-cancer analysis of whole genomes. *bioRxiv* 162784 (2017).  
181 doi:10.1101/162784
- 182 9. Fraser, M. *et al.* Genomic hallmarks of localized, non-indolent prostate cancer. *Nature* **541**,  
183 359–364 (2017).
- 184 10. Robinson, D. *et al.* Integrative clinical genomics of advanced prostate cancer. *Cell* **161**, 1215–  
185 1228 (2015).
- 186 11. Grasso, C. S. *et al.* The mutational landscape of lethal castration-resistant prostate cancer.  
187 *Nature* **487**, 239–243 (2012).
- 188 12. Mazrooei, P. *et al.* Somatic Mutations and Risk-Variants Converge on Cis-Regulatory  
189 Elements to Reveal the Cancer Driver Transcription Regulators in Primary Prostate Tumors.

- 190            *SSRN Electron. J.* (2018). doi:10.2139/ssrn.3245213
- 191    13.    Prensner, J. R. *et al.* The Long Non-Coding RNA PCAT-1 Promotes Prostate Cancer Cell  
192            Proliferation through cMyc. *Neoplasia* **16**, 900–908 (2014).
- 193    14.    Prensner, J. R. *et al.* PCAT-1, a long noncoding RNA, regulates BRCA2 and controls  
194            homologous recombination in cancer. *Cancer Res.* **74**, 1651–1660 (2014).
- 195    15.    Pritchard, C. C. *et al.* Complex MSH2 and MSH6 mutations in hypermutated microsatellite  
196            unstable advanced prostate cancer. *Nat. Commun.* **5**, (2014).
- 197    16.    Nik-Zainal, S. *et al.* Landscape of somatic mutations in 560 breast cancer whole-genome  
198            sequences. *Nature* **534**, 47–54 (2016).
- 199    17.    Polak, P. *et al.* A mutational signature reveals alterations underlying deficient homologous  
200            recombination repair in breast cancer. *Nat. Genet.* (2017). doi:10.1038/ng.3934
- 201    18.    Davies, H. *et al.* HRDetect is a predictor of BRCA1 and BRCA2 deficiency based on  
202            mutational signatures. *Nat. Med.* **23**, 517–525 (2017).
- 203    19.    Lord, C. J. & Ashworth, A. BRCAness revisited. *Nat. Rev. Cancer* **16**, 110–120 (2016).
- 204    20.    Landrum, M. J. *et al.* ClinVar: Public archive of relationships among sequence variation and  
205            human phenotype. *Nucleic Acids Res.* **42**, (2014).
- 206    21.    Menghi, F. *et al.* The Tandem Duplicator Phenotype Is a Prevalent Genome-Wide Cancer  
207            Configuration Driven by Distinct Gene Mutations. *Cancer Cell* **34**, 197–210.e5 (2018).
- 208    22.    Priestley, P. *et al.* Pan-cancer whole genome analyses of metastatic solid tumors. *bioRxiv*  
209            415133 (2018). doi:10.1101/415133
- 210    23.    Broad Institute. Picard tools. <https://broadinstitute.github.io/picard/> (2016). Available at:  
211            <https://broadinstitute.github.io/picard/%5Cnhttp://broadinstitute.github.io/picard/>.
- 212    24.    Lek, M. *et al.* Analysis of protein-coding genetic variation in 60,706 humans. *Nature* **536**, 285–  
213            291 (2016).
- 214    25.    Casper, J. *et al.* The UCSC Genome Browser database: 2018 update. *Nucleic Acids Res.* **46**,  
215            D762–D769 (2018).
- 216    26.    Forbes, S. A. *et al.* COSMIC: Somatic cancer genetics at high-resolution. *Nucleic Acids Res.*  
217            **45**, D777–D783 (2017).
- 218    27.    Tamborero, D. *et al.* Cancer Genome Interpreter annotates the biological and clinical  
219            relevance of tumor alterations. *Genome Med.* **10**, 25 (2018).



- 220 28. Griffith, M. *et al.* CIViC is a community knowledgebase for expert crowdsourcing the clinical  
221 interpretation of variants in cancer. *Nat. Genet.* **49**, 170–174 (2017).
- 222 29. Martincorena, I. *et al.* Universal Patterns of Selection in Cancer and Somatic Tissues. *Cell*  
223 **171**, 1029–1041.e21 (2017).
- 224 30. Mermel, C. H. *et al.* GISTIC2.0 facilitates sensitive and confident localization of the targets of  
225 focal somatic copy-number alteration in human cancers. *Genome Biol.* **12**, R41 (2011).
- 226 31. Harrow, J. *et al.* GENCODE: The reference human genome annotation for the ENCODE  
227 project. *Genome Res.* **22**, 1760–1774 (2012).
- 228 32. Huber, W., Toedling, J. & Steinmetz, L. M. Transcript mapping with high-density  
229 oligonucleotide tiling arrays. *Bioinformatics* **22**, 1963–1970 (2006).
- 230 33. Gel, B. & Serra, E. karyoploteR: an R/Bioconductor package to plot customizable genomes  
231 displaying arbitrary data. *Bioinformatics* **33**, 3088–3090 (2017).
- 232 34. Blokzijl, F., Janssen, R., van Boxtel, R. & Cuppen, E. MutationalPatterns: Comprehensive  
233 genome-wide analysis of mutational processes. *Genome Med.* (2018). doi:10.1186/s13073-  
234 018-0539-0
- 235 35. Meijer, T. G. *et al.* Functional ex vivo assay reveals homologous recombination deficiency in  
236 breast cancer beyond BRCA gene defects. *Clin. Cancer Res.* (2018). doi:10.1158/1078-  
237 0432.CCR-18-0063
- 238 36. Alexandrov, L. B. *et al.* Signatures of mutational processes in human cancer. *Nature* **500**, 415–  
239 421 (2013).
- 240 37. Gaujoux, R. & Seoighe, C. A flexible R package for nonnegative matrix factorization. *BMC*  
241 *Bioinformatics* **11**, (2010).
- 242 38. Cortés-ciriano, I., Lee, J., Xi, R., Jain, D. & Jung, Y. L. Comprehensive analysis of  
243 chromothripsis in 2 , 658 human cancers using whole-genome sequencing. (2018).
- 244 39. Hahsler, M., Hornik, K. & Buchta, C. Getting Things in Order : An Introduction to the R  
245 Package seriation. *J. Stat. Softw.* **25**, 1–27 (2008).
- 246 40. Abhishek A. Singh, Karianne Schuurman, Ekaterina Nevedomskaya, Suzan Stelloo, Simon  
247 Linder, Marjolein Droog, Yongsoo Kim, Joyce Sanders, Henk van der Poel, Andries M  
248 Bergman, Lodewyk FA Wessels, W. Z. Optimized ChIP-seq method facilitates transcription  
249 factor profiling in human tumors. *Life Sci. Alliance* **In Press**,

- 250 41. Li, H. & Durbin, R. Fast and accurate short read alignment with Burrows-Wheeler transform.  
251 *Bioinformatics* **25**, 1754–1760 (2009).
- 252 42. Zhang, Y. *et al.* Model-based analysis of ChIP-Seq (MACS). *Genome Biol.* **9**, (2008).
- 253 43. Kumar, V. *et al.* Uniform, optimal signal processing of mapped deep-sequencing data. *Nat.*  
254 *Biotechnol.* **31**, 615–622 (2013).
- 255 44. Stelloo, S. *et al.* Endogenous androgen receptor proteomic profiling reveals genomic  
256 subcomplex involved in prostate tumorigenesis. *Oncogene* **37**, 313–322 (2018).

257

## 258 **Acknowledgements**

259 This publication and the underlying study have been made possible partly on the basis of the data  
260 that Hartwig Medical Foundation and the Center of Personalized Cancer Treatment (CPCT) have  
261 made available to the study. We would like to thank the local principal investigators of all contributing  
262 centers for their help with patient enrollment (listed in **supplementary table 1**). We would also like to  
263 thank Tesa M. Severson for her help with the computational analyses of the ChIP-seq data, Suzan  
264 Stelloo for providing ChIP-seq results on cell lines and Arne van Hoeck for providing the CHORD  
265 (HR-deficiency) prediction scores. In addition, we would like to thank the Barcode for Life foundation  
266 for making this research possible.

267

## 268 **Grants**

269 This work was supported in parts by a KWF-Alpe d’HuZes project [NKI 2014-7080], a grant from  
270 Astellas Pharma [Lolkema/NL-72-RG-11] and a Johnson & Johnson grant [212082PCR3014].

271

## 272 **Author contributions**

273 LFVD, JVR, MS, MPL and HJGVDW wrote the manuscript, which all authors critically reviewed. JVR  
274 and HJGVDW performed the bioinformatics analyses. LFVD, MPL and NM managed clinical data  
275 assessment. PW and WZ performed ChIP-seq experiments and data analyses. NM, MPL, PH, AMB,  
276 MSVDH, IMVO, and RDW are clinical contributors. MSVDH, EV, NS, JWMM and SS are part of the  
277 CPCT-02 study. EPJGC coordinated the sequencing of samples and contributed to the bioinformatics  
278 analyses.

279

280 **Competing interests**

281 All authors declare no competing interests.

282

283 **Additional information**

284 Supplementary information is available for this paper in the supplementary information file.

285 **FIGURE LEGENDS**

286 **Figure 1 - Overview of study design and patient cohort ( $n = 197$ ).**

287 (a) **Flowchart of patient inclusion.** From the CPCT-02 cohort, patients with metastatic prostate  
288 cancer were selected. Patients were excluded if data from metastatic samples were not  
289 available and if clinical data analysis showed that patients had hormone-sensitive or neuro-  
290 endocrine prostate cancer or unknown disease status at the time of analysis.

291 (b) **Overview of the biopsy sites.** Number of biopsies per metastatic site analyzed with WGS.

292 (c) **Age of patients at biopsy.** Bee-swarm boxplot with notch of the patient age distribution.

293

294 **Figure 2 - mCRPC remains a genetically heterogeneous disease but shows several recurrent**  
295 **somatic alterations in key genes affecting several oncogenic pathways.**

296 Based on dN/dS ( $q \leq 0.1$ ) and GISTIC2 focal peak ( $q \leq 0.1$ ) criteria, we show the genes and  
297 focal genomic foci which are most often recurrently mutated, amplified or deleted in our  
298 mCRPC cohort of 197 patients. The upper track (top bar plot) displays tumor mutational  
299 burden (TMB) per SNV, InDel and MNV category on coding regions (square root scale).  
300 Samples are sorted based on mutual-exclusivity of the depicted genes and foci. The heatmap  
301 displays the type of mutation(s) per sample, (light-)green or (light-)red backgrounds depict  
302 copy-number aberrations whilst the inner square depicts the type of (coding) mutation(s).  
303 Relative proportions of mutational categories (coding mutations (SNV, InDels and MNV), SV,  
304 deep gains (high-level amplifications resulting in many additional copies) and deep deletions  
305 (high-level losses resulting in (near) homozygous losses) per gene and foci are shown in the  
306 barplot next to the heatmap. Narrow GISTIC2 peaks covering  $\leq 3$  genes were reduced to  
307 gene-level rows if one of these genes is present in the dN/dS ( $q \leq 0.1$ ) analysis or is a known  
308 oncogene or tumor-suppressor. For GISTIC2 peaks covering multiple genes, only deep  
309 amplifications and deep deletions are shown. Recurrent aberrant focal genomic foci in gene  
310 deserts are annotated with their nearest gene. Significance scores ( $-1 * \log_{10}(q)$ ) of the dN/dS  
311 and GISTIC2 analysis are shown on the outer-right barplots; bars in the GISTIC2 significance  
312 plot are colored red if these foci were detected as a recurrent focal deletion and green if  
313 detected as a recurrent focal gain. Per sample, the presence of (predicted) ETS fusions,

314 kataegis, chromothripsis, CHORD predictive score (HR-deficiency), MSI status and biopsy  
315 location are shown as bottom tracks

316

317 **Figure 3 - Whole Genome Sequencing reveals novel insight into the various molecular (non-**  
318 **coding) aberrations affecting AR regulation.**

319 (a) Mutational overview of top recurrently-mutated genes affecting AR regulation and their  
320 putative enhancer foci (as detected by GISTIC2). The first track represents the number of  
321 genomic mutations per Mb (TMB) per SNV, InDels and MNV category (square root scale).  
322 Samples are sorted based on mutual-exclusivity of the depicted genes and foci. The heatmap  
323 displays the type of mutation(s) per sample, (light-)green or (light-)red backgrounds depict  
324 copy-number aberrations whilst the inner square depicts the type of (coding) mutation(s).  
325 Relative proportions of mutational categories (coding mutations (SNV, InDels and MNV), SV,  
326 deep gains and deep deletions) per gene and foci are shown in the barplot next to the  
327 heatmap. The presence of (predicted) ETS fusions, kataegis, chromothripsis, CHORD  
328 predictive score (HR-deficiency), MSI status and biopsy location are shown as bottom tracks.

329 (b) Overview of the copy-number deviations between putative enhancer and gene regions for *AR*  
330 and *MYC*. Samples were categorized as enhancer- or gene-enriched if enhancer-to-gene  
331 ratio deviated  $>1$  studentized residual (residual derived from a linear model without the  
332 respective observation) from a 1:1 ratio.

333 (c) Copy-number and ChIP-seq profiles surrounding the *AR* and *PCAT1/MYC* gene loci (with  
334 1.25 additional Mb up-/downstream). The upper track displays the selected genomic window  
335 and the overlapping genes. The first and second track display the aggregated mean copy-  
336 number (per 1000bp window) of the enhancer- and gene-enriched samples, respectively.  
337 These profiles identify distinct amplified regions (indicated by red asterisk) in proximity to the  
338 respective gene bodies. The 3<sup>th</sup> to 8<sup>th</sup> tracks represent AR ChIP-seq profiles (mean read-  
339 coverage per 1Mb windows) in two mCRPC patients, LNCaP and LNCaP with R1881  
340 treatment, VCaP and bicalutamide-resistant VCaP. The 9<sup>th</sup> to 11<sup>th</sup> tracks represent FOXA1  
341 ChIP-seq profiles (mean read-coverage per 1Mb windows) in two mCRPC patients and  
342 LNCaP with R1881 treatment. The 12<sup>th</sup> to 14<sup>th</sup> tracks represent H3K27ac ChIP-seq profiles

343 (mean read-coverage per 1Mb windows) in two mCRPC patients and LNCaP with R1881  
344 treatment reflecting active enhancer regions.  
345 ChIP-seq peaks (MACS/MACS2;  $q < 0.01$ ) are shown as black lines per respective sample.

346

347 **Figure 4 - Unsupervised clustering of mCRPC reveals distinct genomic phenotypes.**

348 **(a) Dendrogram of unsupervised clustering (Pearson correlation; ward.D) with optimal leaf**  
349 **ordering.** Top eight clusters are highlighted and denoted based on order of appearance (left  
350 to right): A to H. Y-axis displays clustering distance (Pearson; ward.D).

351 **(b) Number of genomic mutations per Mb (TMB) of SNV, InDels and MNV categories.** All  
352 genome-wide somatic mutations were taken into consideration (square root scale).

353 **(c) Absolute number of unique structural variants per sample.** Cumulative frequency of  
354 inversions, tandem duplication, deletions, insertions and translocations.

355 **(d) Relative frequency per structural variant category, Tandem Duplications and Deletions**  
356 **are subdivided into >100kb and <100kb categories.** This track shows if an enrichment for  
357 particular category of (somatic) structural variant can be detected, which in turn, can be  
358 indicative for a specific mutational aberration.

359 **(e) Relative genome-wide ploidy status, ranging from 0 to  $\geq 7$  copies.** This track shows the  
360 relative percentage of the entire genome which is (partially) lost (ploidy  $< 2$ /diploid) or  
361 amplified ( $> 2$ /diploid).

362 **(f) Relative contribution to mutational signatures (COSMIC) summarized per proposed**  
363 **etiology.** This track displays the proposed etiology of each SNV based on their mutational  
364 contexts.

365 **(g) Relative frequency of SNV mutational changes.**

366 **(h) HR-deficient prediction score as assessed by CHORD.** The binary prediction score of  
367 CHORD (ranging from 0 to 1) is shown, in which higher scores reflect more evidence for HR-  
368 deficiency in a given sample.

369 **(i) MSI status as determined using a stringent threshold of MSI characteristics<sup>22</sup>.**

370

371 **Figure 5 - Distinct molecular phenotypes in mCRPC are enriched by mutually-exclusive**  
372 **aberrations in key pathways or large-scale somatic events.**

373 (a) **Cluster-specific enrichment of mutated genes, chromothripsis, gene fusions and**  
374 **kataegis (Fisher's Exact Test  $\leq 0.05$ ).** Percentages to the left of the black line represent the  
375 relative mutational frequency in mCRPC samples which are not present in the respective  
376 cluster, whilst the percentages to the right of the black line represent the relative mutational  
377 frequency present in the samples from the tested cluster.

378 (b) **Genomic overview with biologically-relevant genes in the clusters with mutational**  
379 **enrichment of genes or large-scale events (A, B, D and F).** The first track represents the  
380 number of genomic mutations per Mb (TMB) per SNV, InDels and MNV category (square-root  
381 scale). The second track represents the absolute number of unique structural variants per  
382 sample. The third track represents the relative frequency per structural variant category,  
383 Tandem Duplications and Deletions are subdivided into >100kb and <100kb categories. The  
384 fourth track represents relative genome-wide ploidy status, ranging from 0 to  $\geq 7$  copies. The  
385 fifth track represents the relative contribution to mutational signatures (COSMIC) summarized  
386 per proposed etiology. The sixth track displays somatic mutations in the relevant genes found  
387 in at least one cluster. The lower tracks represent presence of ETS fusions, chromothripsis,  
388 kataegis, HR-deficiency prediction scores and MSI status based on a threshold of MSI  
389 characteristics.

390

391 **Table 1 – Cluster characteristics**

392 Overview of the distinctive characteristics for each cluster (A-H).

**a**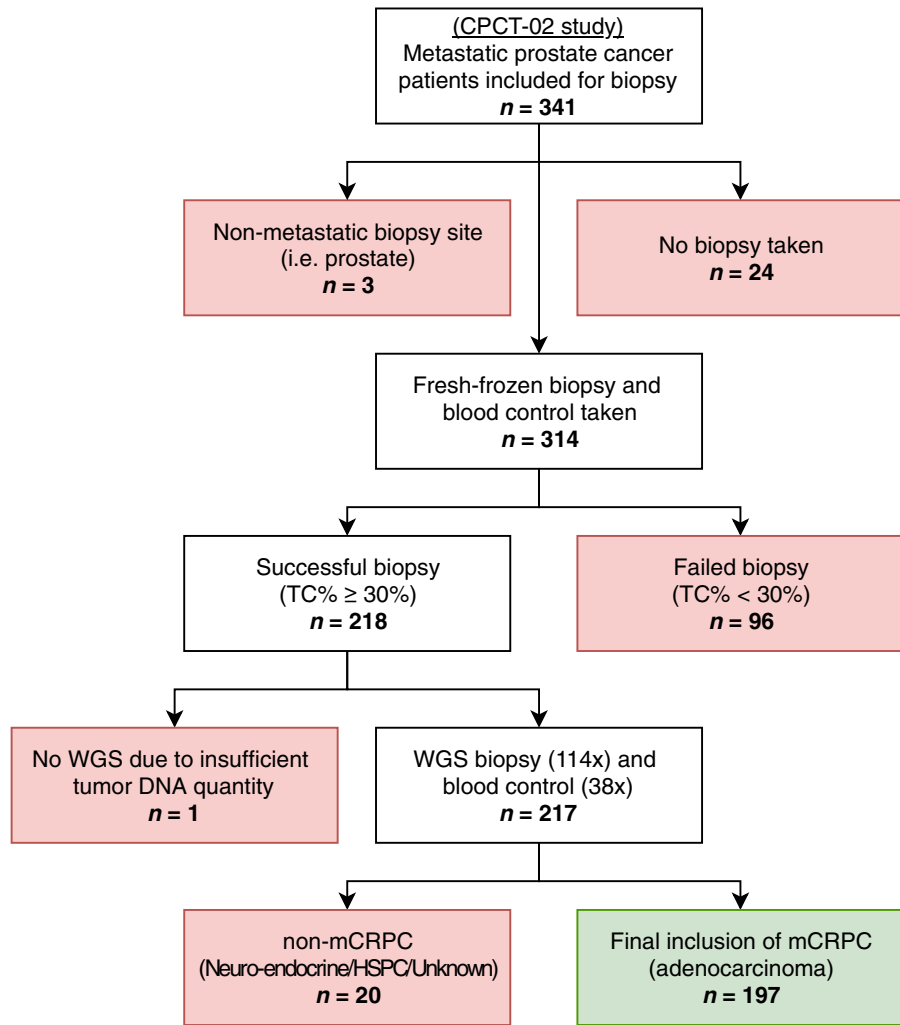**b**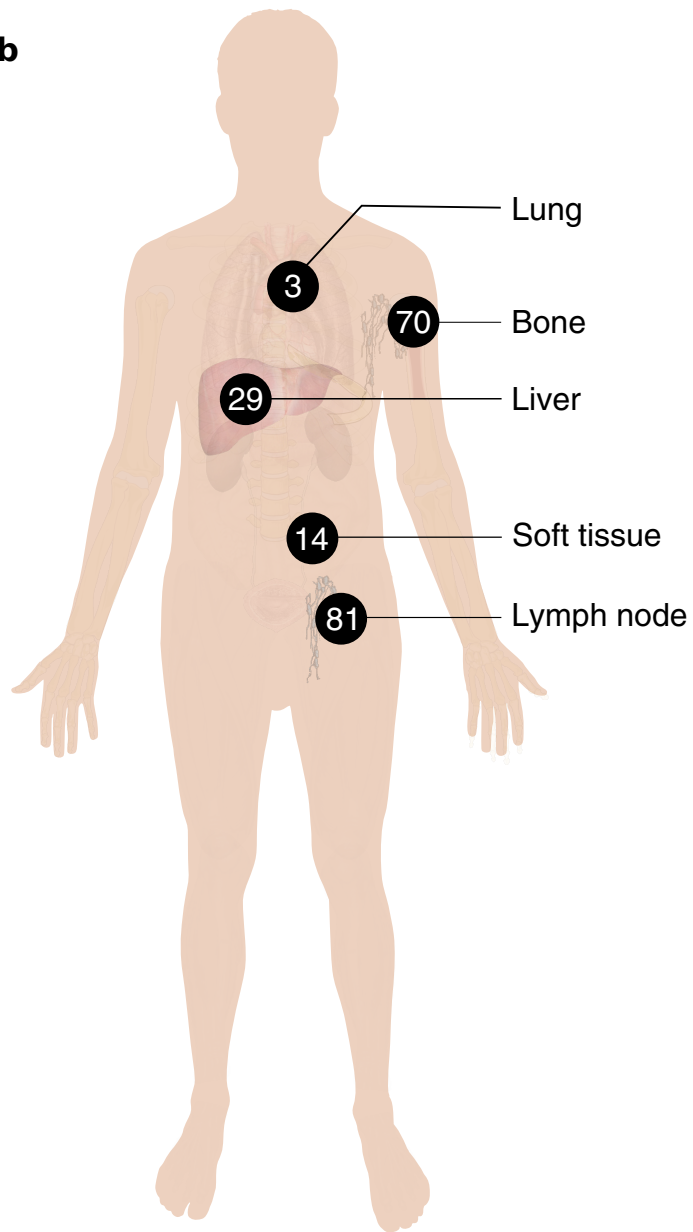**c**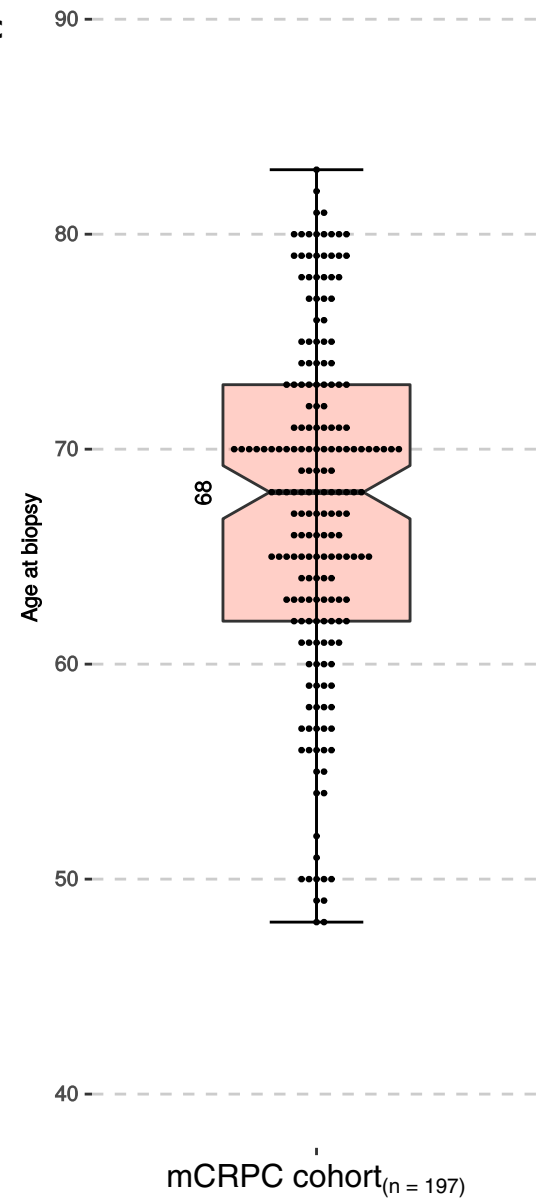



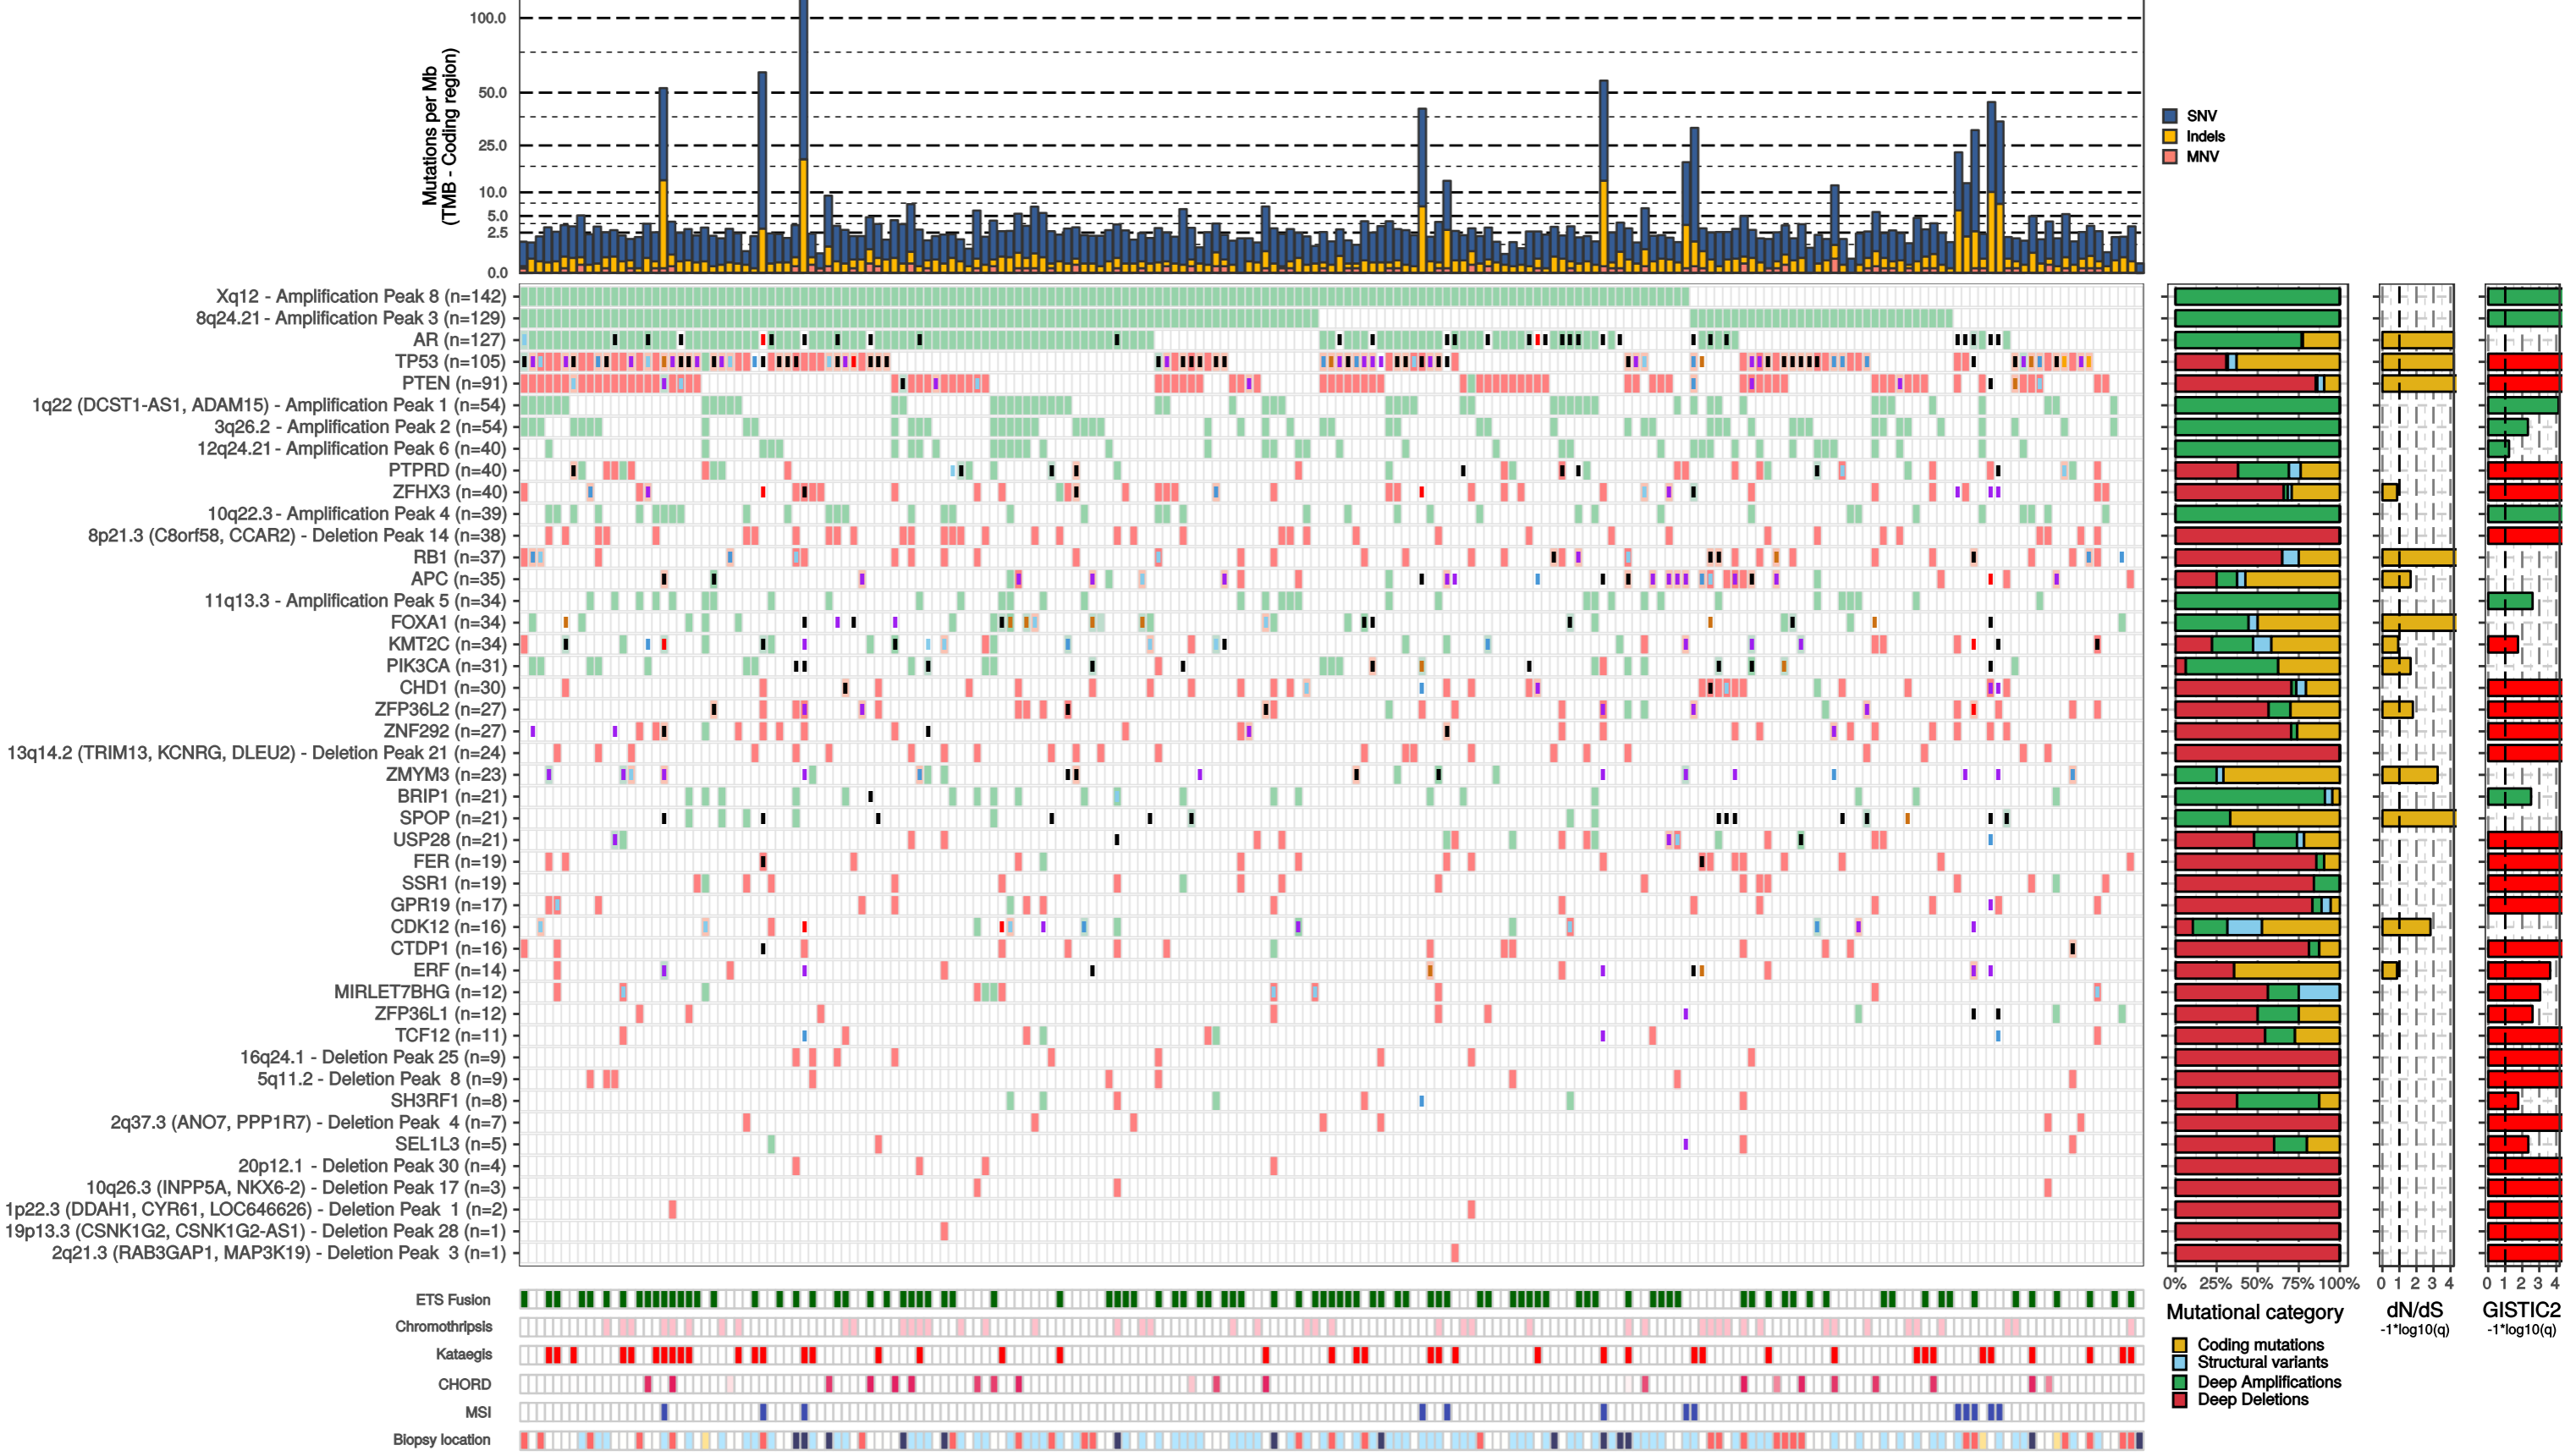

**Biopsy Location**

- Bone
- Liver
- Lung
- Lymph node
- Soft tissue

**Mutational Categories**

- Frameshift Variant
- Inframe Insertion/Deletion
- Deep Deletion
- Deep Gain
- Missense Variant
- Structural Variant
- Shallow Deletion
- Shallow Gain
- Stop Gained
- Splice Region Variant
- Multiple Mutations

**CHORD Prediction Score**

0 .25 .5 .75 1

a

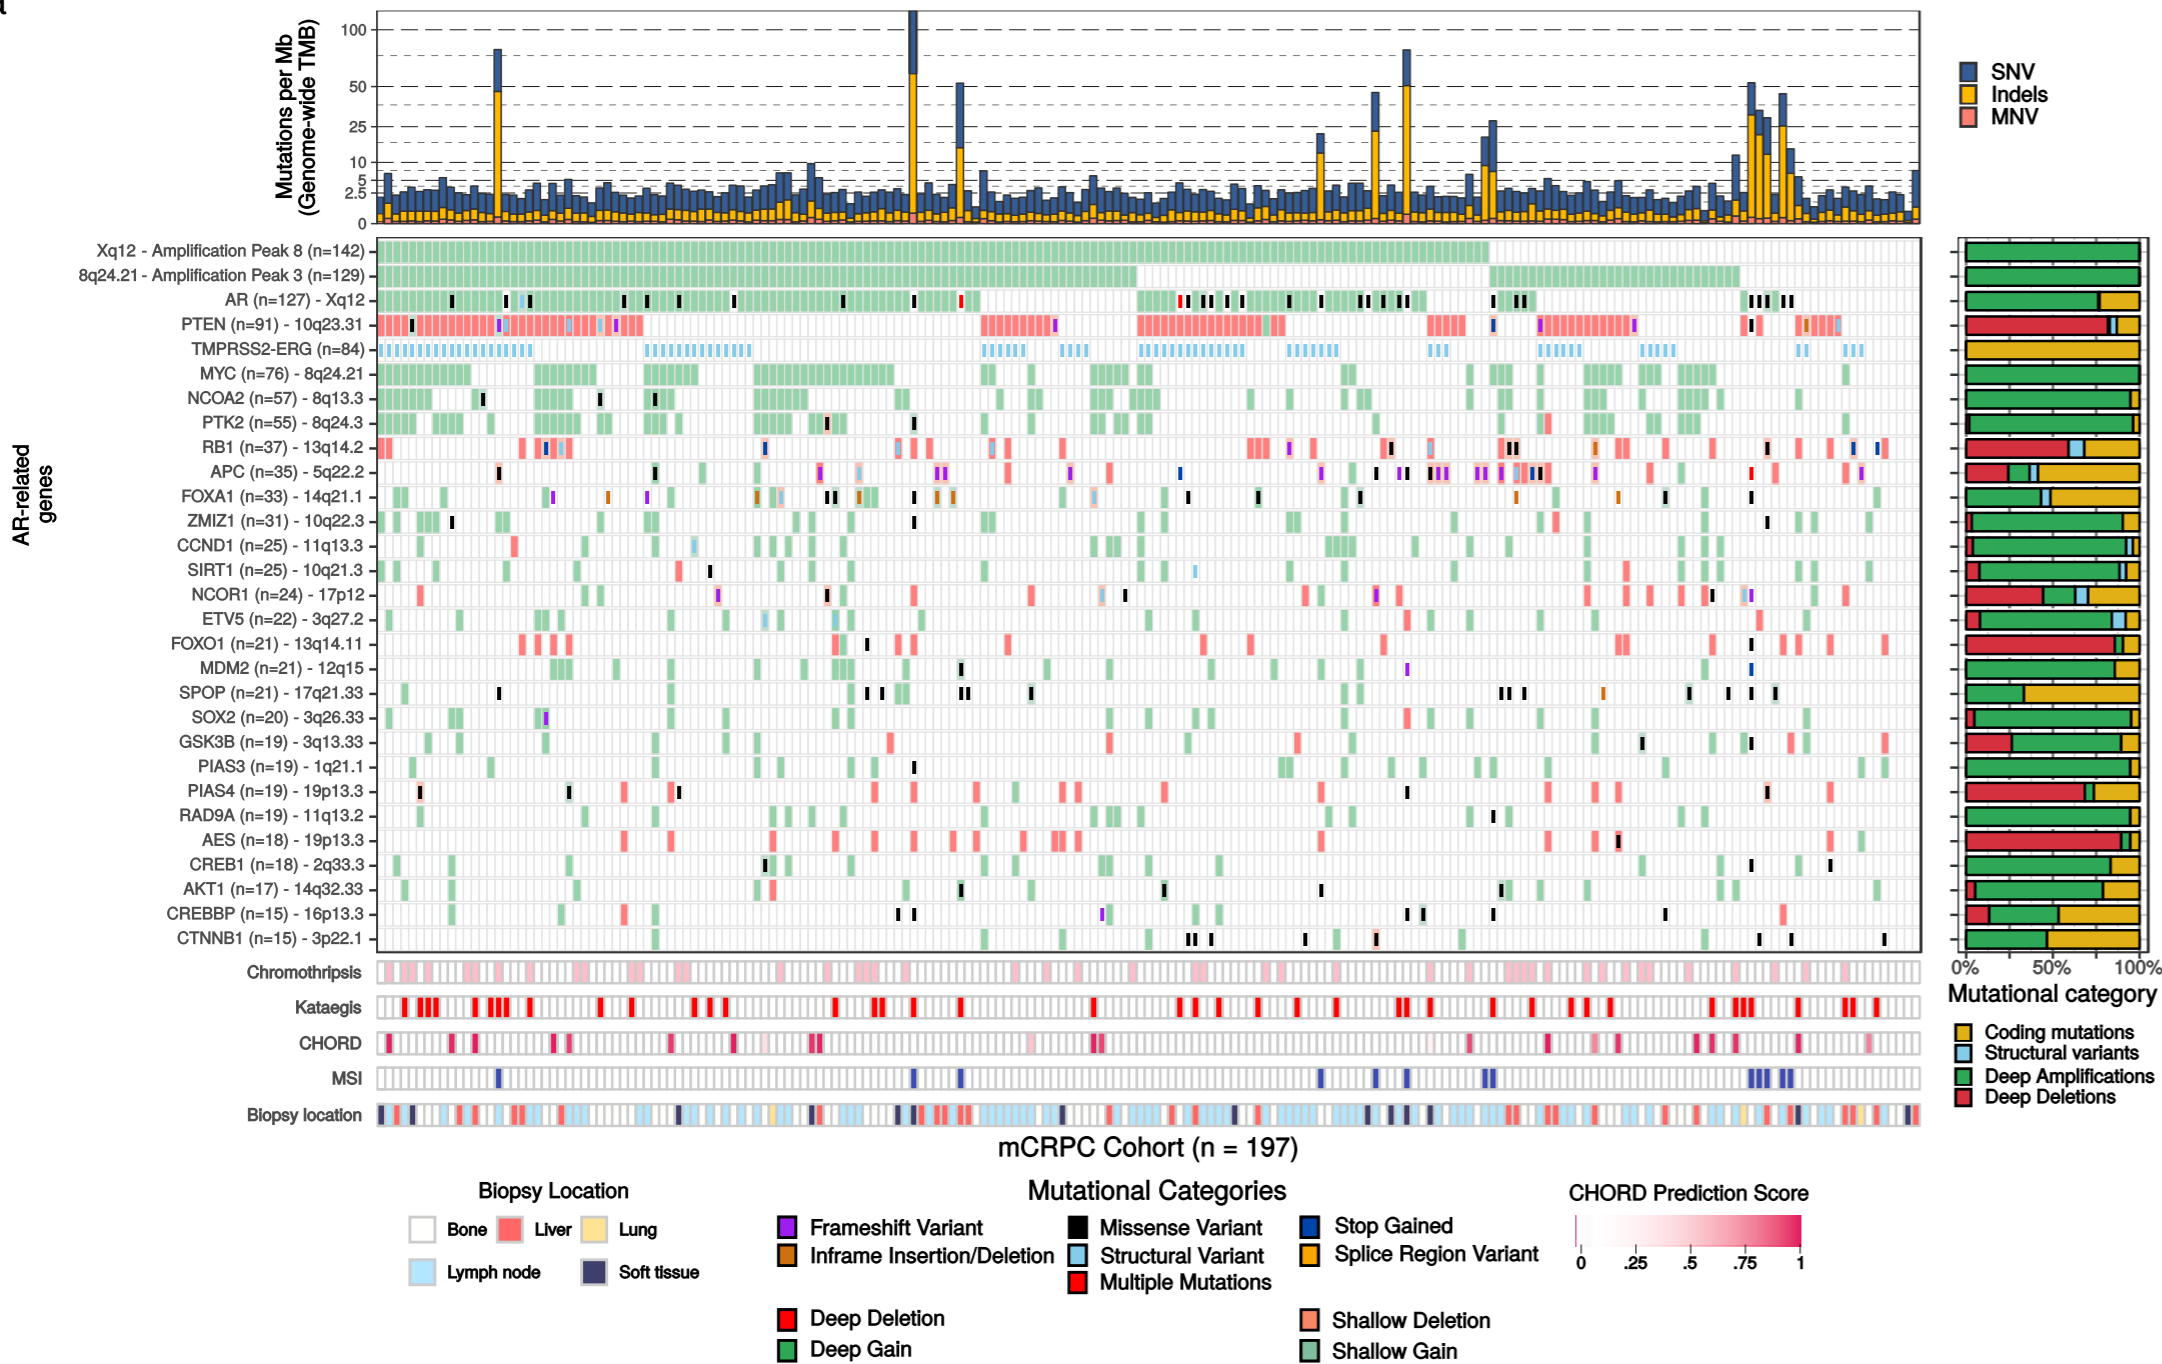

b

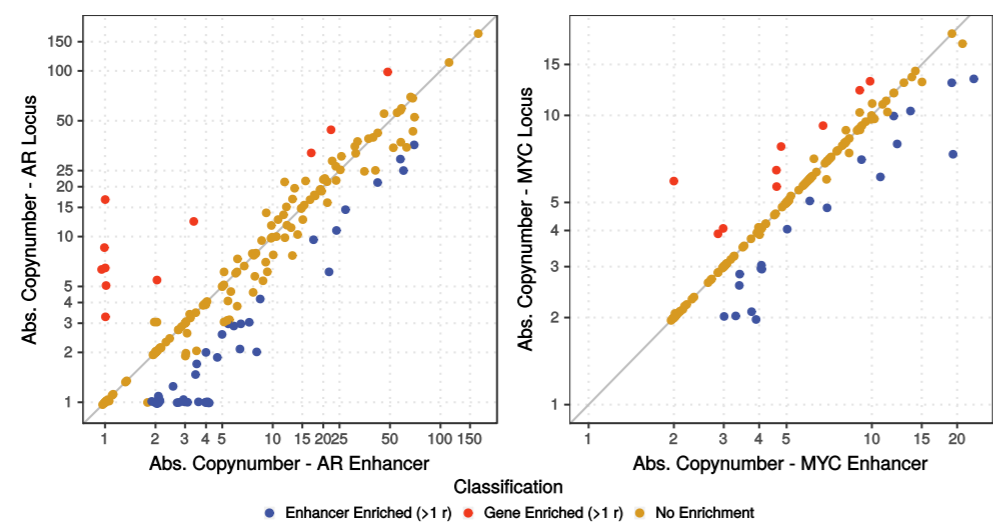

c

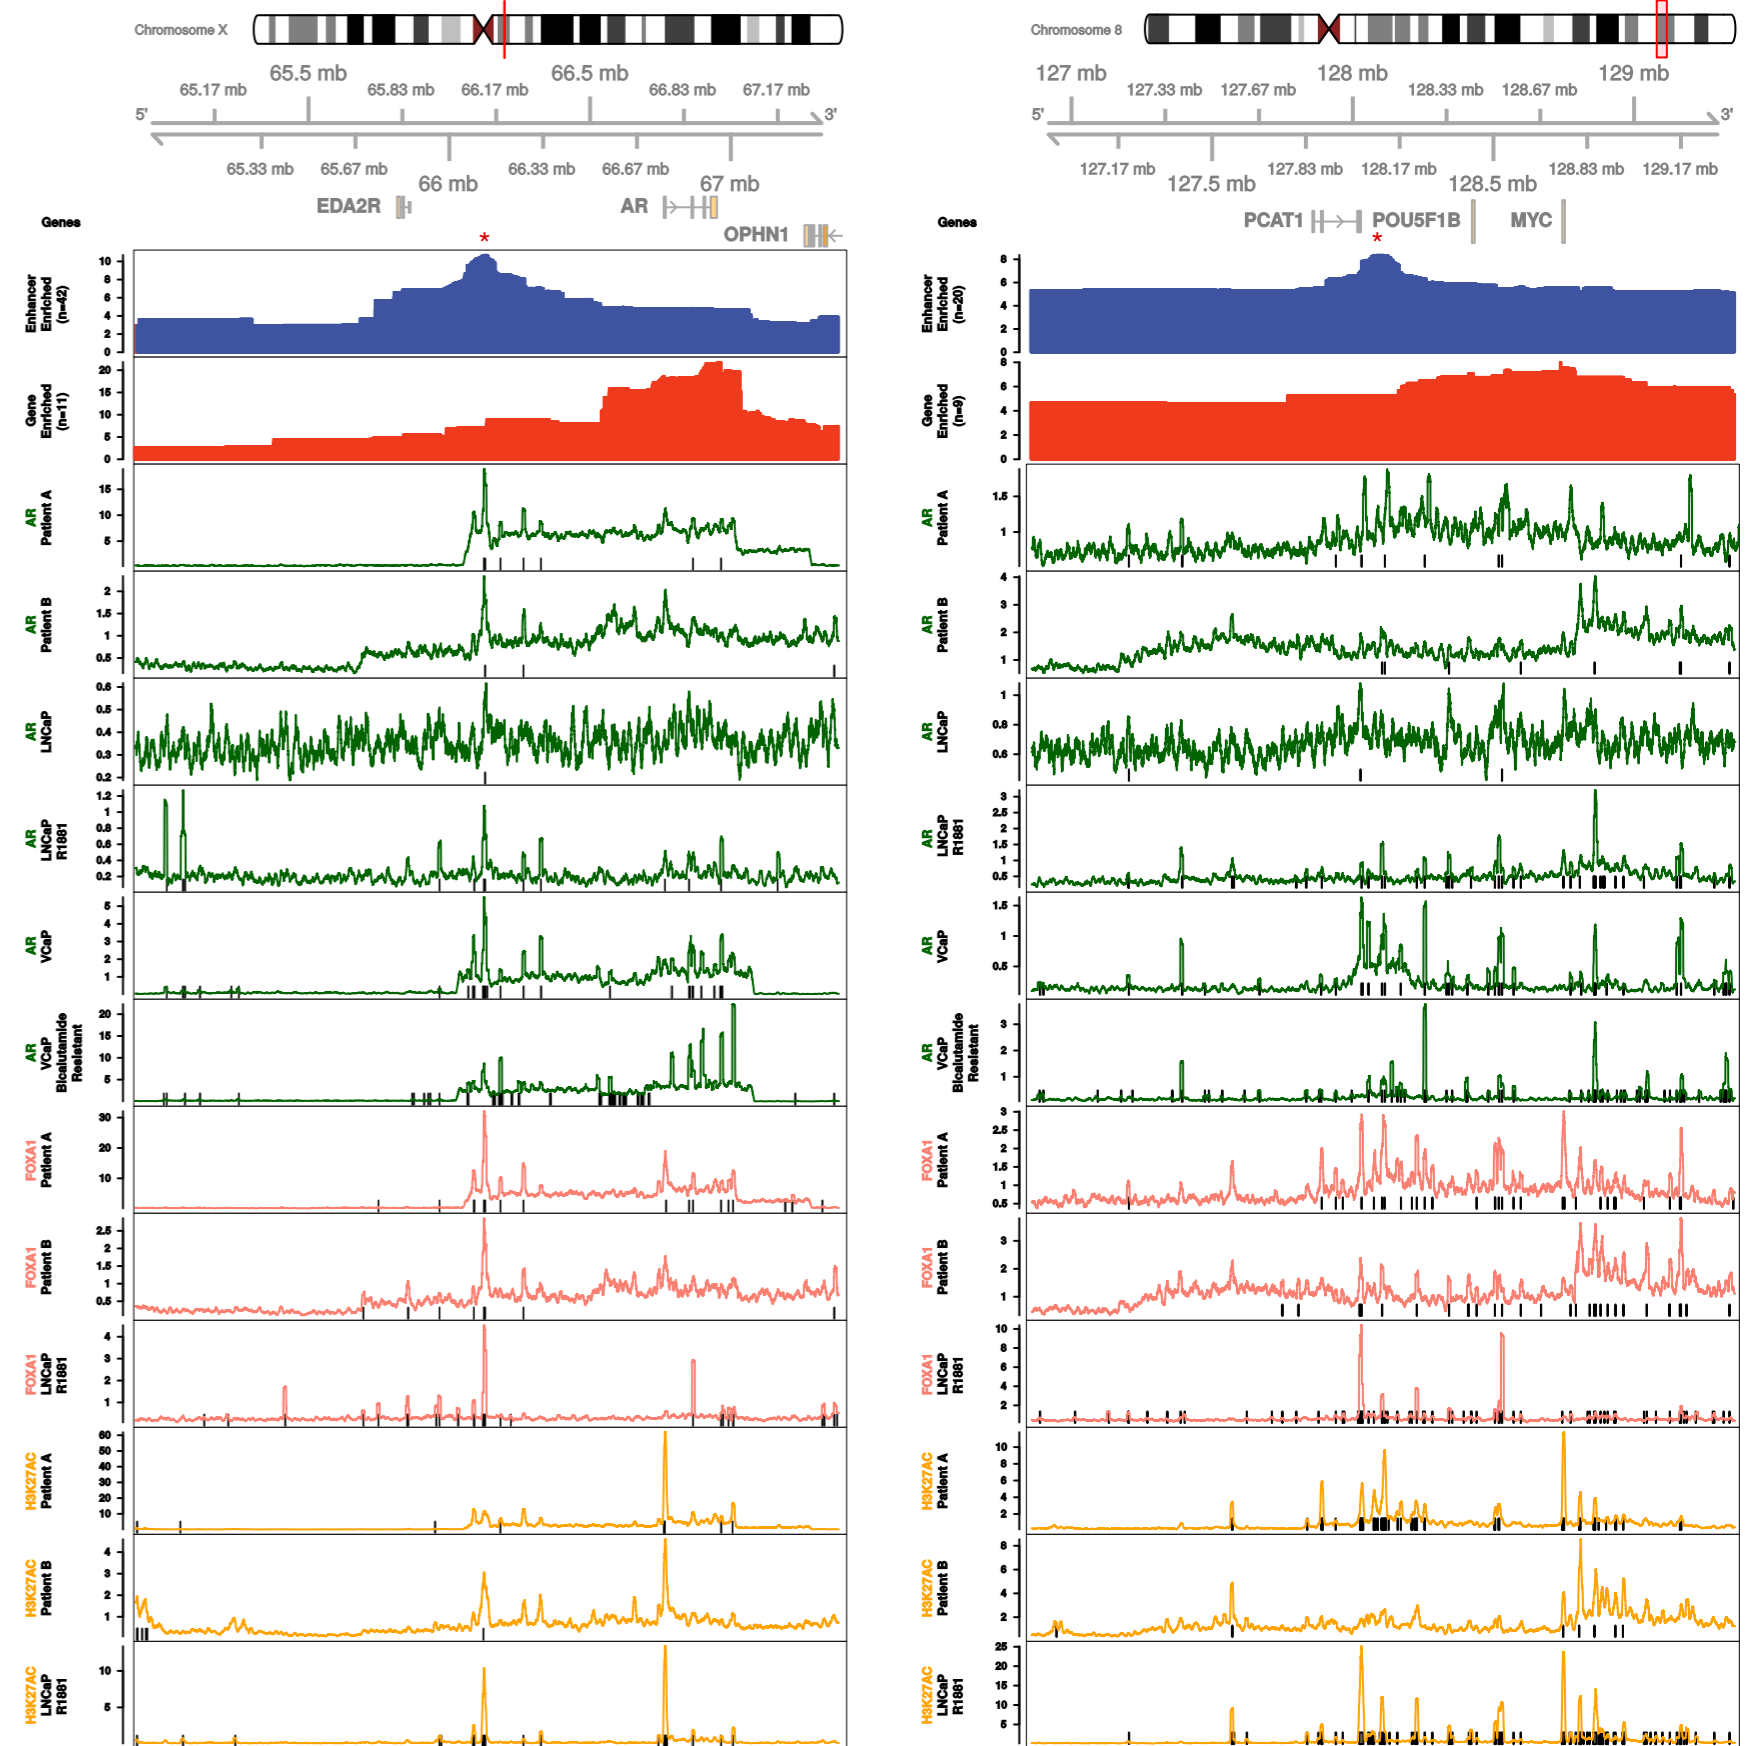

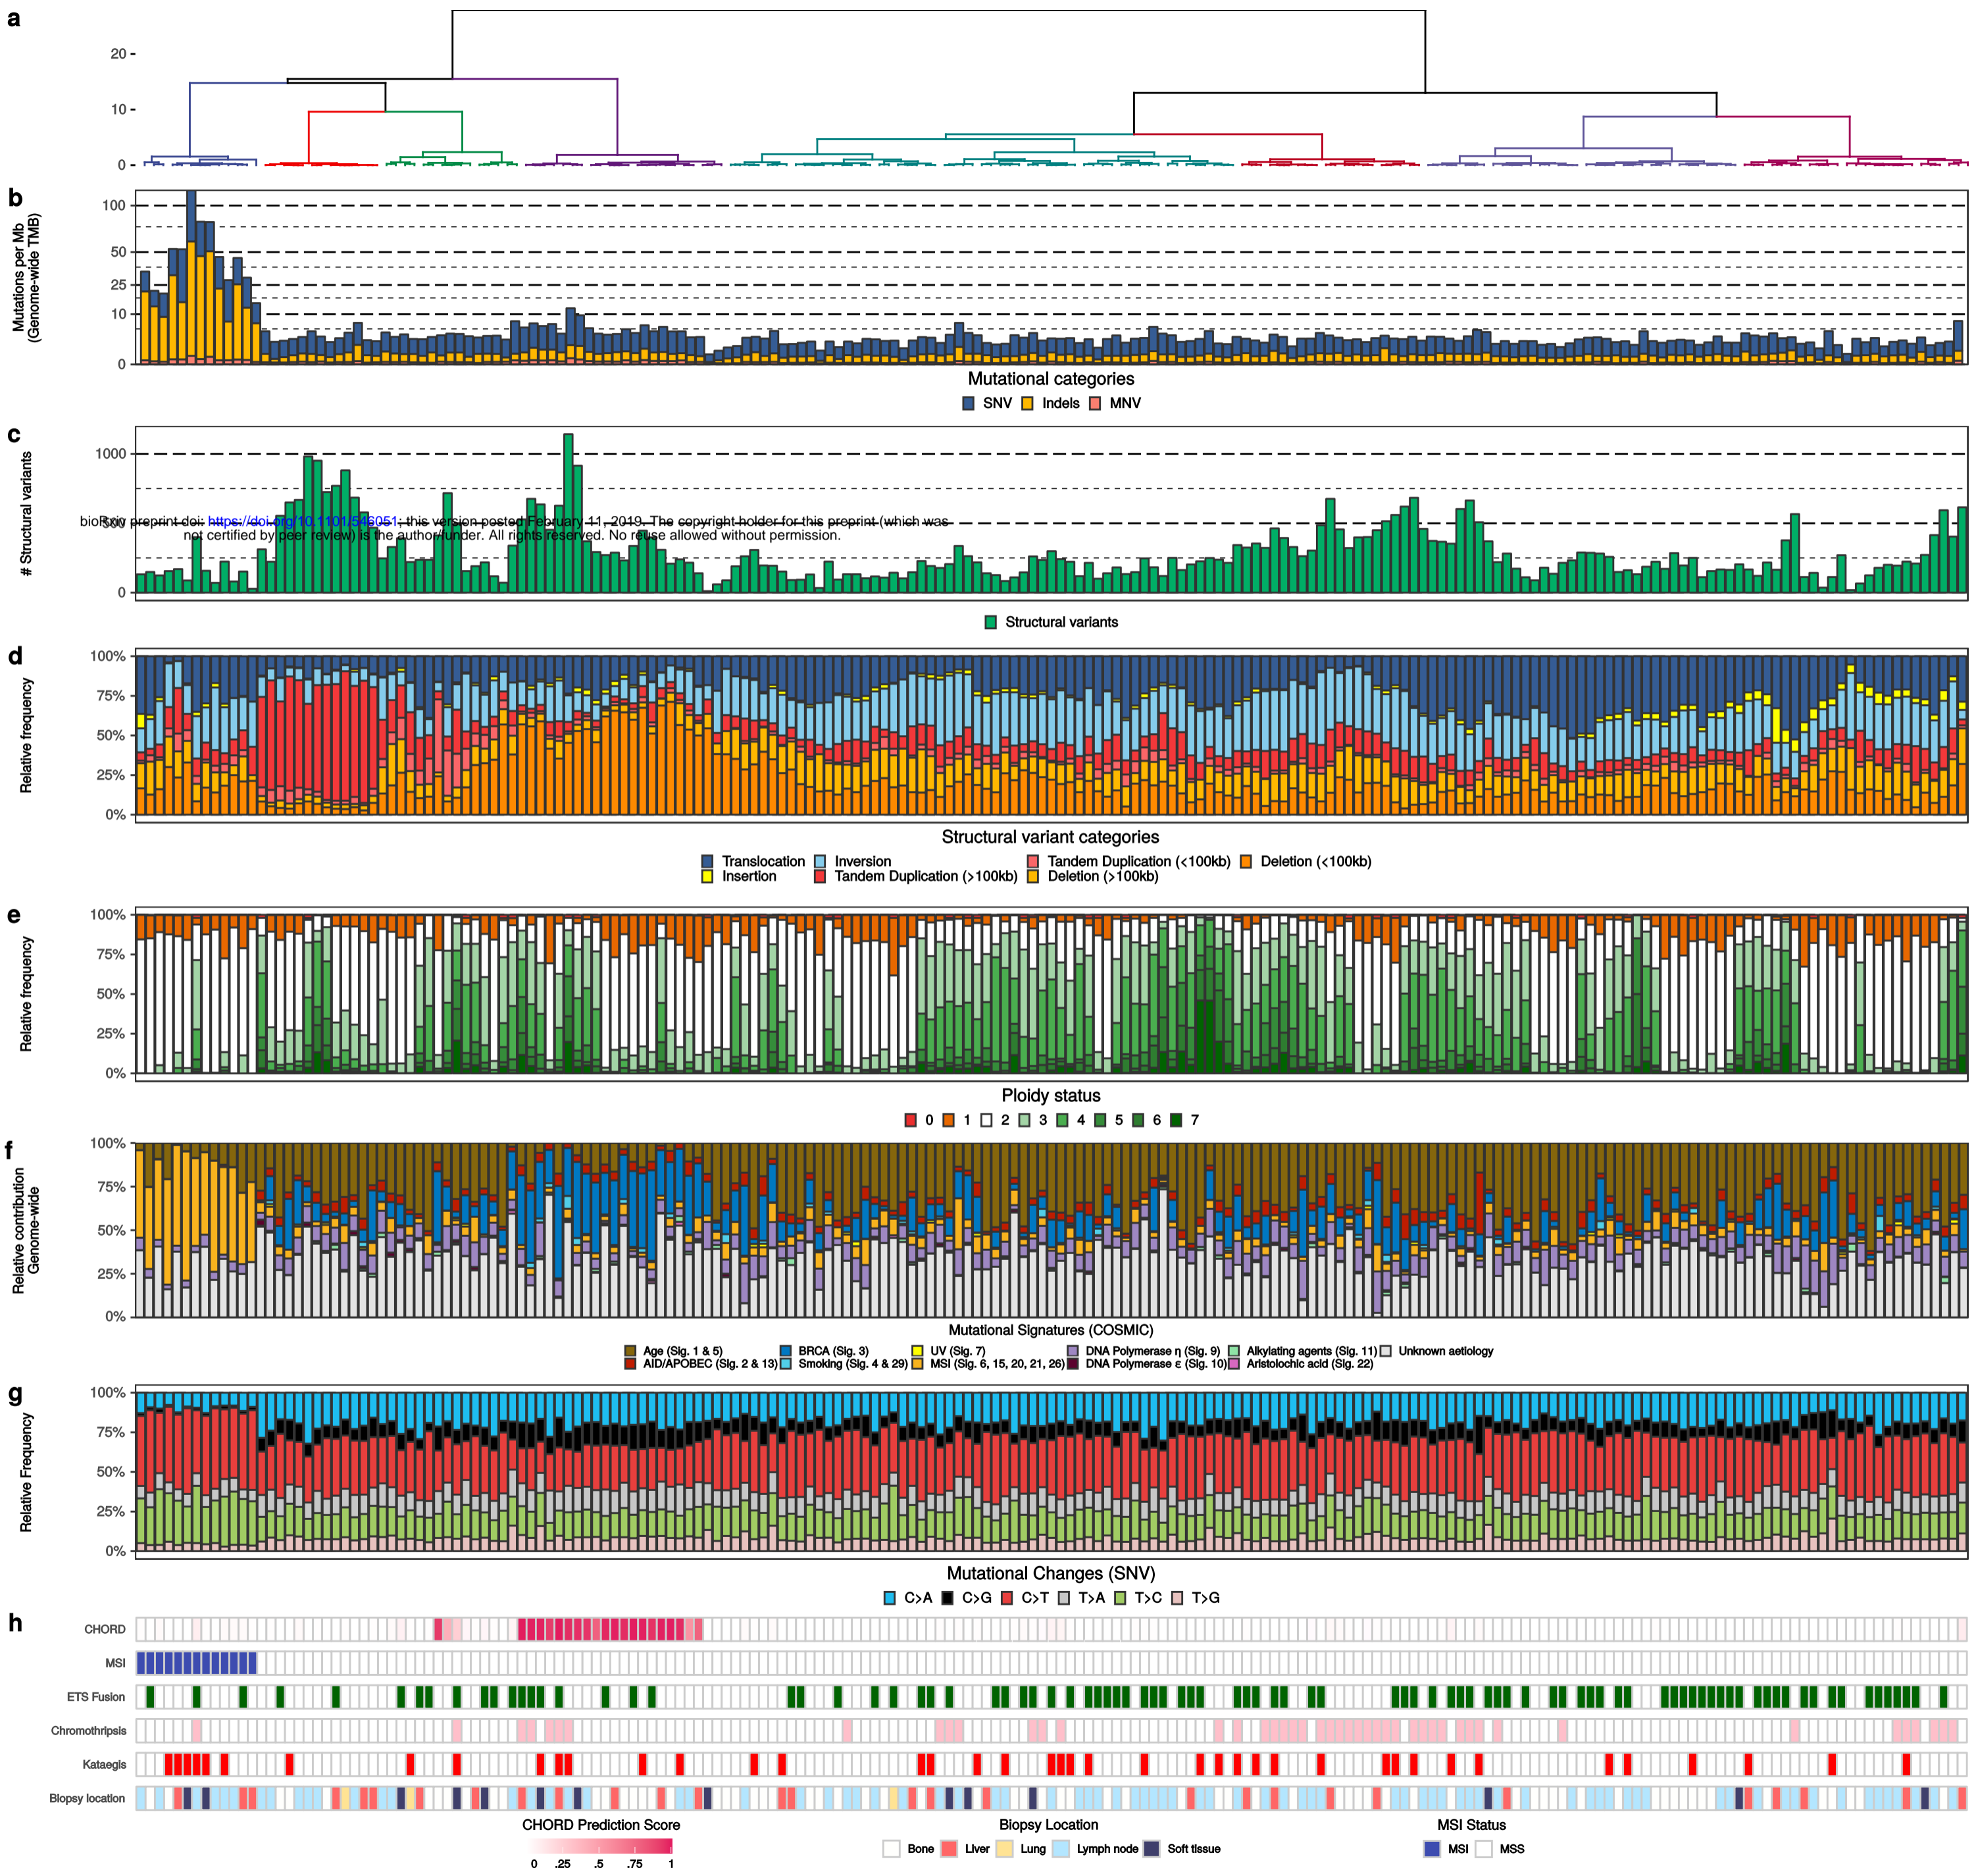

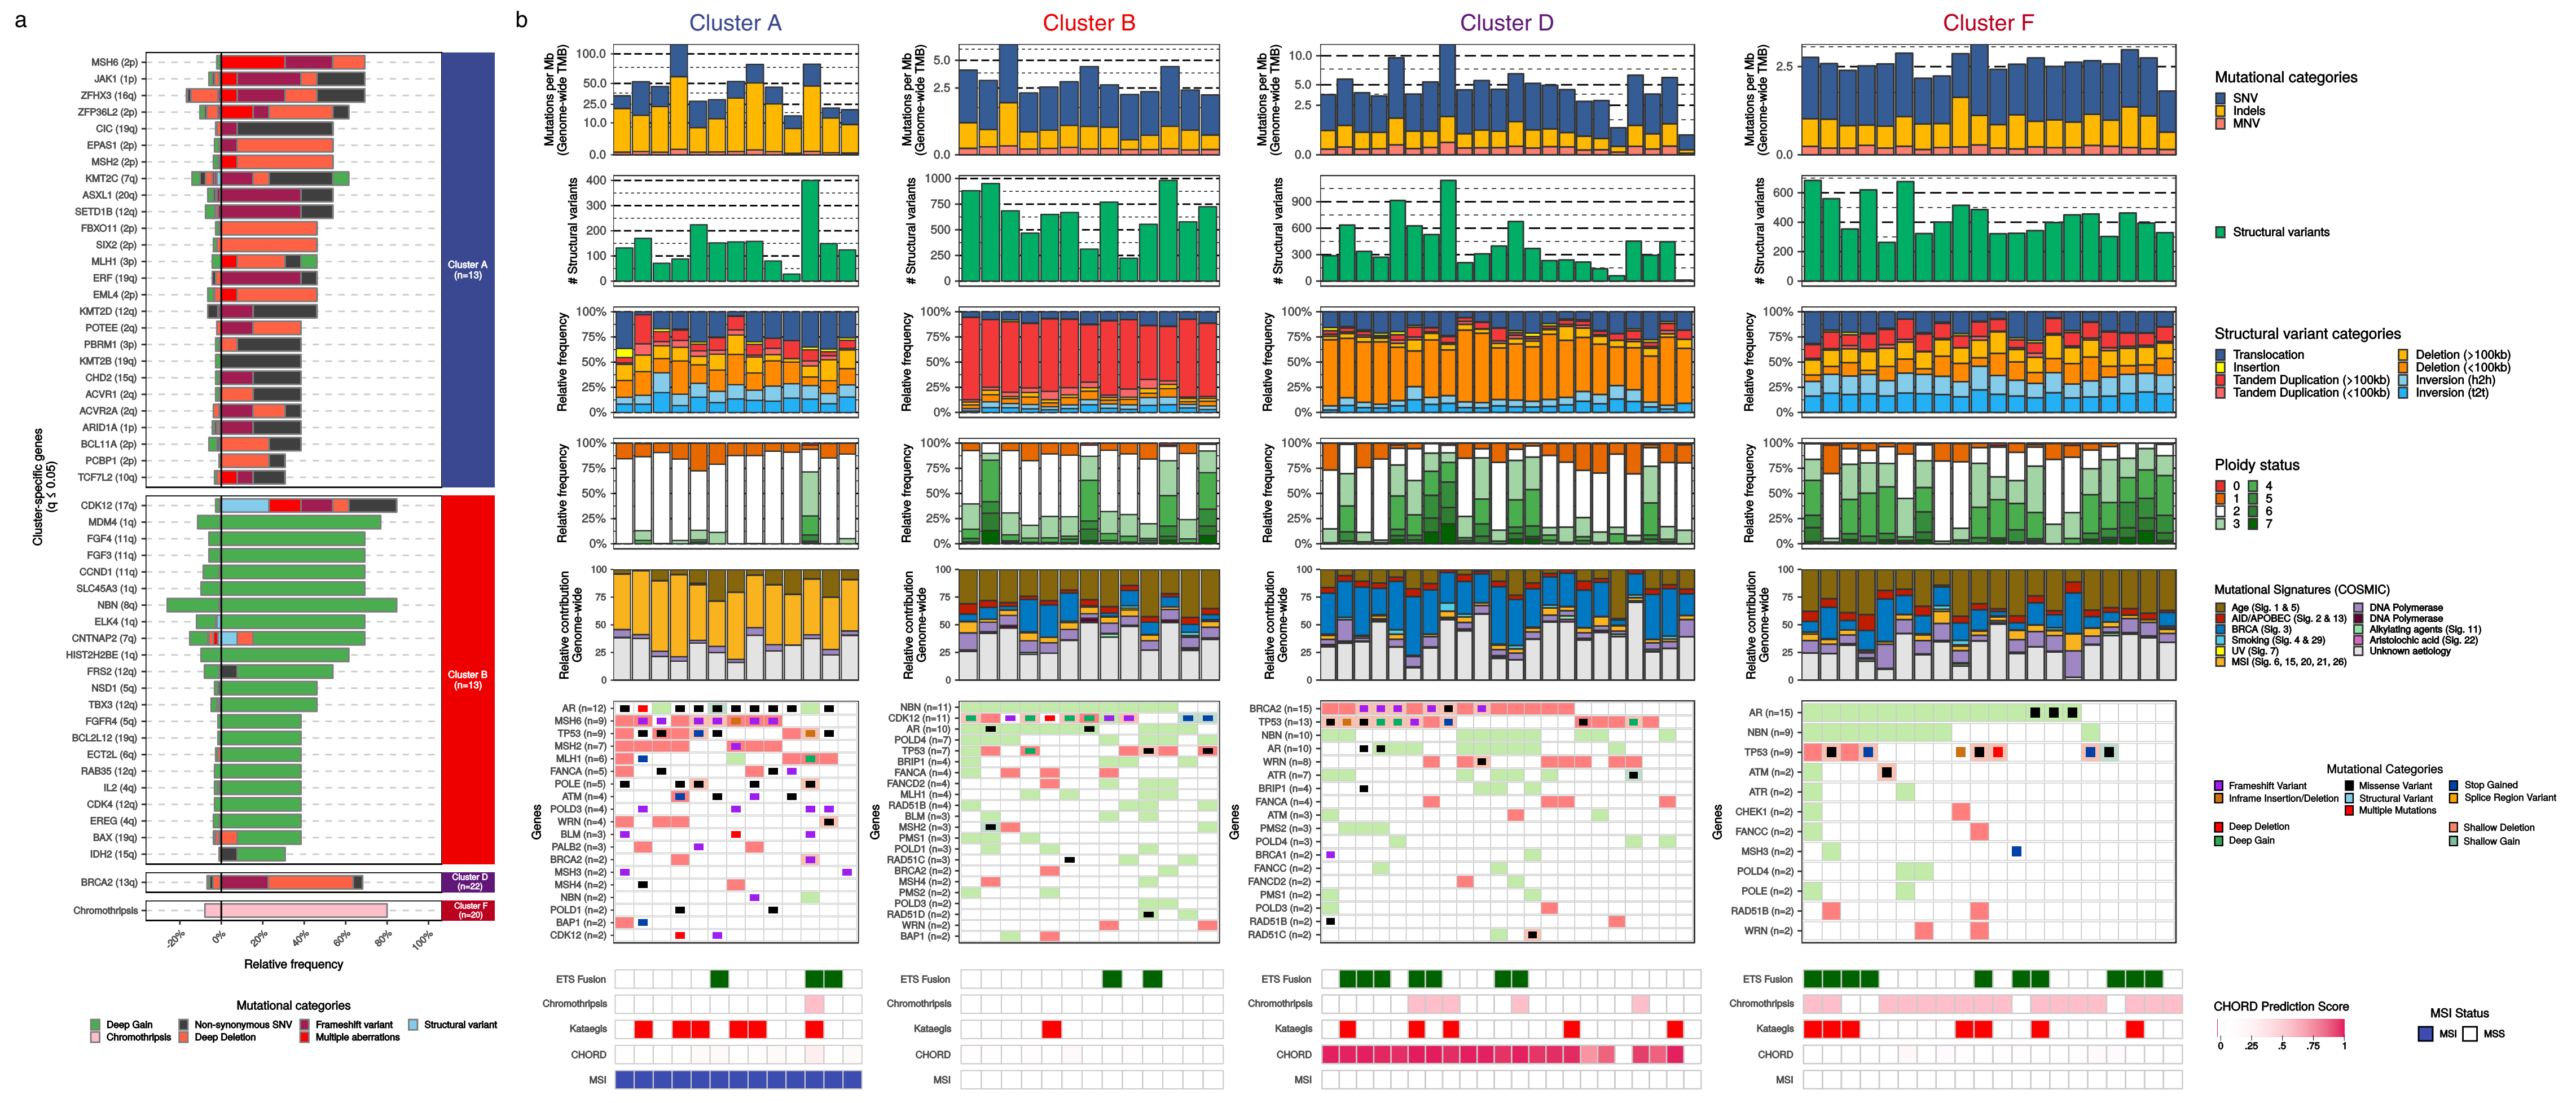

|                                                                     | <b>Cluster A</b>                         |
|---------------------------------------------------------------------|------------------------------------------|
| <b>Number of patients (n; % of cohort)</b>                          | 13 (6.6)                                 |
| <b>Tumor mutational burden (CDS)</b>                                | 36.88                                    |
| <b>InDel/SNV ratio</b>                                              | 0.99                                     |
| <b>Number of structural variants</b>                                | 149                                      |
| <b>Main structural variant category or differentiating category</b> | None                                     |
| <b>Ploidy status</b>                                                | 1.92                                     |
| <b>Main mutational signature</b>                                    | MSI                                      |
| <b>Top 3 cluster-specific aberrations (% of cluster)</b>            | MSH6 (69.2)<br>JAK1 (69.2)<br>CIC (58.3) |
| <b>ETS-fusions (n)</b>                                              | 3                                        |
| <b>Chromothripsis (n)</b>                                           | 1                                        |
| <b>Kataegis (n)</b>                                                 | 6                                        |

*All numbers are median of the cluster, unless otherwise indicated.  
CDS, coding sequence*

**Table 1: Cluster characteristics**

| <b>Cluster B</b>                           | <b>Cluster C</b>              | <b>Cluster D</b>   |
|--------------------------------------------|-------------------------------|--------------------|
| 13 (6.6)                                   | 15 (7.6)                      | 22 (11.2)          |
| 2.44                                       | 3.00                          | 4.39               |
| 7.07                                       | 6.73                          | 7.28               |
| 669                                        | 237                           | 323                |
| Tandem duplications (>100 kb)              | Tandem duplications (<100 kb) | Deletions (>100kb) |
| 2.39                                       | 3.19                          | 2.16               |
| N/A                                        | N/A                           | BRCA               |
| CDK12 (84.6)<br>FGF3 (69.2)<br>FGF4 (69.2) | None                          | BRCA2 (68.2)       |
| 2                                          | 7                             | 7                  |
| 0                                          | 1                             | 5                  |
| 1                                          | 2                             | 5                  |

---

---

| <b>Cluster E</b> | <b>Cluster F</b>    | <b>Cluster G</b> |
|------------------|---------------------|------------------|
| 55 (27.9)        | 20 (10.15)          | 34 (17.3)        |
| 2.12             | 2.51                | 2.12             |
| 7.13             | 6.15                | 6.13             |
| 178              | 399.5               | 221.5            |
| None             | None                | None             |
| 3.24             | 3.35                | 2.98             |
| N/A              | N/A                 | N/A              |
| None             | Chromothripsis (80) | None             |
| 25               | 10                  | 23               |
| 8                | 16                  | 8                |
| 13               | 7                   | 5                |

---

---

|                  |
|------------------|
|                  |
|                  |
|                  |
| <b>Cluster H</b> |
| 25 (12.7)        |
| 2.30             |
| 5.81             |
| 201              |
| Insertions       |
| 1.97             |
| N/A              |
| None             |
| 16               |
| 7                |
| 3                |
|                  |
|                  |



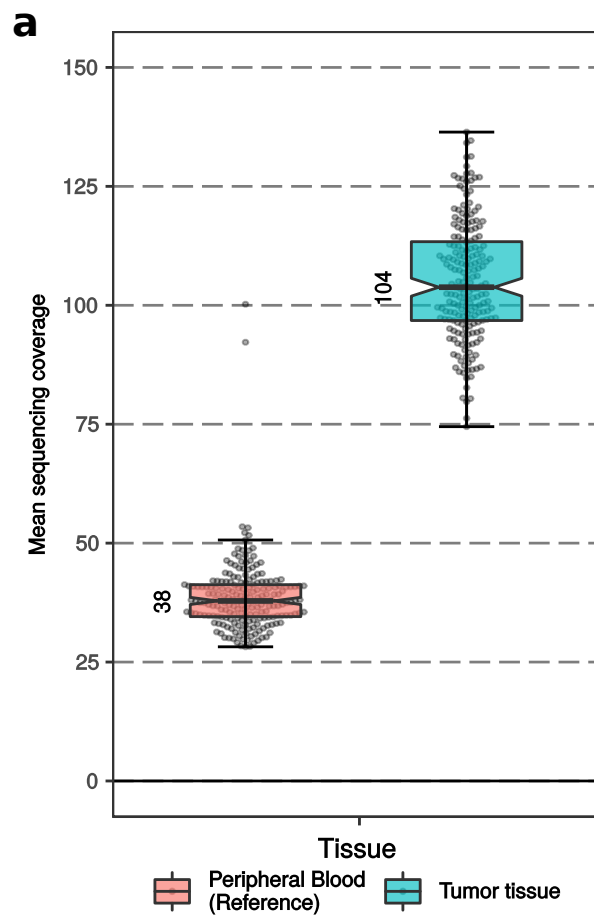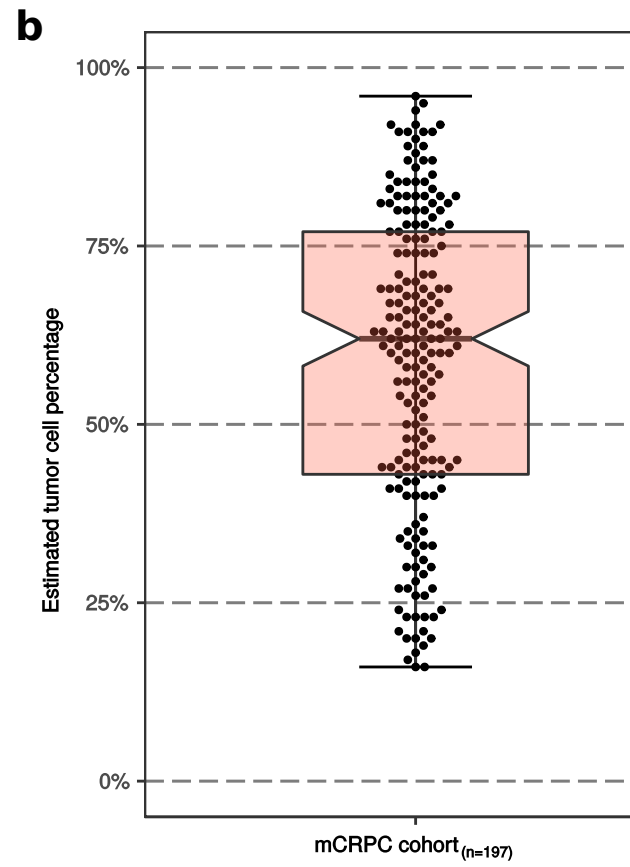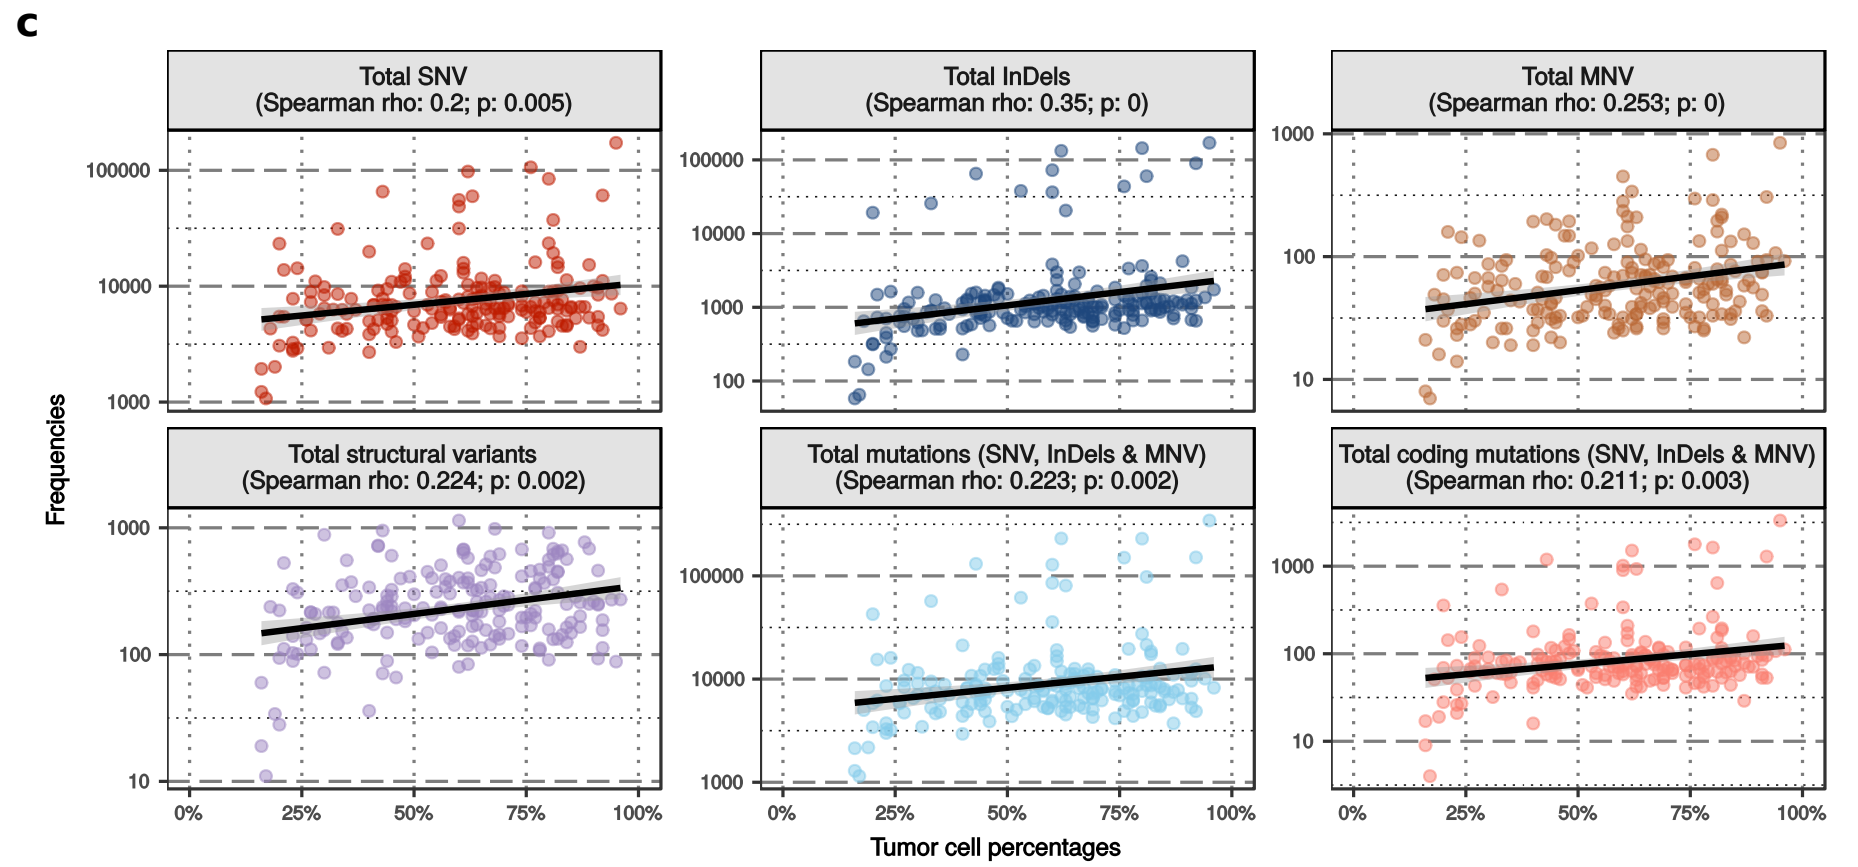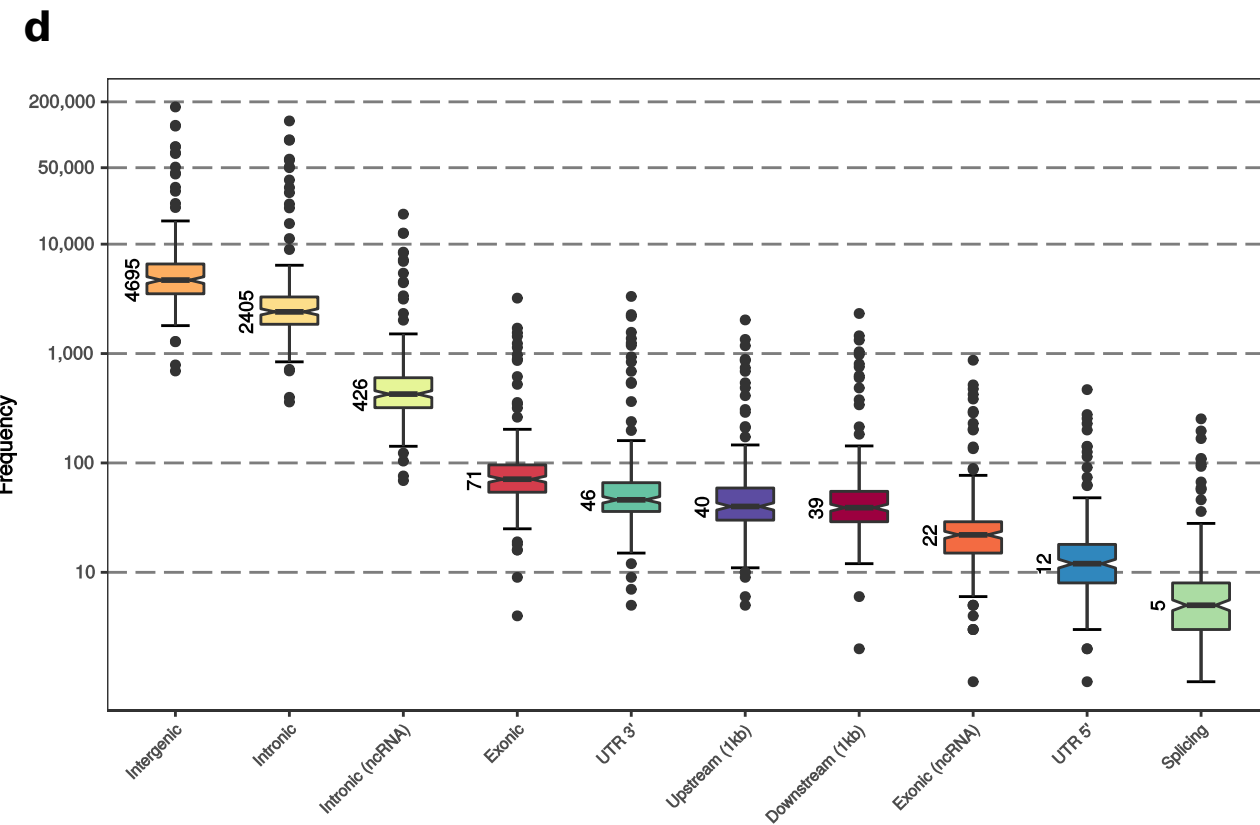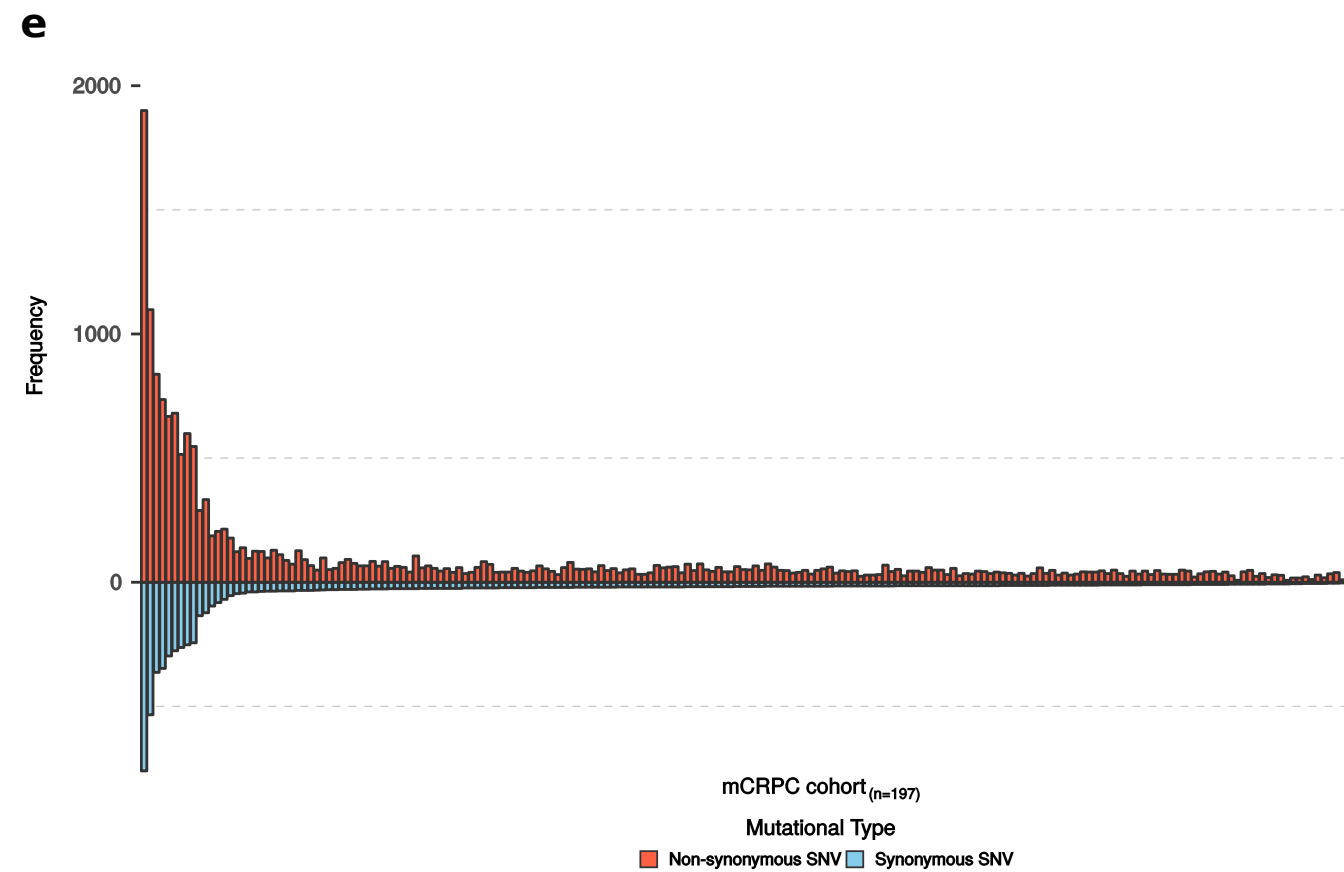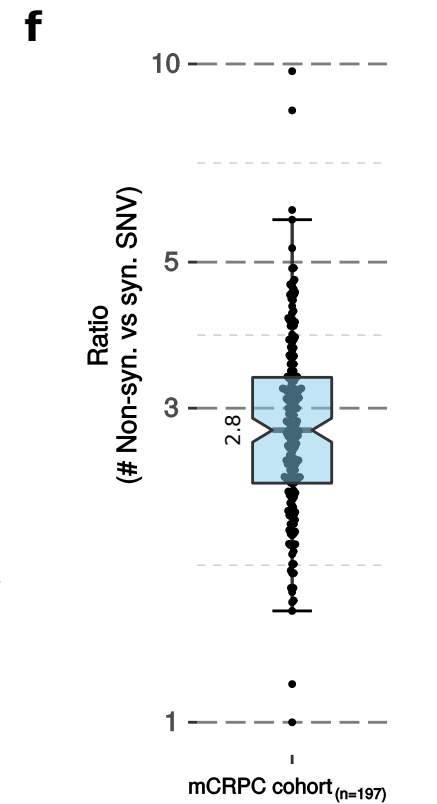

Tumor Mutation Burden (CDS)

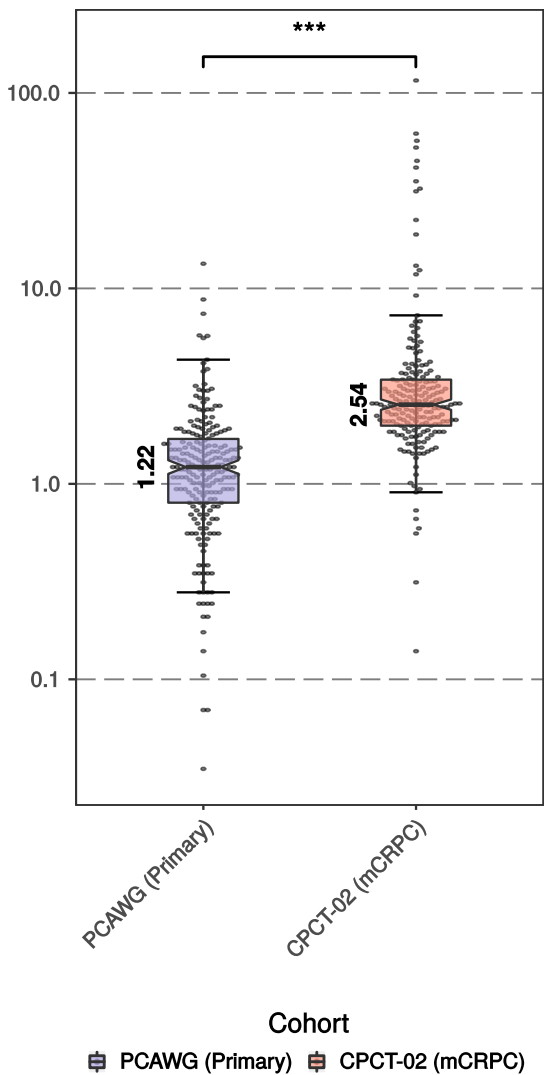

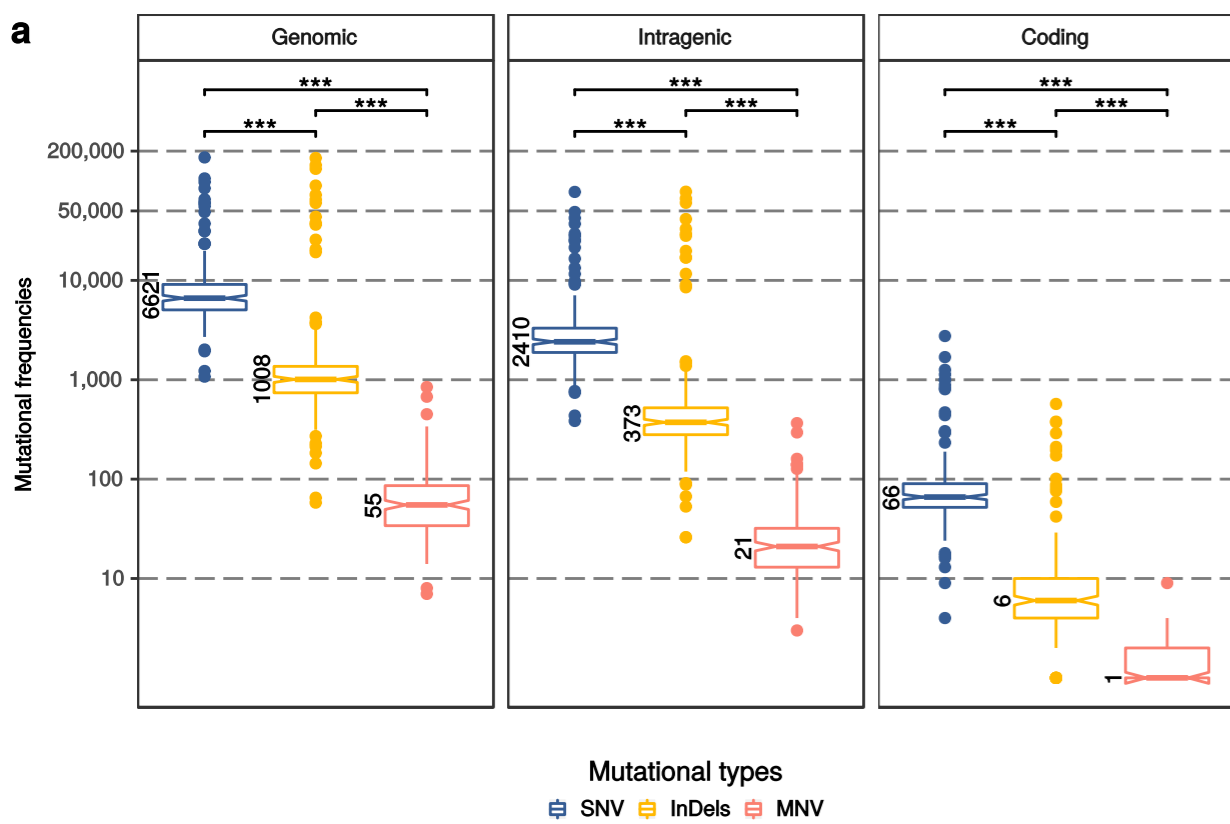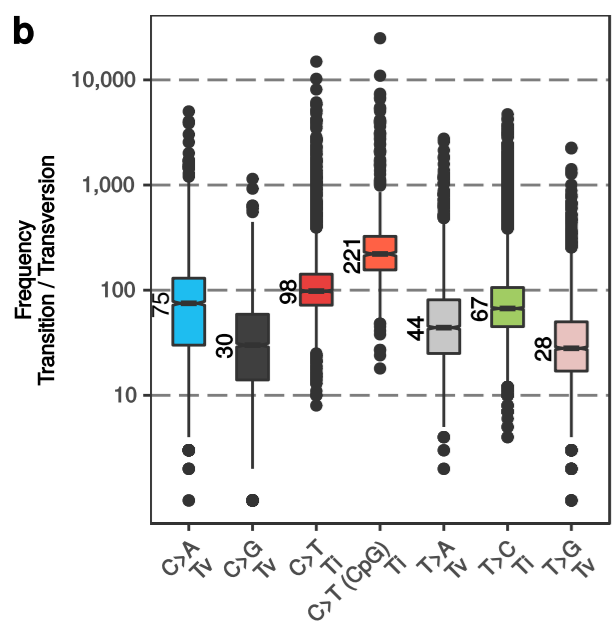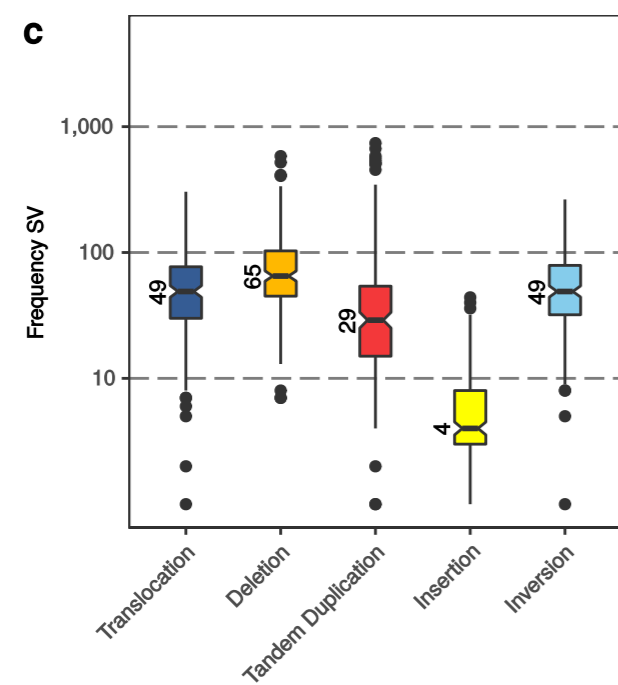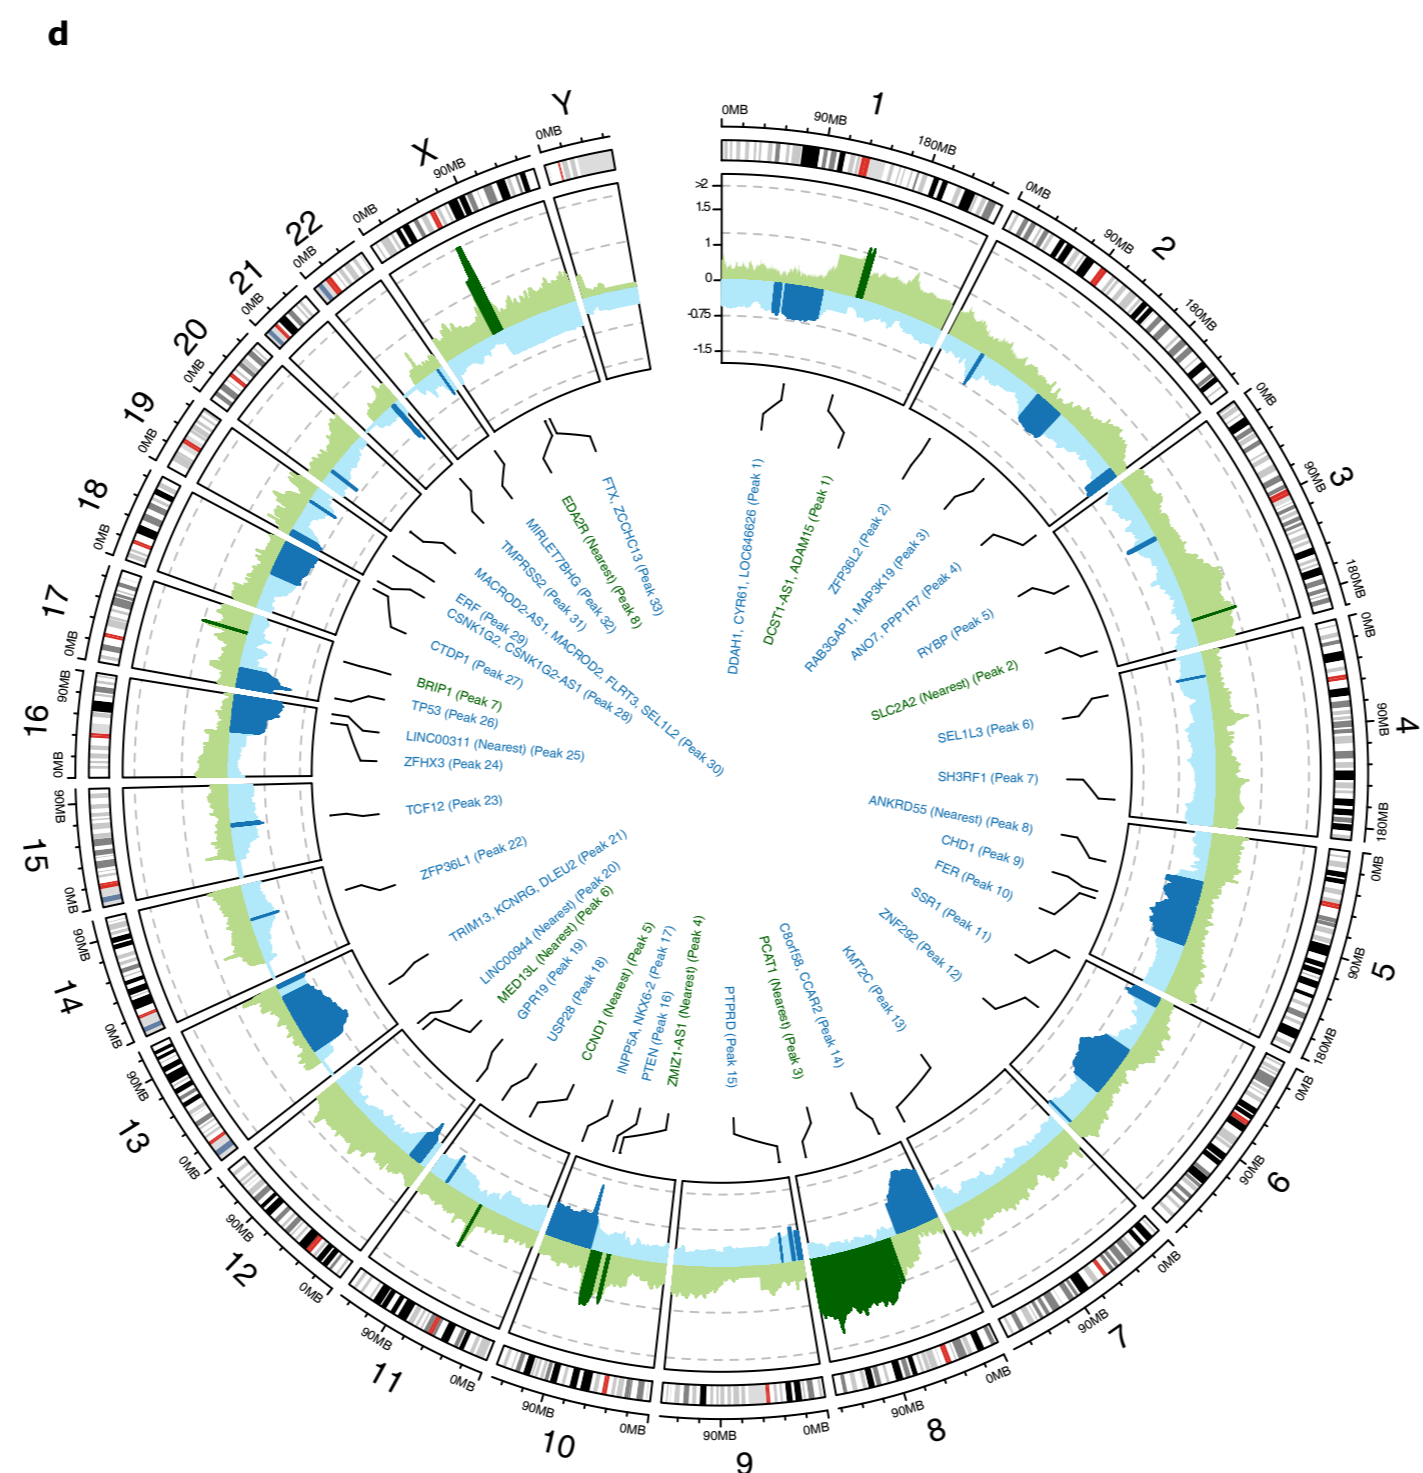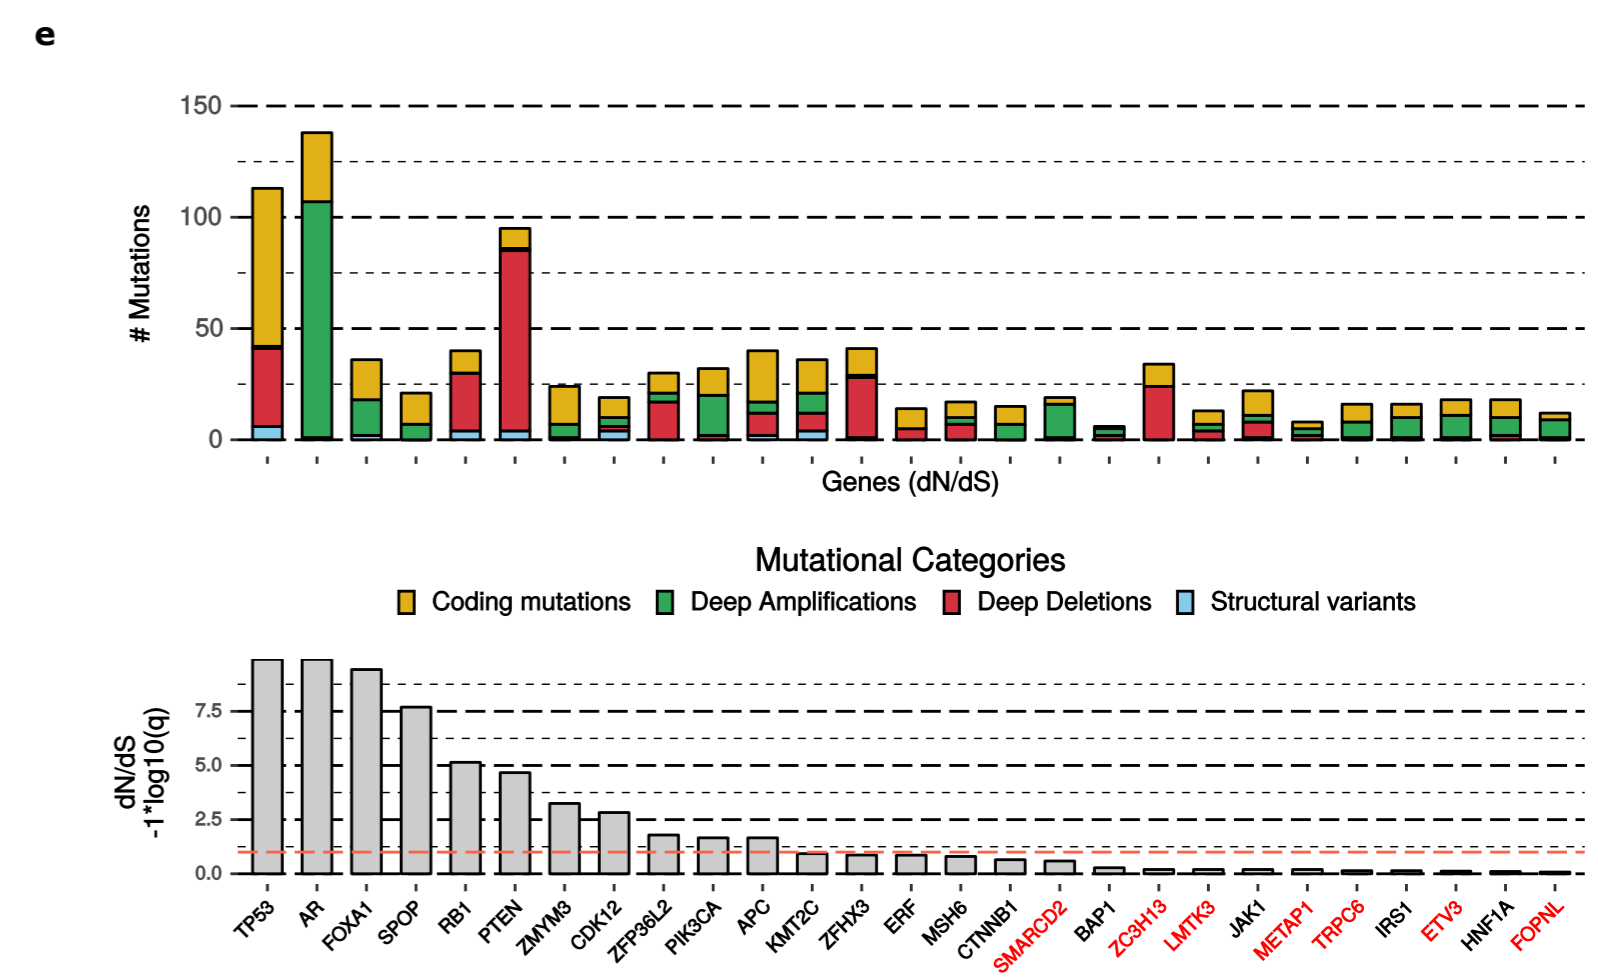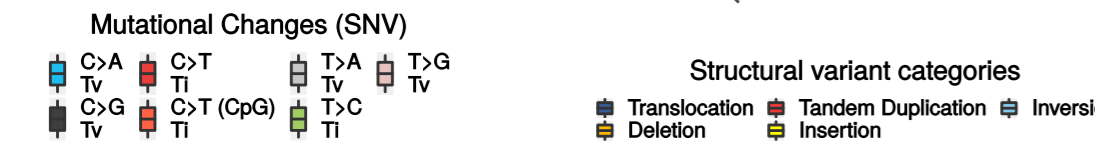

**a**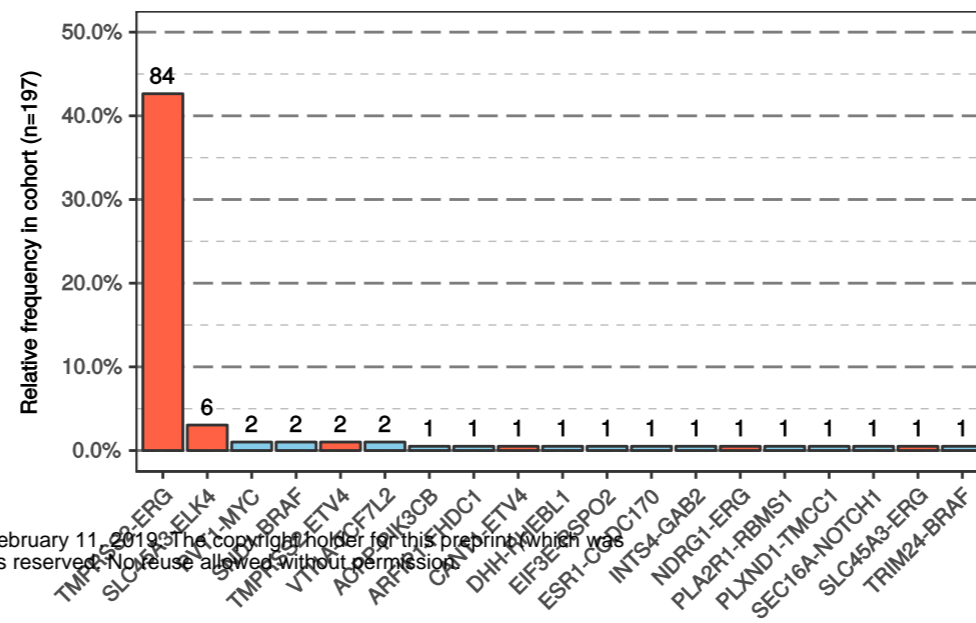

bioRxiv preprint doi: <https://doi.org/10.1101/546051>; this version posted February 11, 2019. The copyright holder for this preprint (which was not certified by peer review) is the author/funder. All rights reserved. No reuse allowed without permission.

Involves ETS  
 No Yes

**b**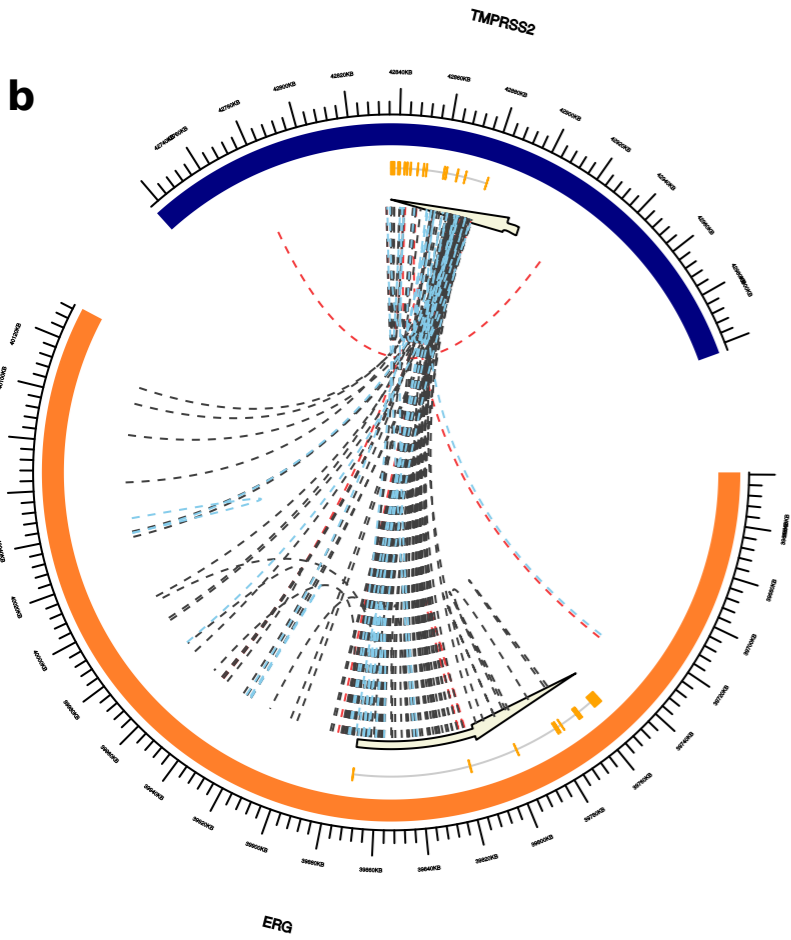**c**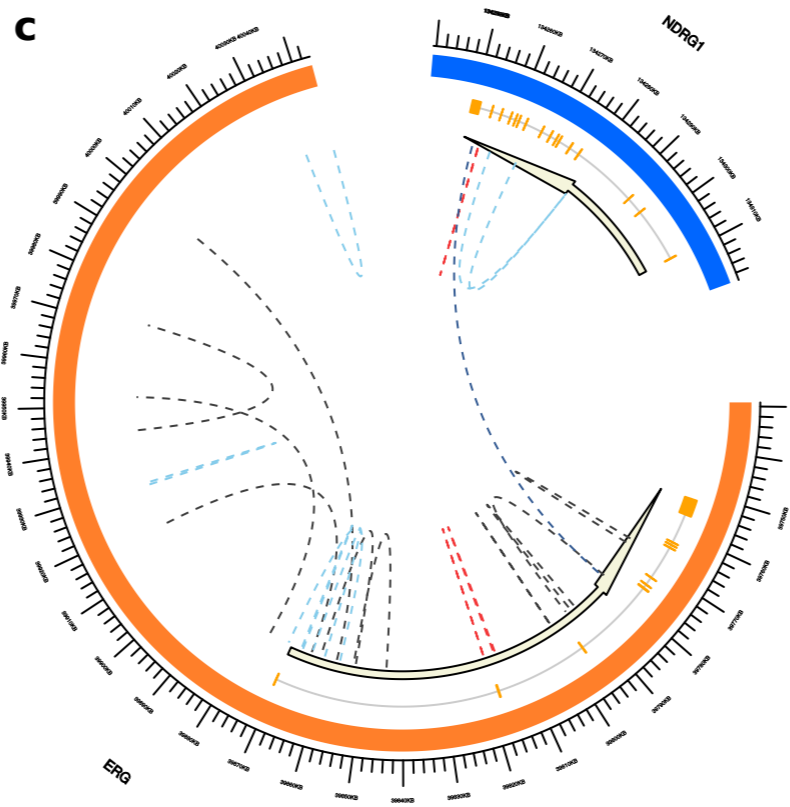**d**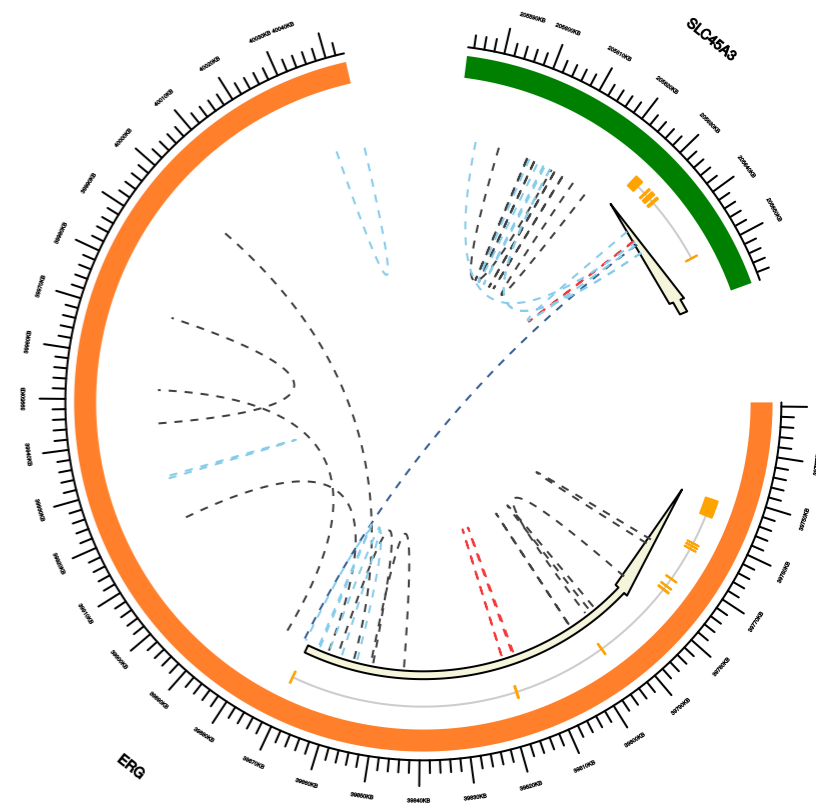**e**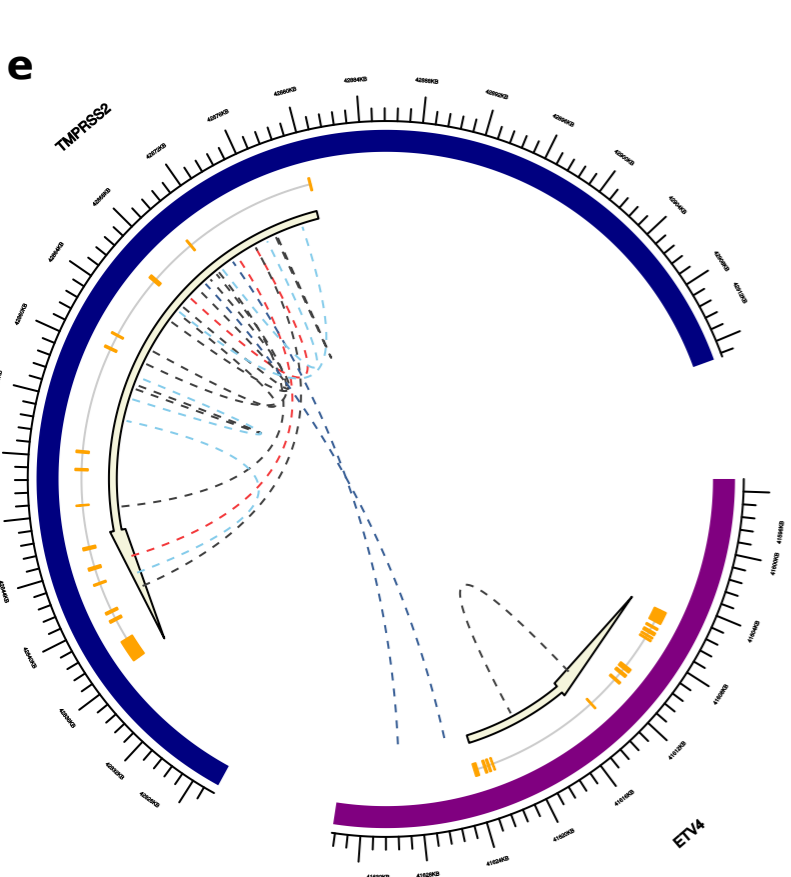**f**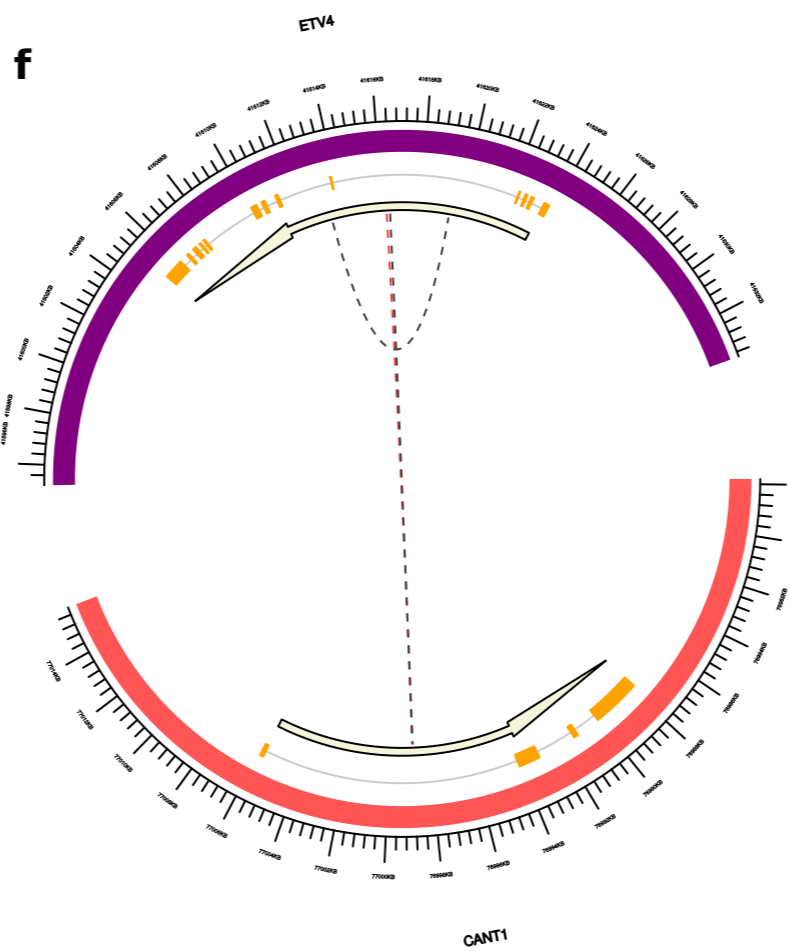**g**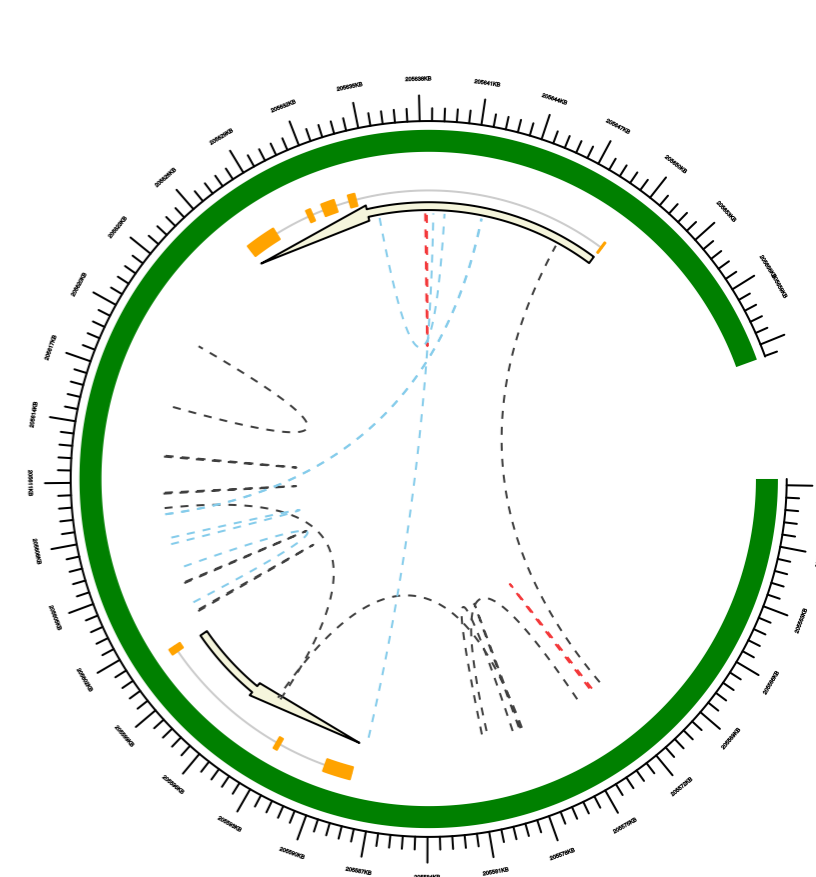

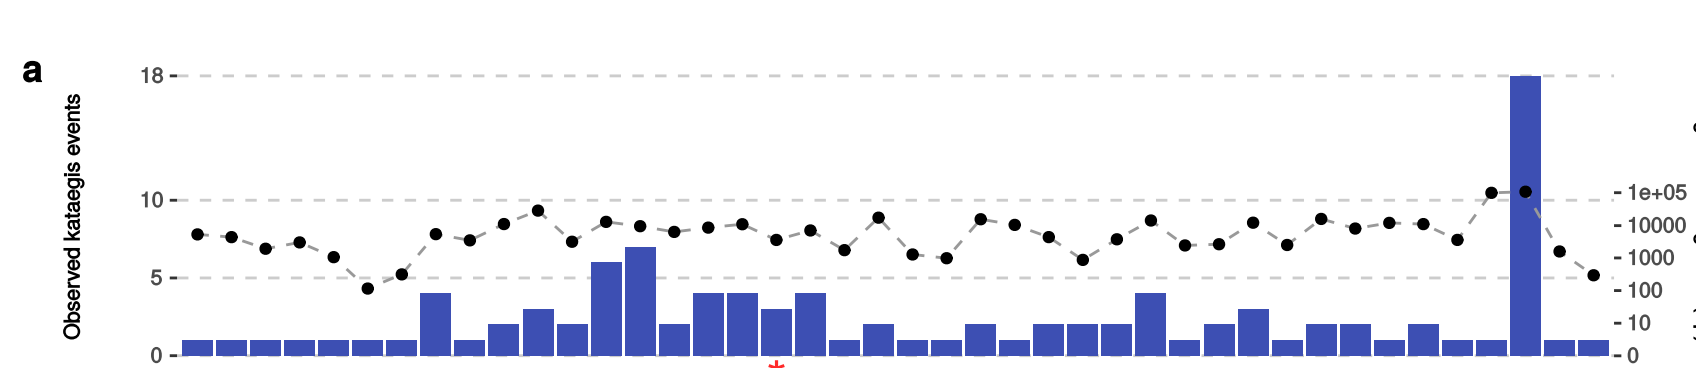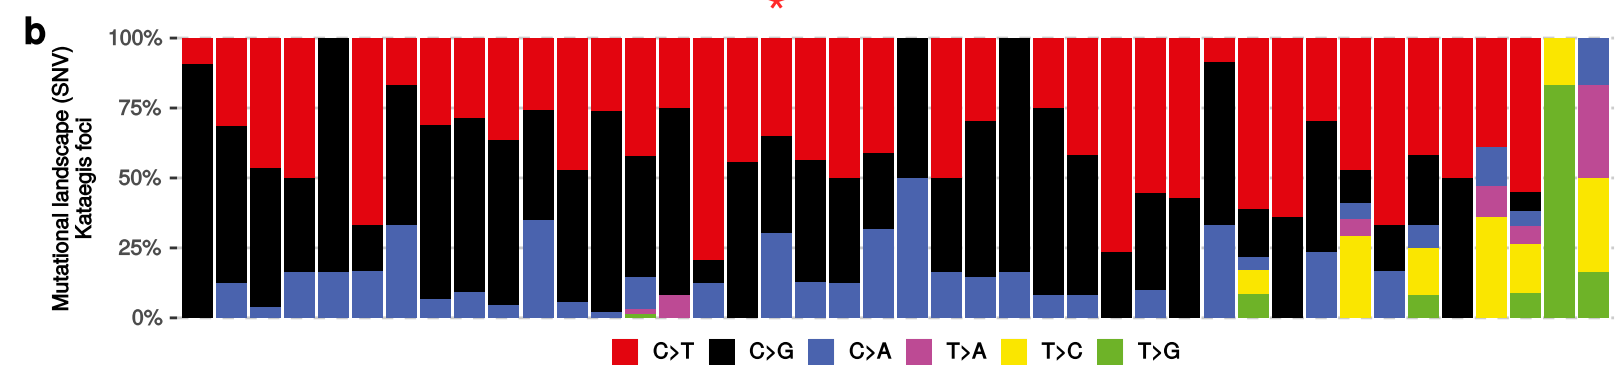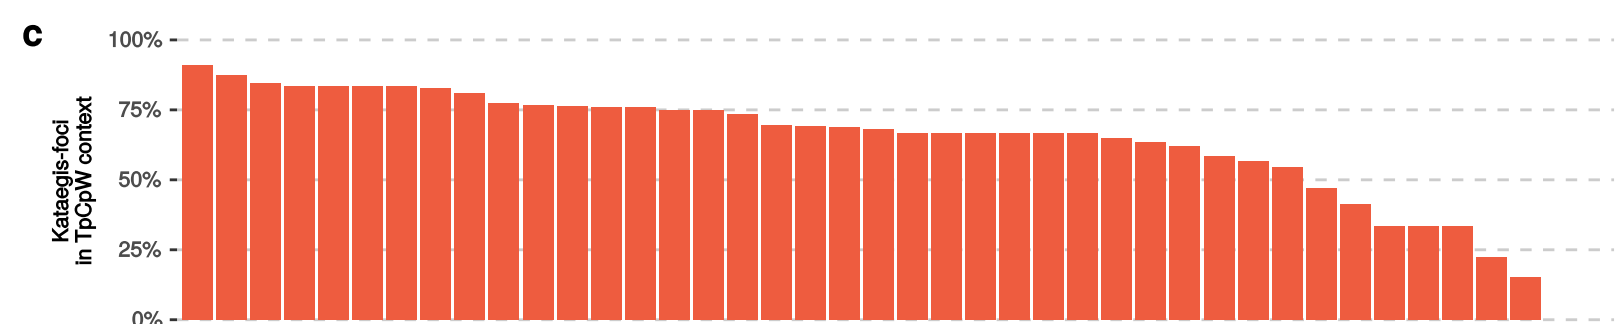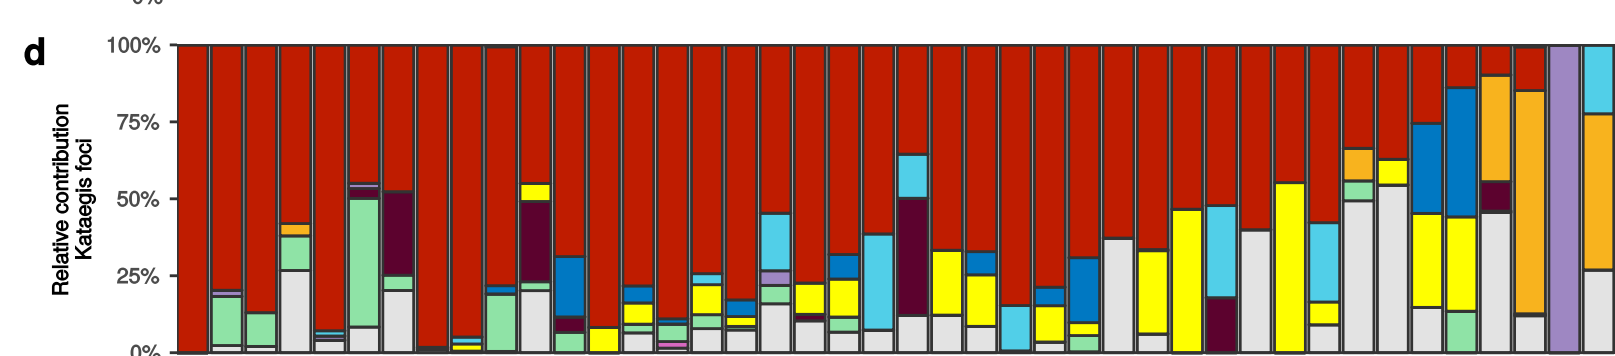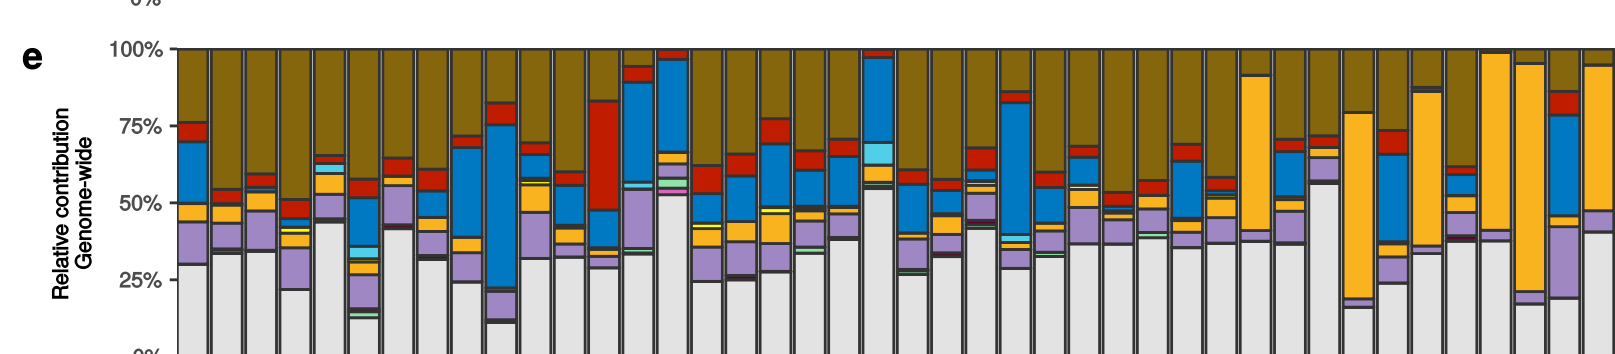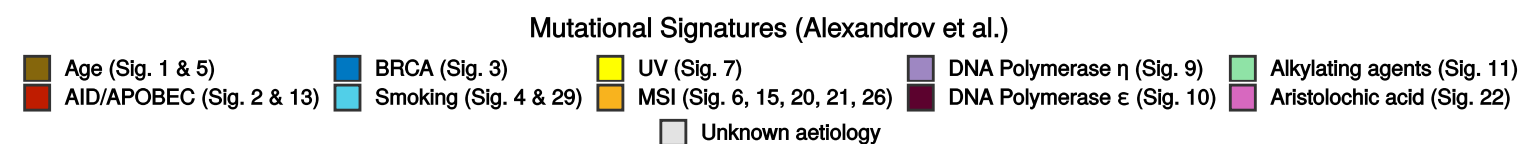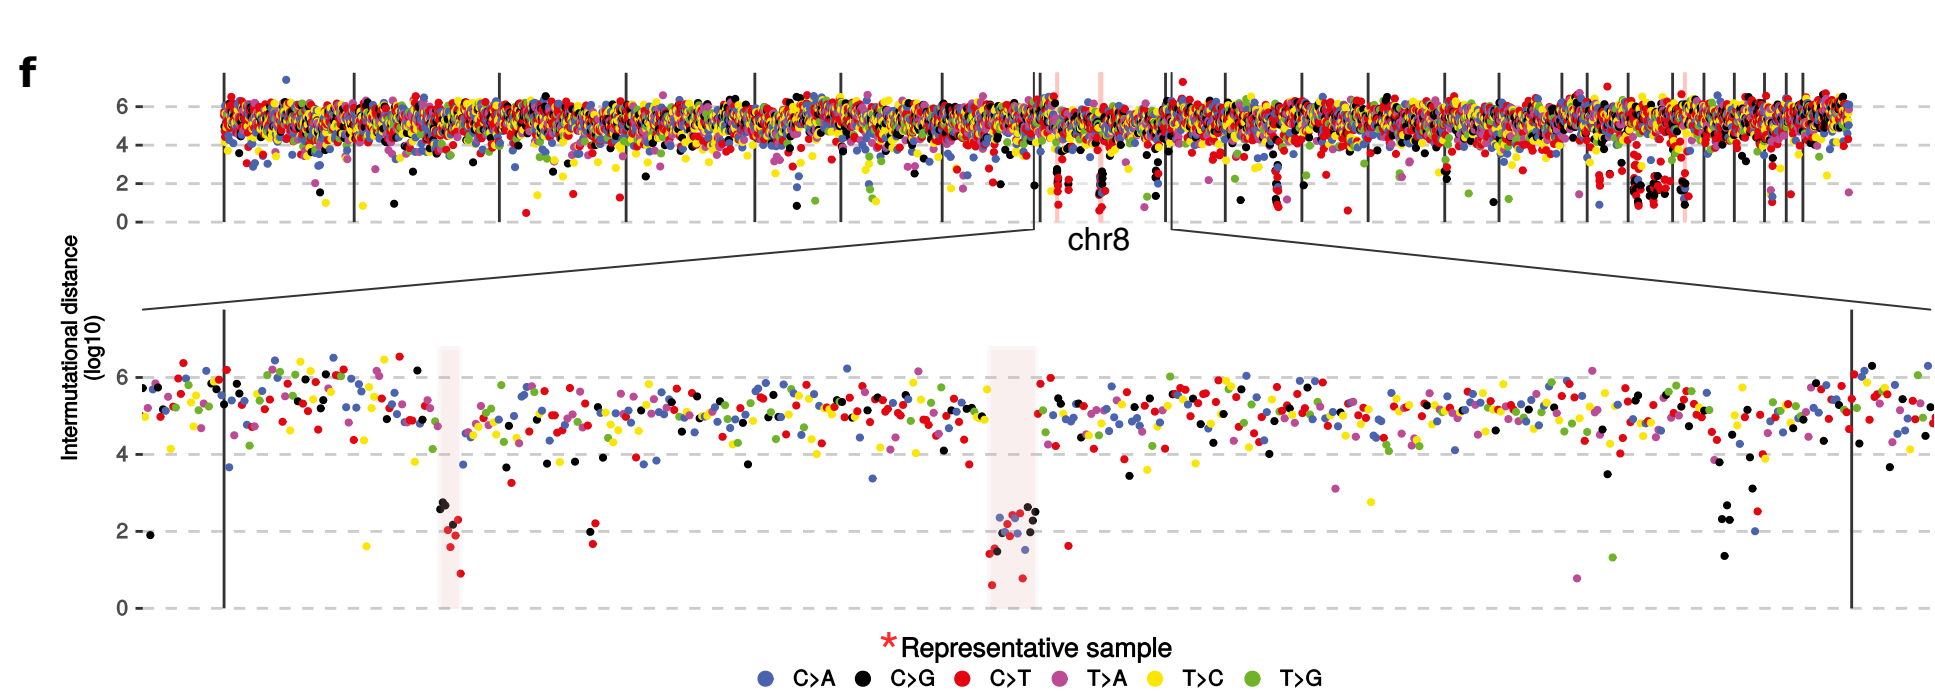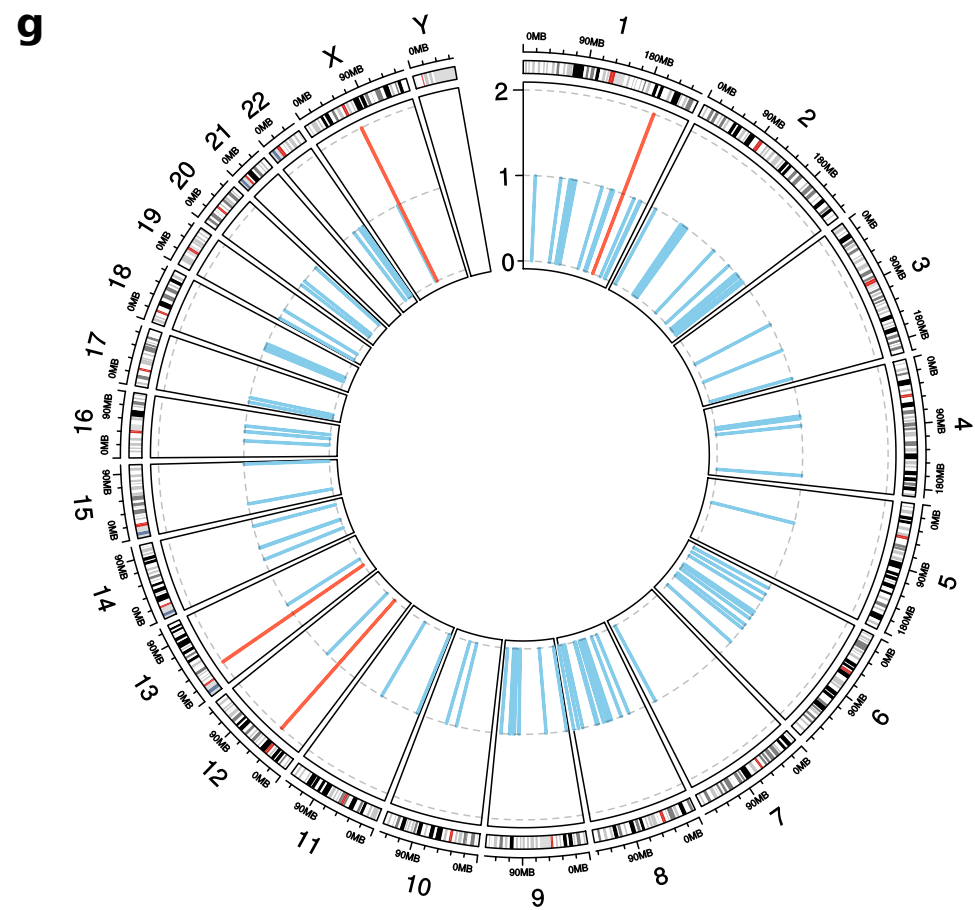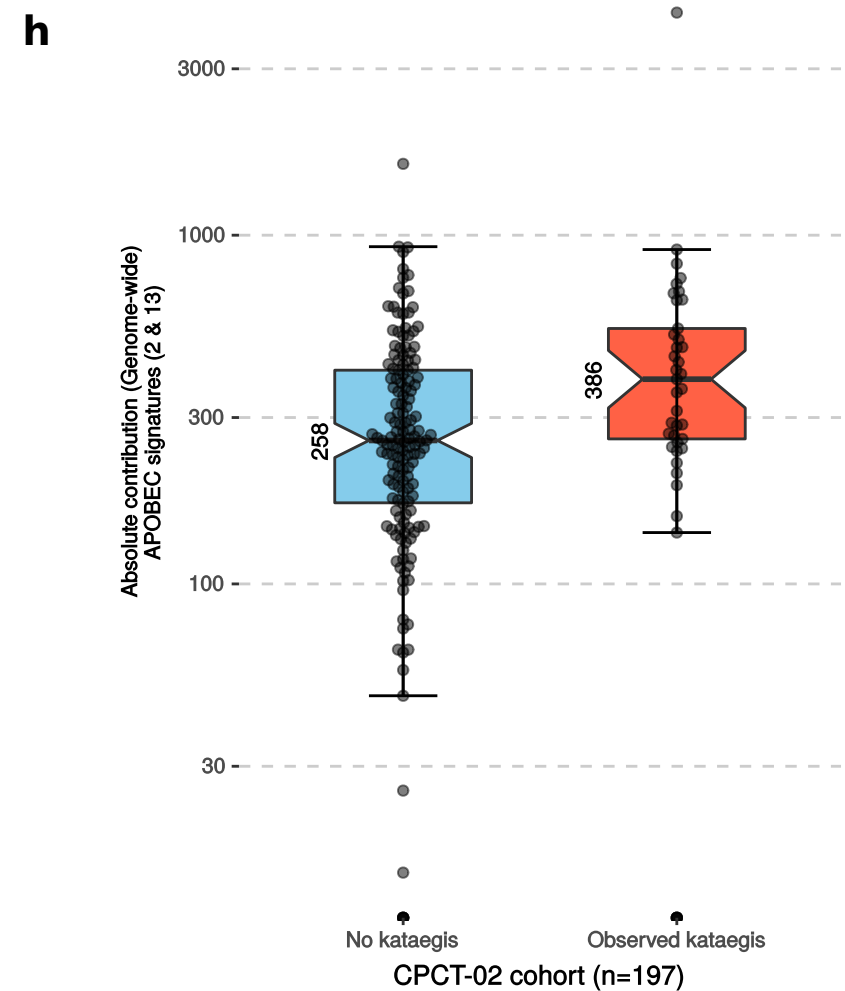

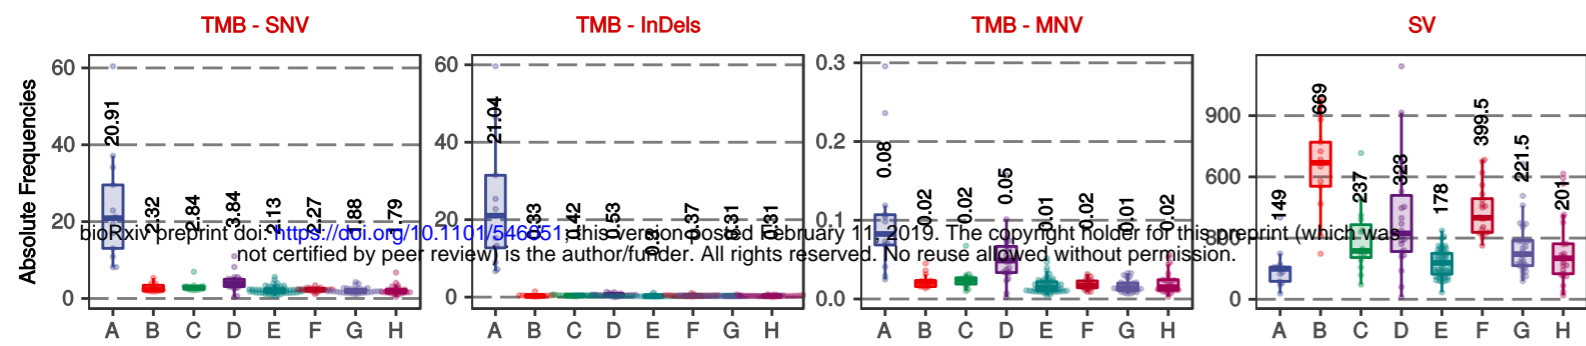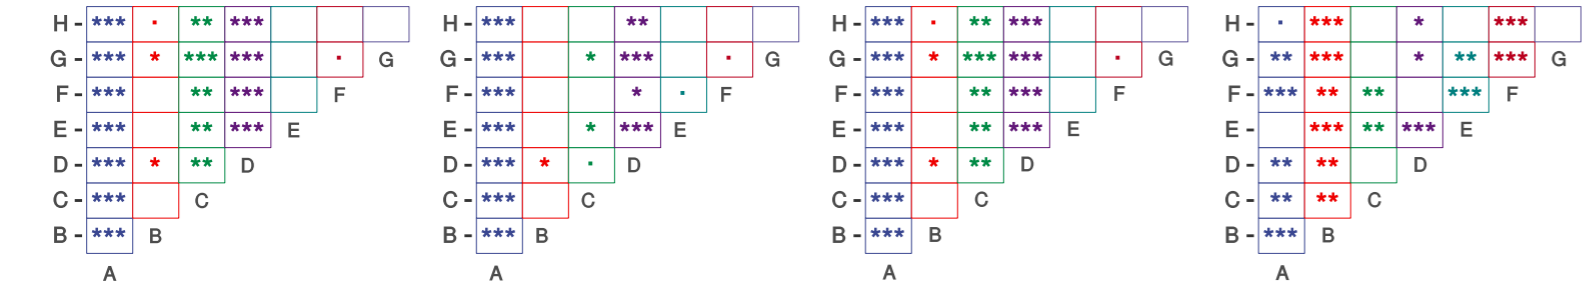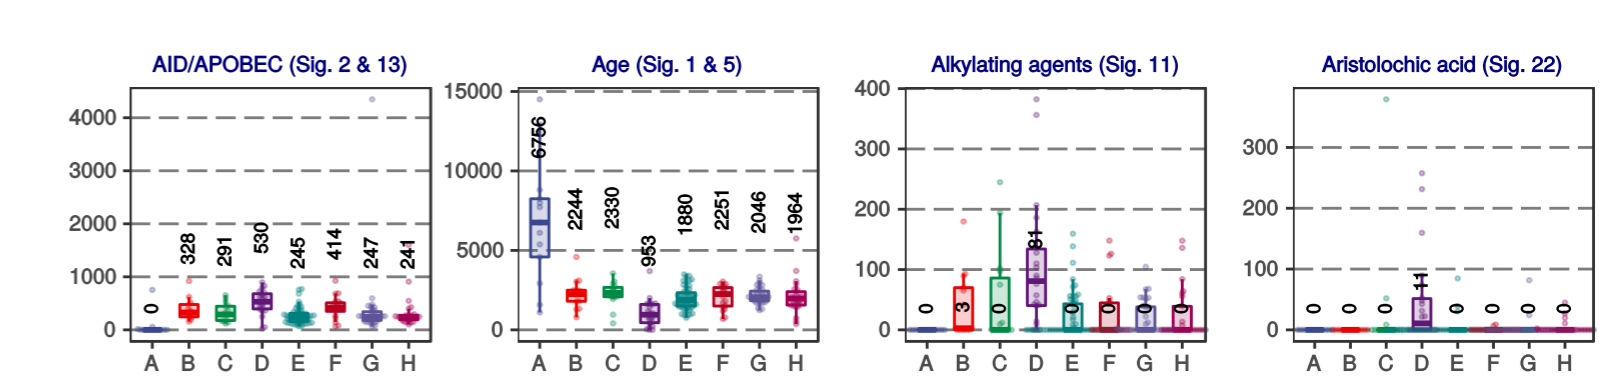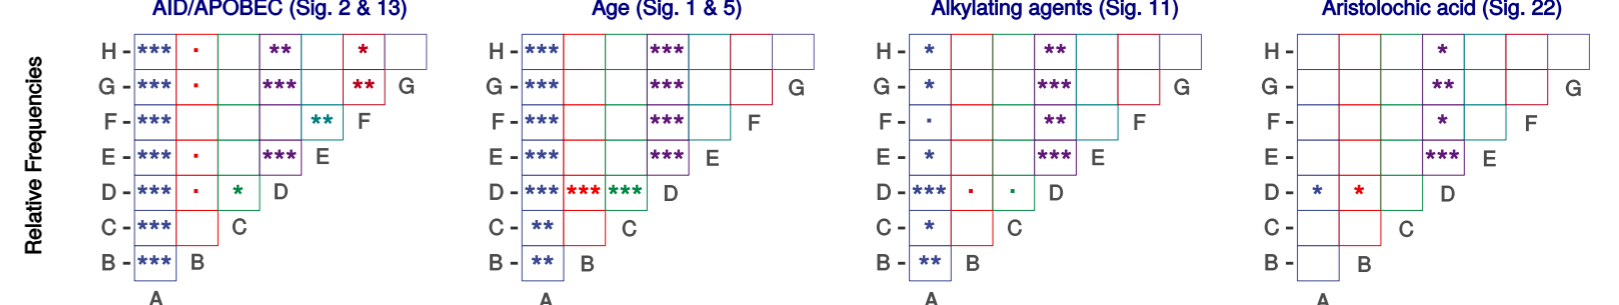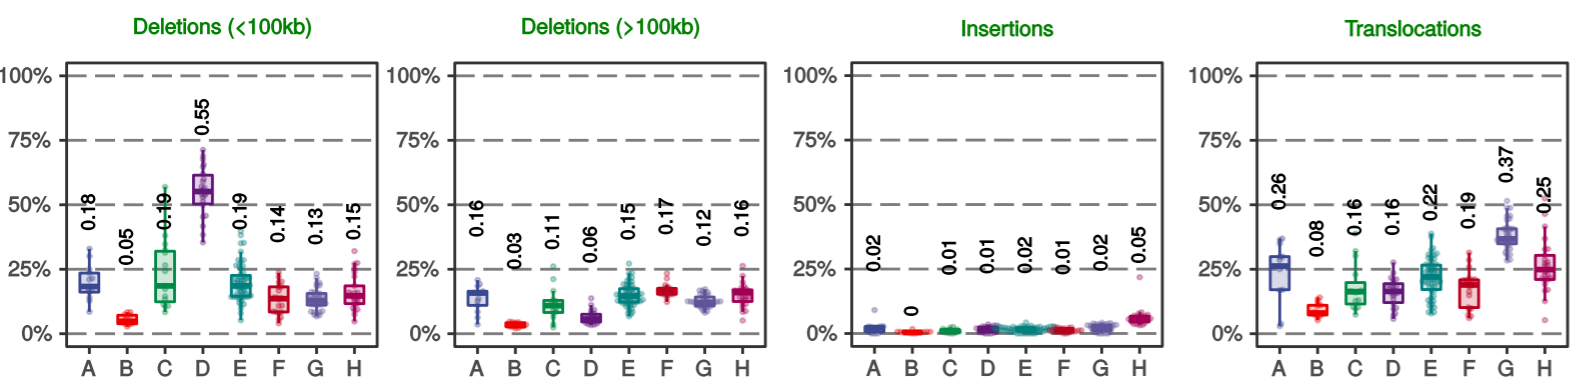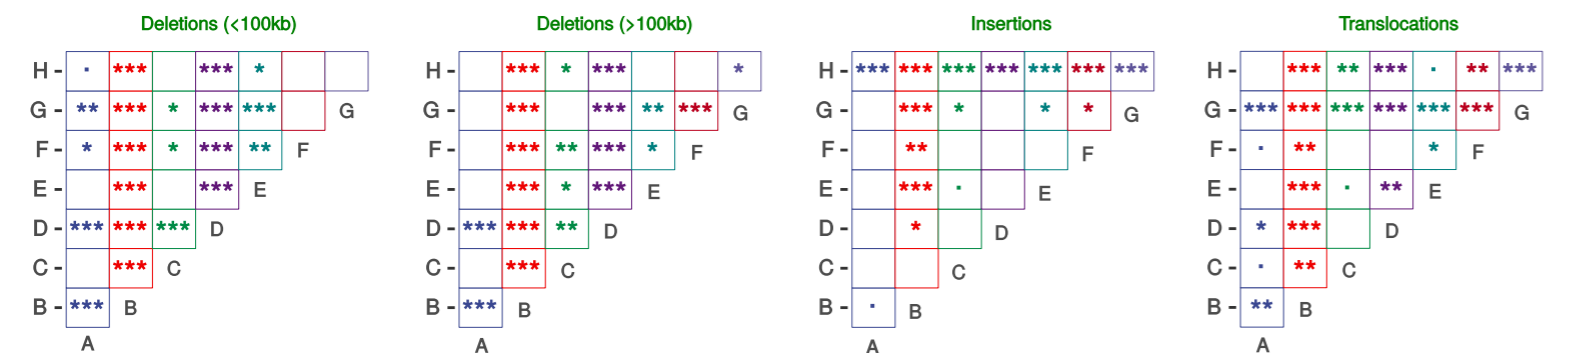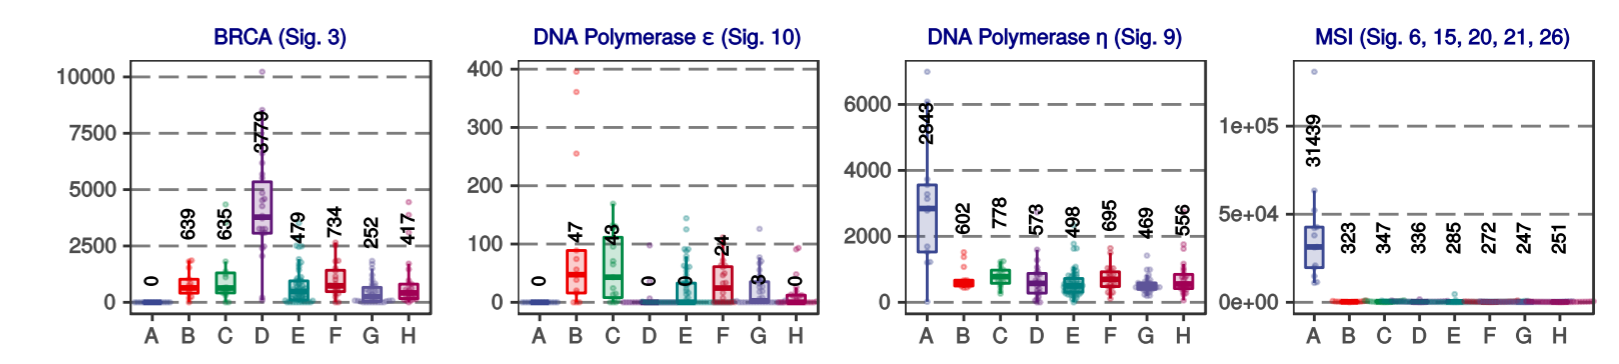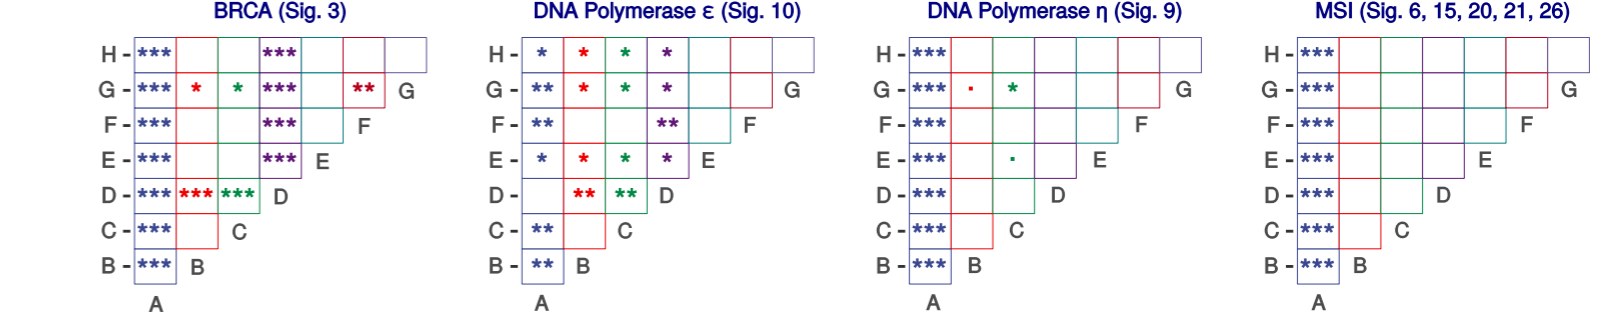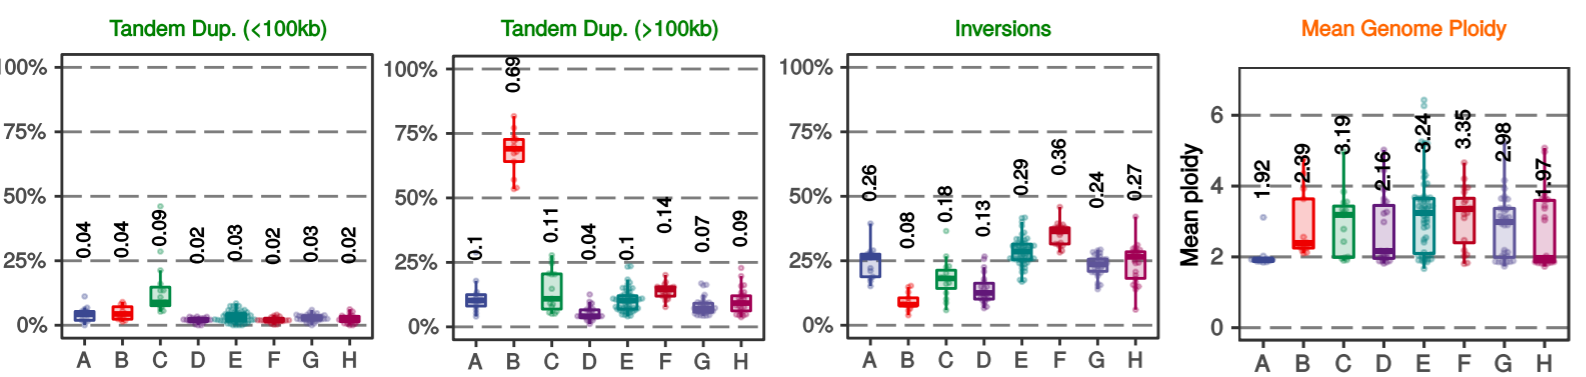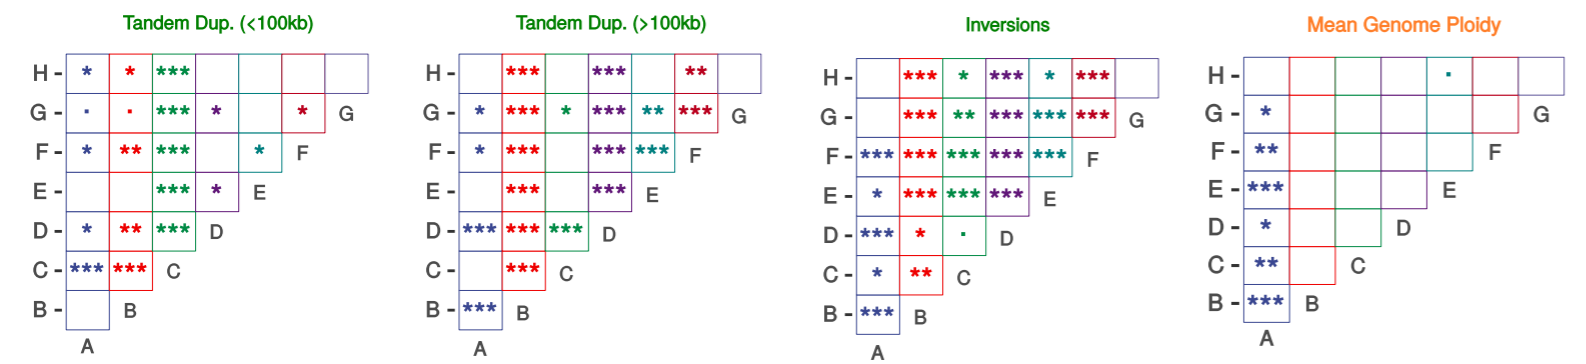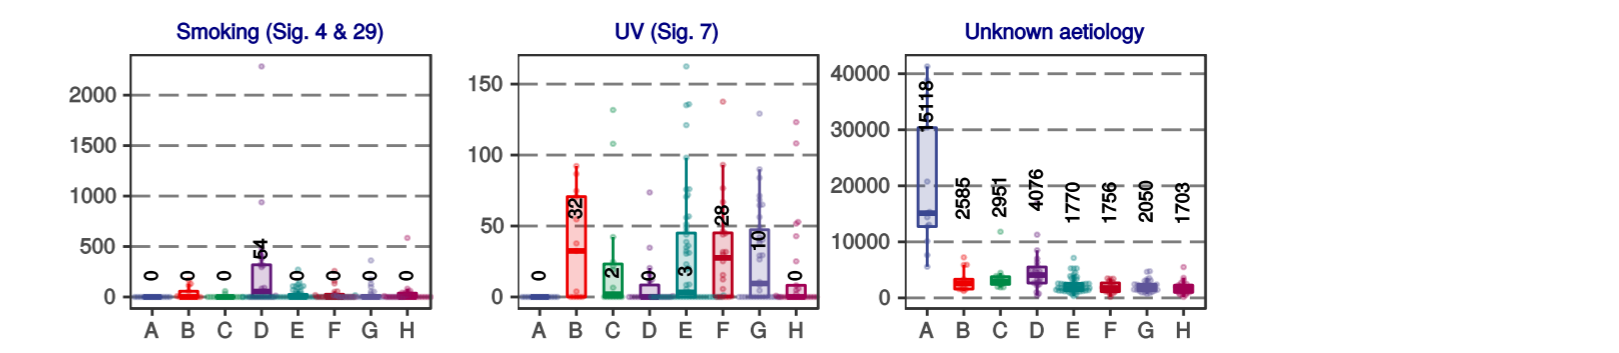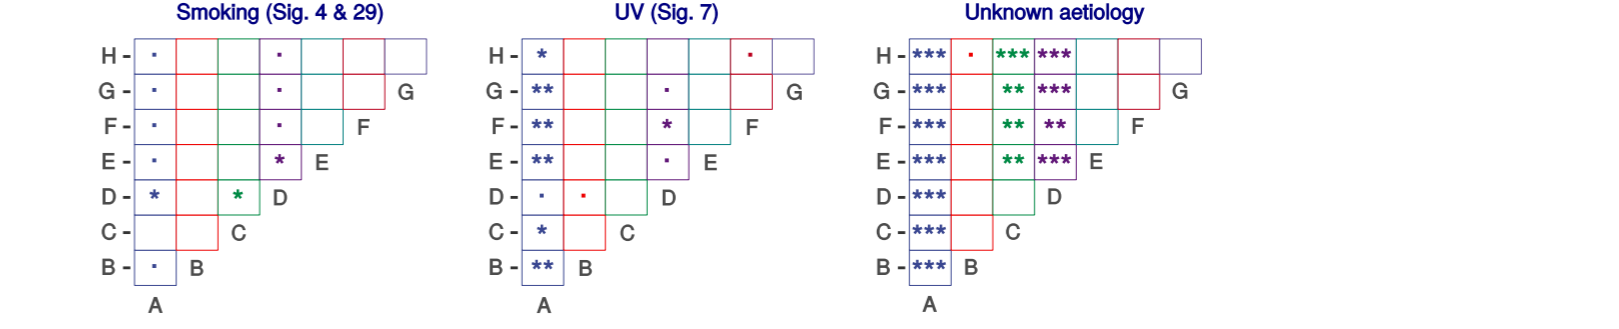

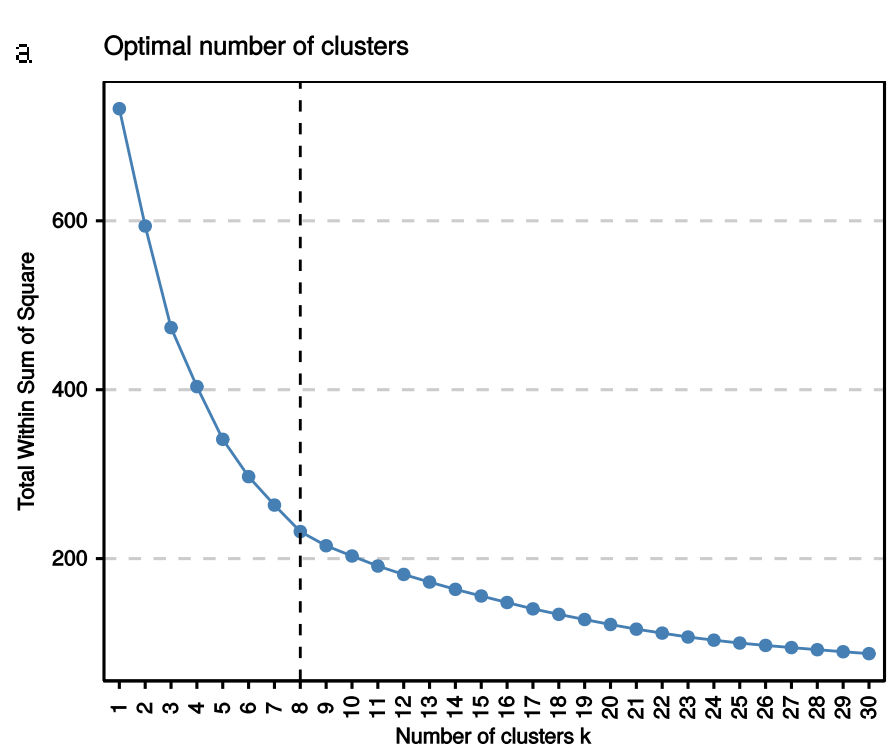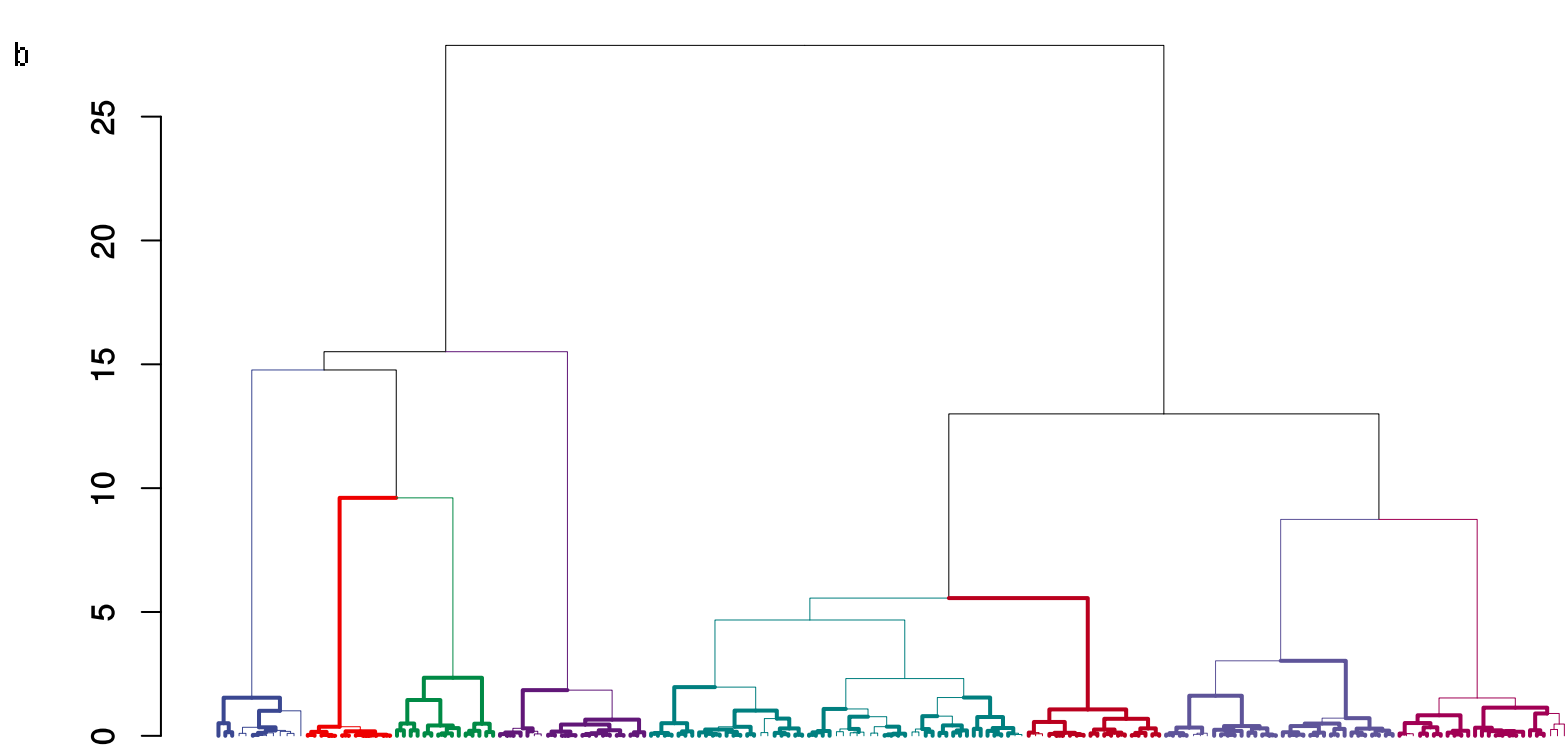

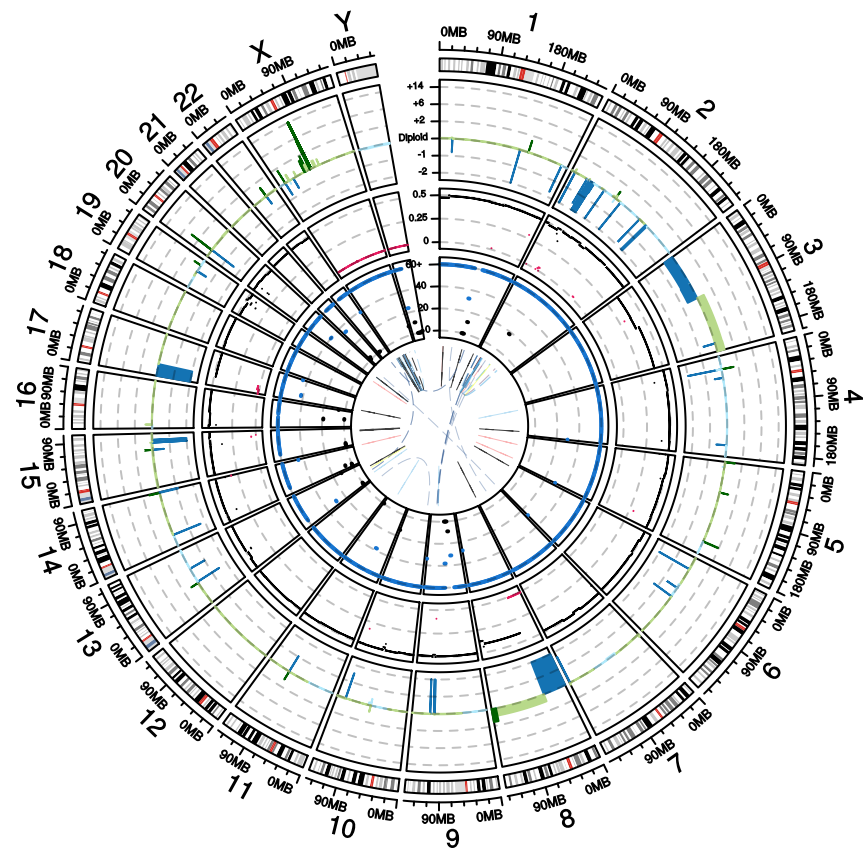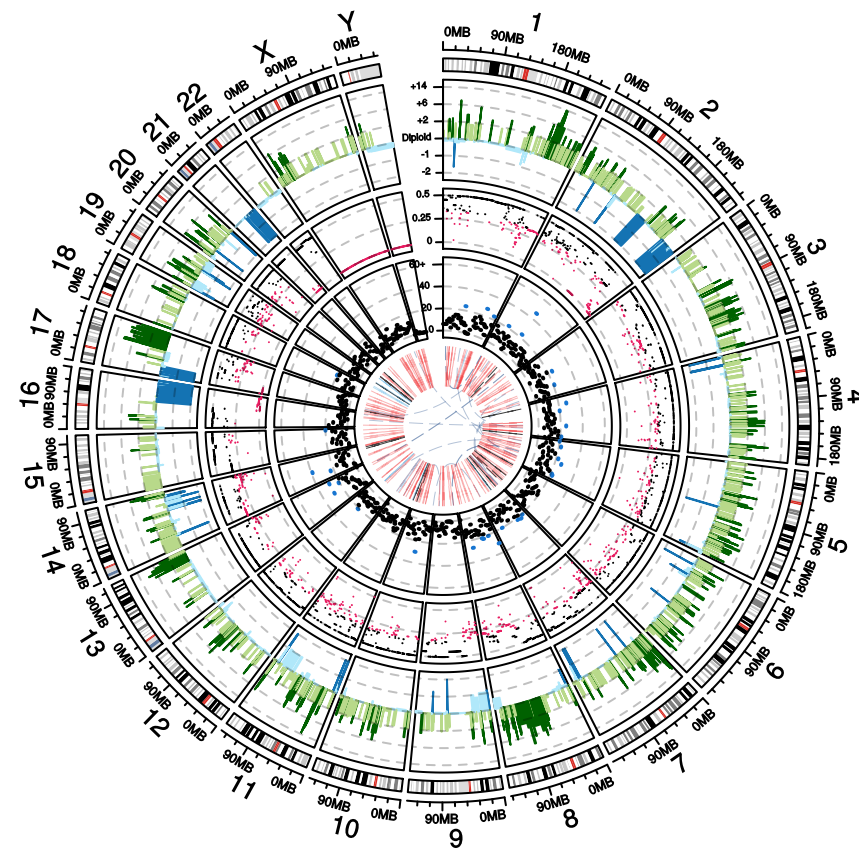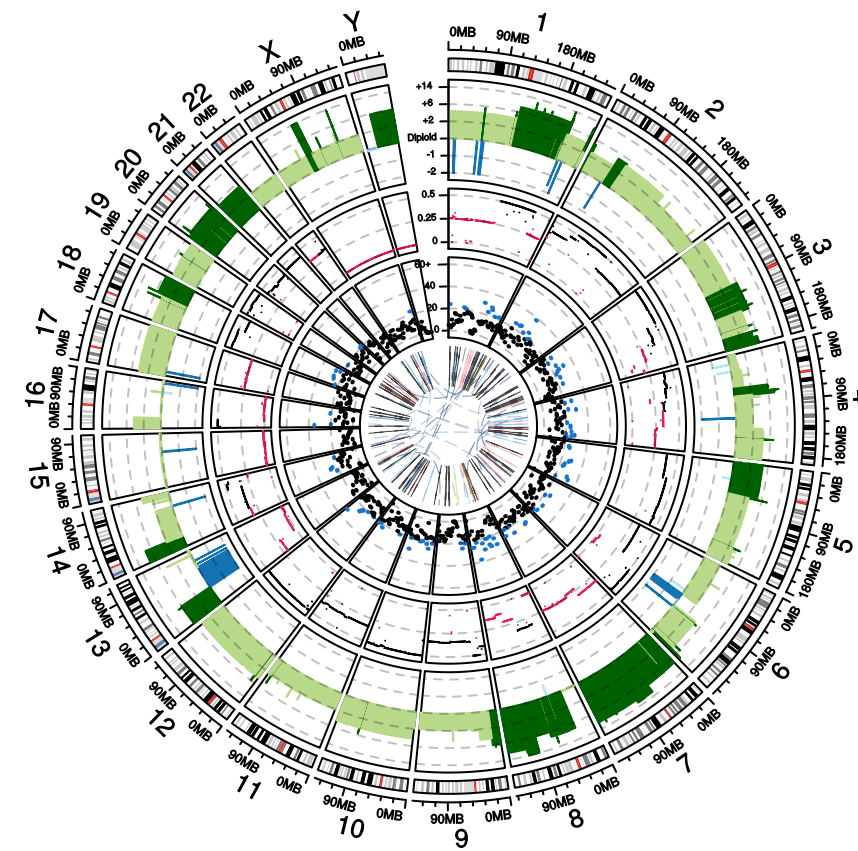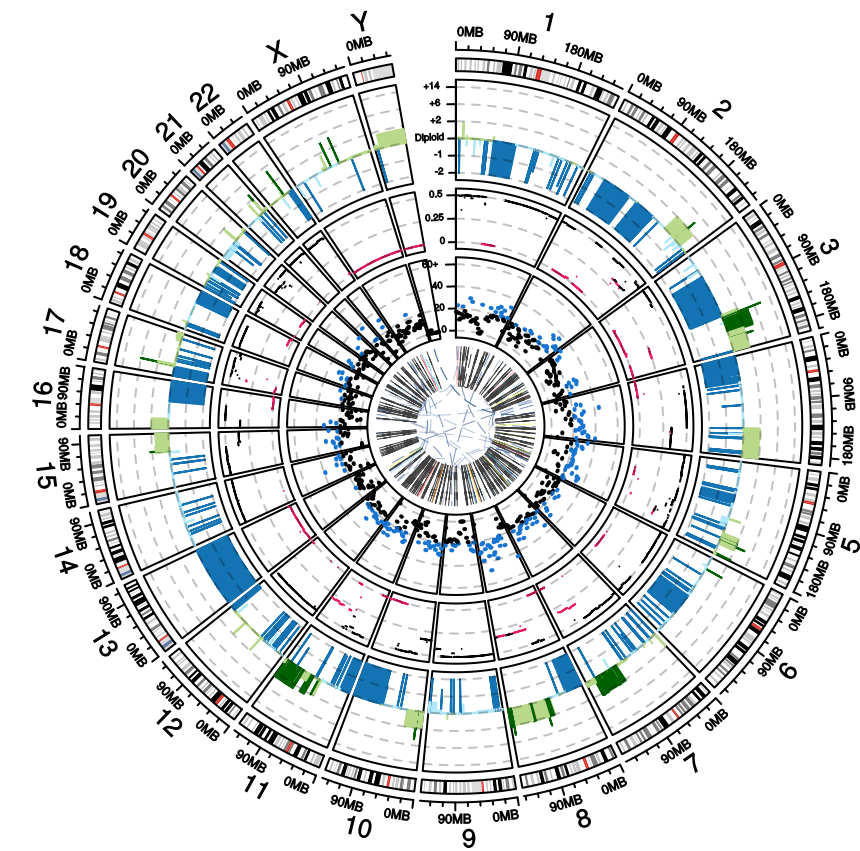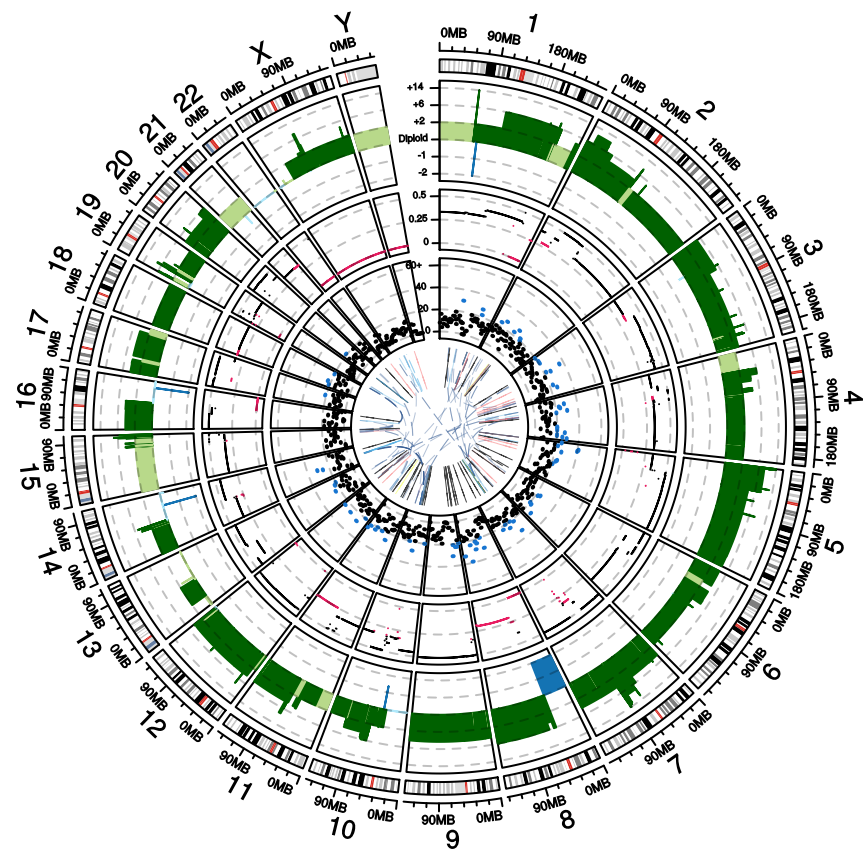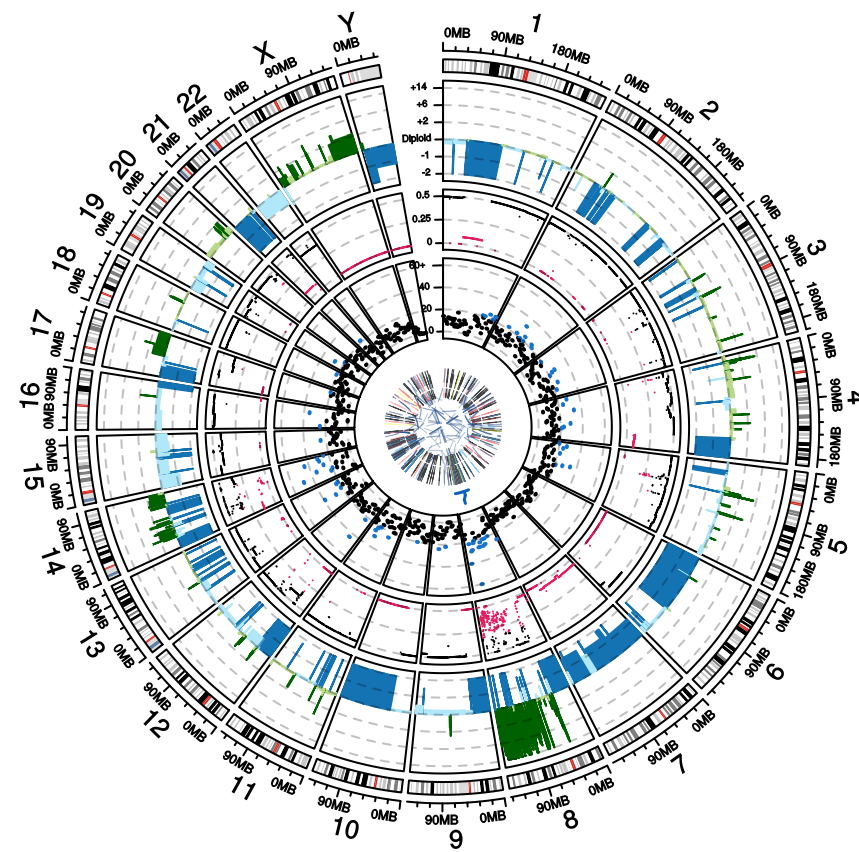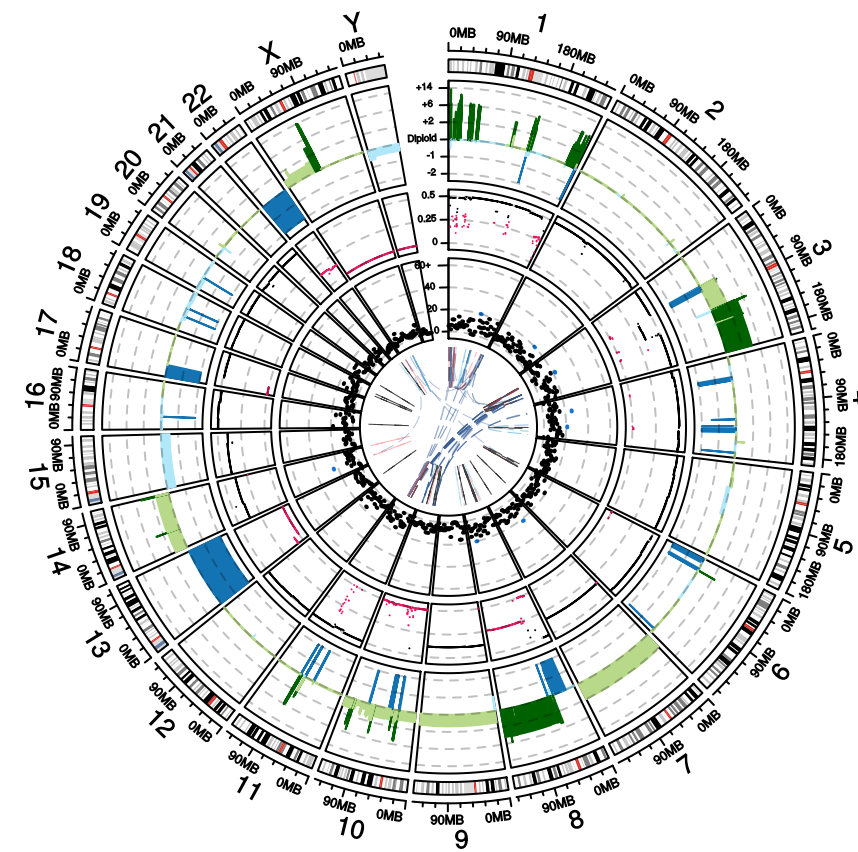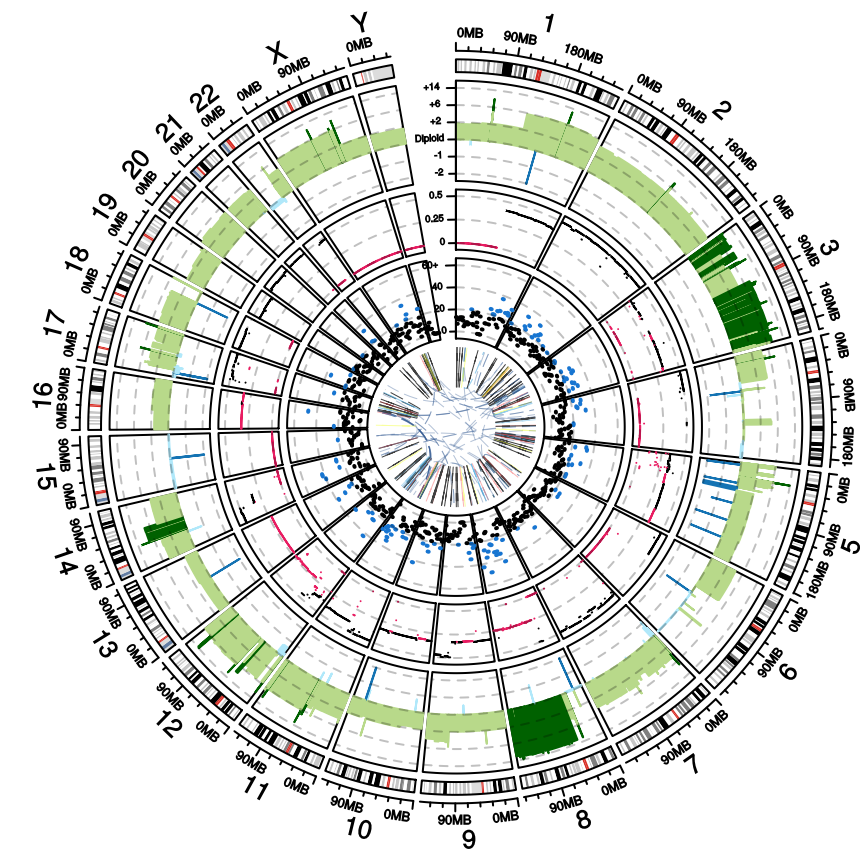



# Mutations BRCA2

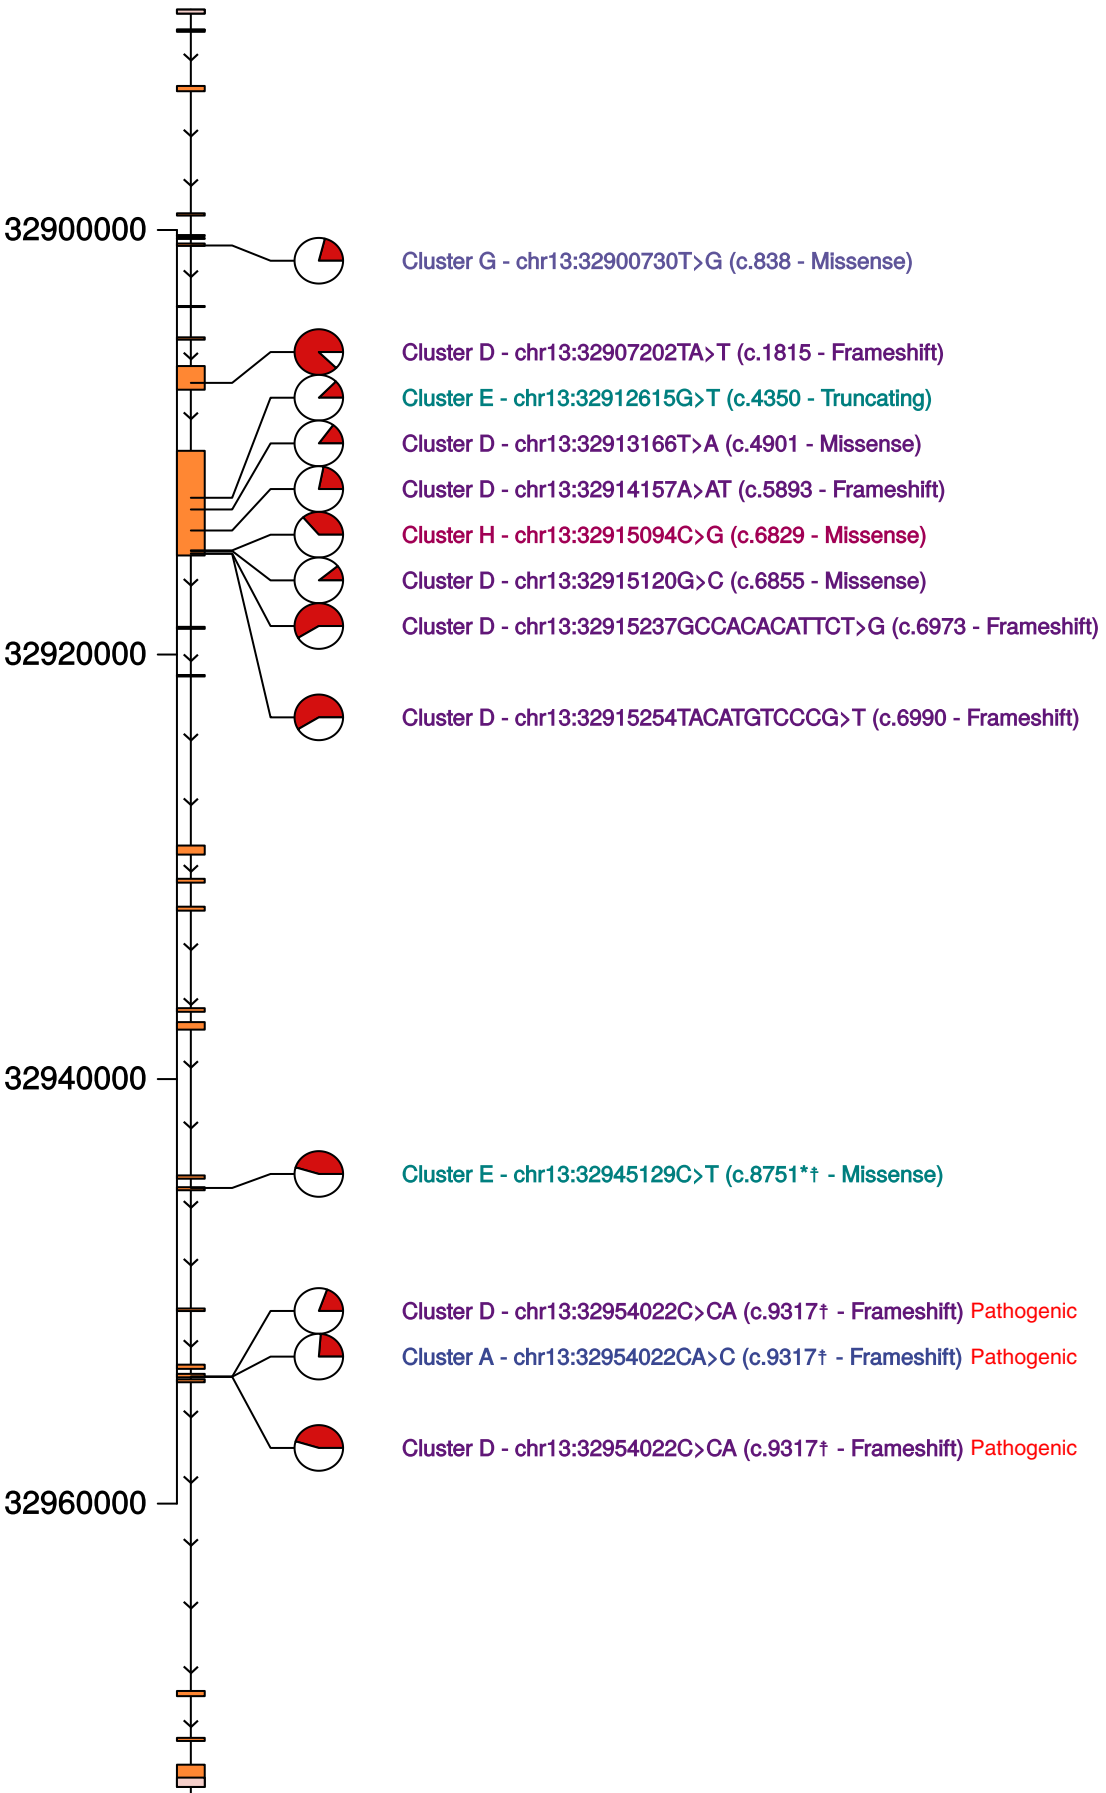

█ Exon     █ Frequency of variant allele  
█ UTR     █ Frequency of reference allele

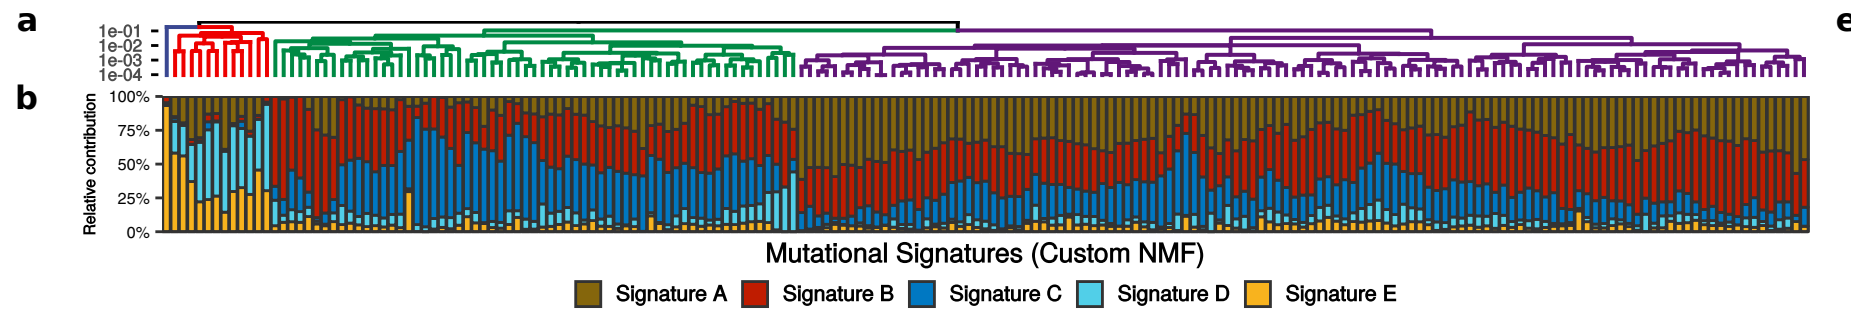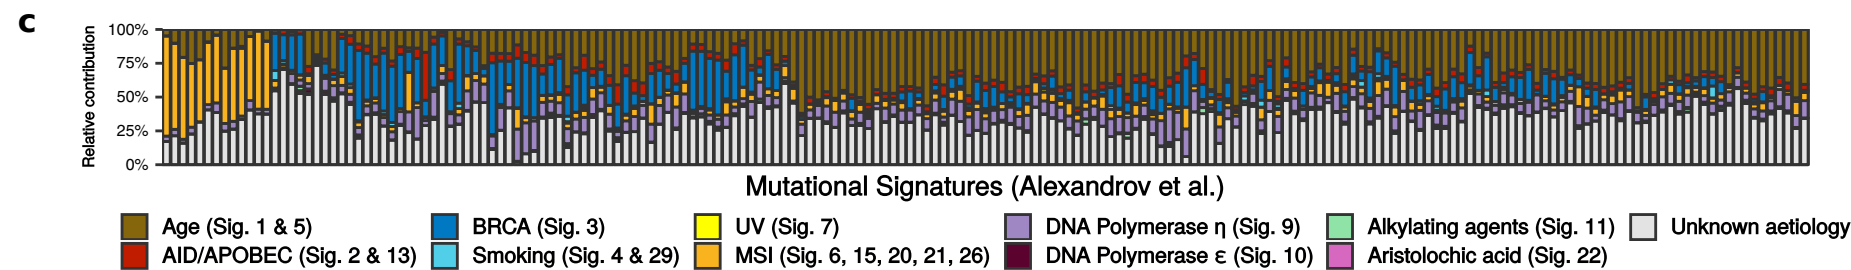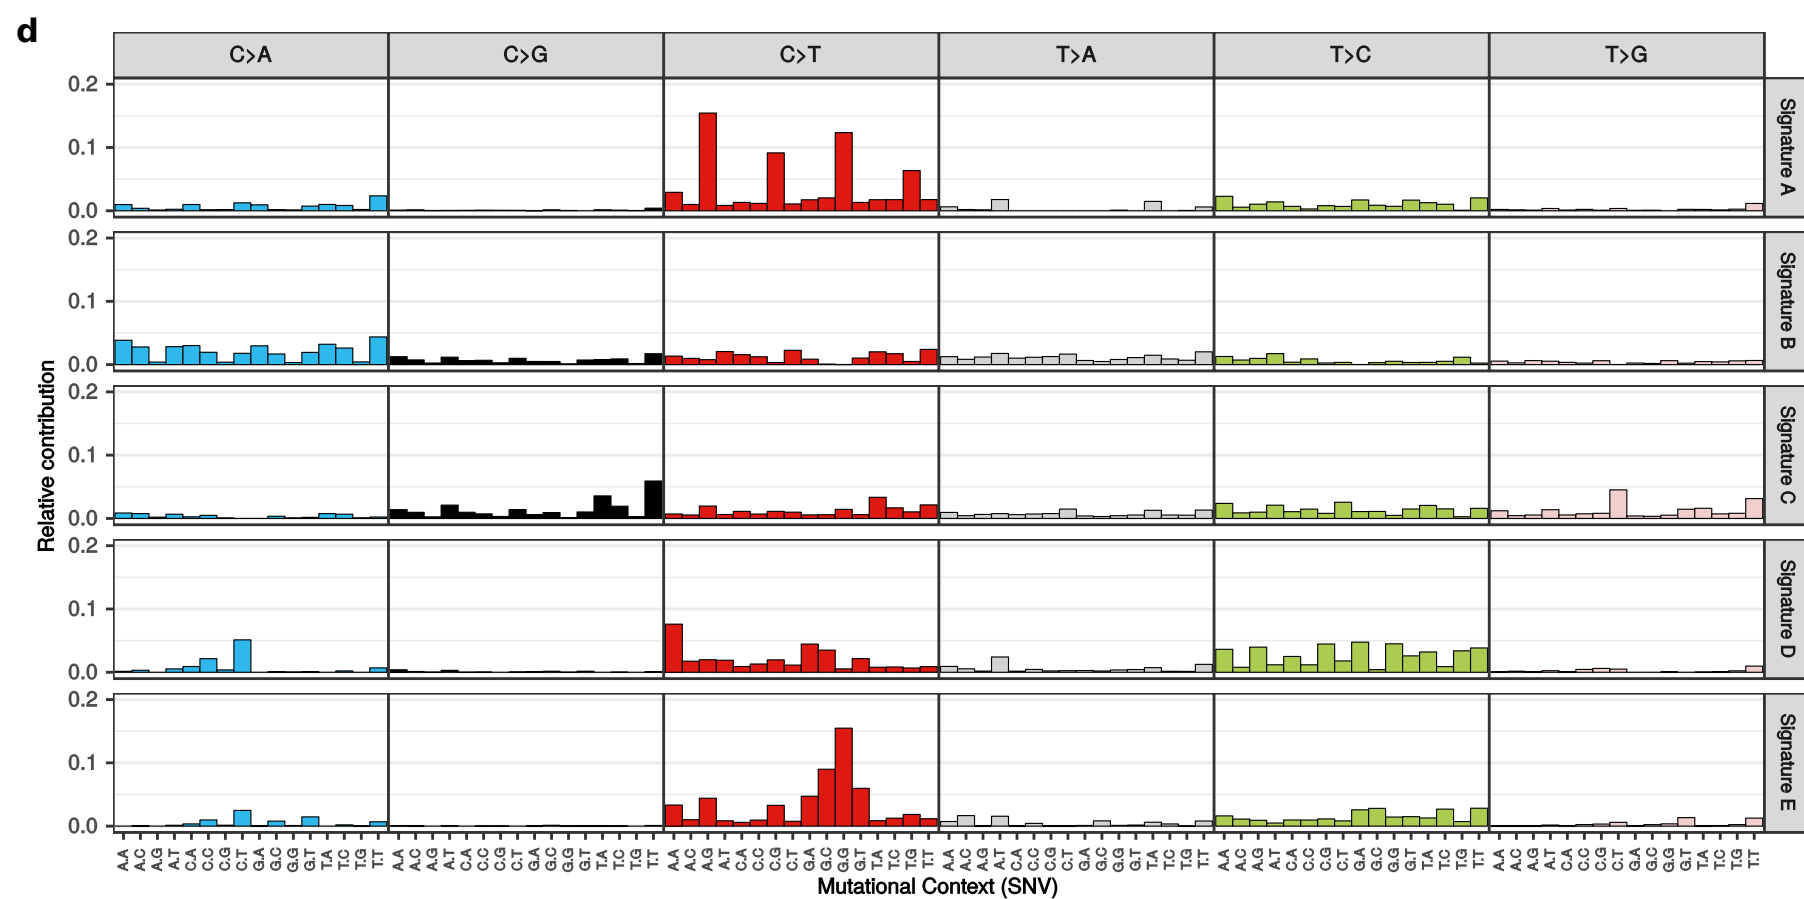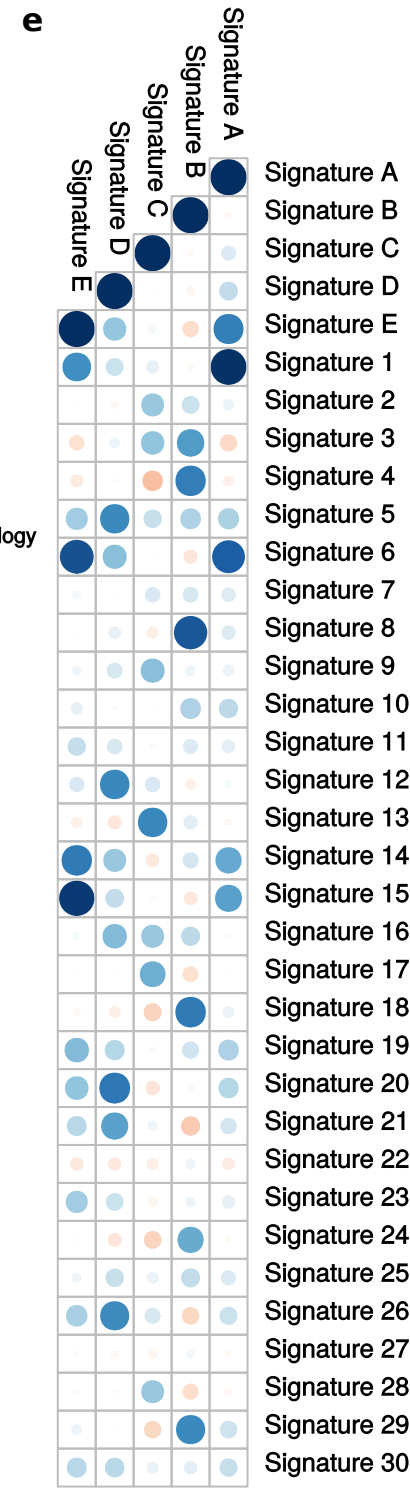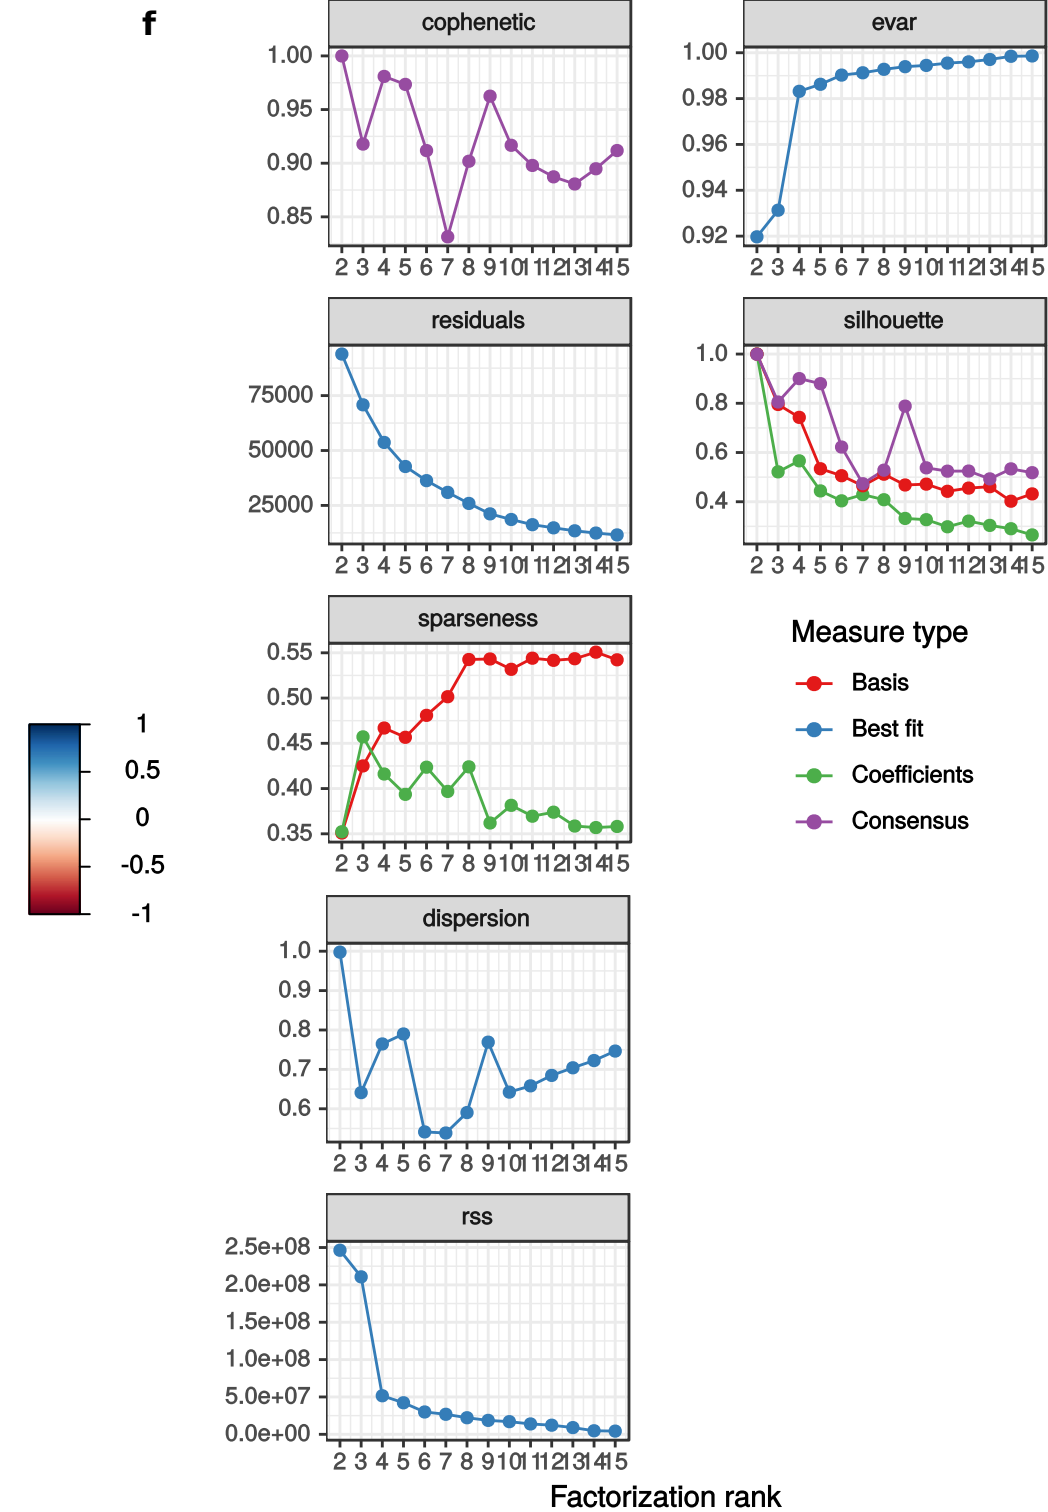

**Supplementary table 1: Participating centers**

| <b>Organization</b>                        | <b>Local principal investigator</b> |
|--------------------------------------------|-------------------------------------|
| Radboud UMC, Nijmegen                      | Carla van Herpen                    |
| Erasmus MC, Rotterdam                      | Martijn Lolkema                     |
| Franciscus Gasthuis & Vlietland, Rotterdam | Paul Hamberg                        |
| NKI-AVL, Amsterdam                         | Neeltje Steeghs                     |
| Isala, Zwolle                              | Jan Willen de Groot                 |
| Martini Ziekenhuis, Groningen              | Johan van Rooijen                   |
| Medisch Centrum Leeuwarden                 | Hiltje de Graaf                     |
| Maastricht UMC, Maastricht                 | Vivianne Tjan-Heijnen               |
| Noordwest Ziekenhuisgroep, Alkmaar         | Mathijs Hendriks                    |
| UMC Utrecht, Utrecht                       | Els Witteveen                       |
| Amphia Ziekenhuis, Breda                   | Bert Jan ten Tije                   |
| Reinier de Graaf Gasthuis, Delft           | Annelie Vulink                      |
| Treant Zorggroep, Hoogeveen                | Sophia van den Boogerd              |
| Zuyderland Medisch Centrum, Geleen         | Frans Erdkamp                       |
| ETZ Elisabeth, Tilburg                     | Laurens Beerepoot                   |
| Leids Universitair Medisch Centrum, Leiden | Hans Gelderblom                     |
| Maasstad Ziekenhuis, Rotterdam             | Rineke Leys                         |
| Meander Medisch Centrum, Amersfoort        | Haiko Bloemendal                    |
| St. Antonius Ziekenhuis, Utrecht           | Maartje Los                         |
| VUmc, Amsterdam                            | Henk Verheul                        |
| ZGT, Almelo                                | Esther Siemerink                    |

| <b>Included patients for this study (n)</b> |  |
|---------------------------------------------|--|
| 91                                          |  |
| 38                                          |  |
| 20                                          |  |
| 15                                          |  |
| 3                                           |  |
| 3                                           |  |
| 3                                           |  |
| 3                                           |  |
| 3                                           |  |
| 3                                           |  |
| 2                                           |  |
| 2                                           |  |
| 2                                           |  |
| 2                                           |  |
| 1                                           |  |
| 1                                           |  |
| 1                                           |  |
| 1                                           |  |
| 1                                           |  |
| 1                                           |  |
| 1                                           |  |

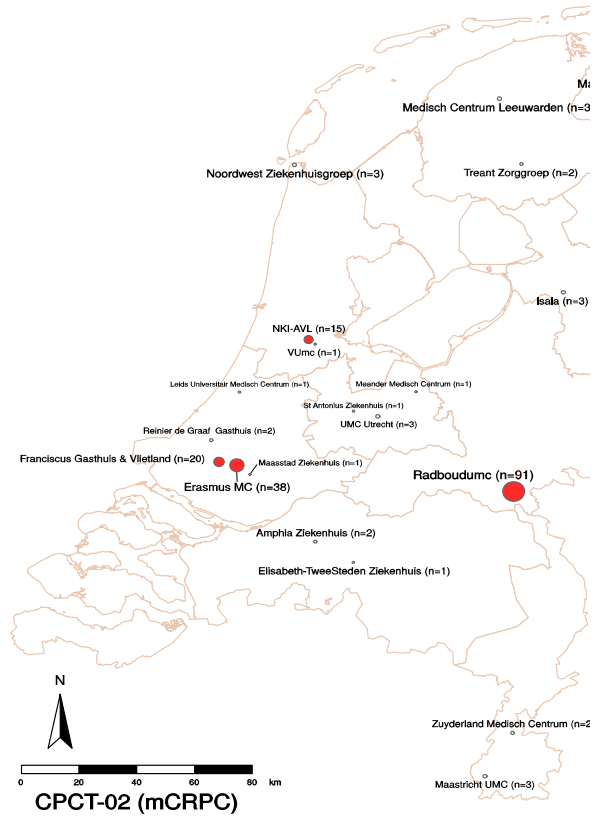

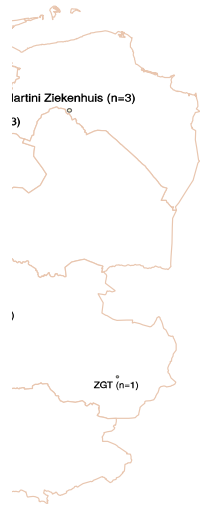

1)

2)

| <b>Supplementary table 2: Patient characteristics</b>                                    |          |          |
|------------------------------------------------------------------------------------------|----------|----------|
| <i>Patients (n=197)</i>                                                                  |          |          |
|                                                                                          | <b>n</b> | <b>%</b> |
| <b>Age at biopsy</b>                                                                     |          |          |
| Median                                                                                   | 68       |          |
| Range (min-max)                                                                          | 48-83    |          |
| <b>Prior ADT</b>                                                                         |          |          |
| Yes                                                                                      | 197      | 100.0    |
| Drug-based                                                                               | 181      | 91.9     |
| Surgery-based (orchiectomy)                                                              | 3        | 1.5      |
| With Docetaxel                                                                           | 6        | 3.0      |
| No clear documentation of ADT type                                                       | 7        | 3.6      |
| <b>Prior systemic therapy (other than ADT)</b>                                           |          |          |
| 0 previous treatments                                                                    | 27       | 13.7     |
| ≥ 1 previous treatments                                                                  | 170      | 86.3     |
| 1 previous treatment                                                                     | 45       | 22.8     |
| 2 previous treatments                                                                    | 69       | 35.0     |
| 3 previous treatments                                                                    | 31       | 15.7     |
| 4 previous treatments                                                                    | 19       | 9.6      |
| 5 previous treatments                                                                    | 6        | 3.0      |
| <b>Type of prior systemic therapy (other than ADT)</b>                                   |          |          |
| Hormonal therapy only                                                                    | 20       | 10.2     |
| Chemotherapy only                                                                        | 37       | 18.8     |
| Radionucleotide therapy only                                                             | 4        | 2.0      |
| Immunotherapy only (Dendritic cell therapy)                                              | 4        | 2.0      |
| Targeted therapy only                                                                    | 0        | 0.0      |
| Hormonal and chemotherapy                                                                | 68       | 34.5     |
| Hormonal and radionucleotide therapy                                                     | 3        | 1.5      |
| Chemotherapy and radionucleotide therapy                                                 | 3        | 1.5      |
| Hormonal and immunotherapy                                                               | 3        | 1.5      |
| Chemotherapy and immunotherapy                                                           | 3        | 1.5      |
| Hormonal, chemotherapy and radionucleotide therapy                                       | 15       | 7.6      |
| Hormonal, chemotherapy and immunotherapy                                                 | 4        | 2.0      |
| Hormonal, radionucleotide and immunotherapy                                              | 2        | 1.0      |
| Hormonal, chemotherapy and targeted therapy (Olaparib)                                   | 2        | 1.0      |
| Hormonal, chemotherapy, radionucleotide and immunotherapy                                | 1        | 0.5      |
| Unknown at time of analysis                                                              | 1        | 0.5      |
| <b>Prior radiotherapy</b>                                                                |          |          |
| Yes (curative radiotherapy of the prostate and/or palliative radiotherapy of metastases) | 117      | 59.4     |
| No                                                                                       | 77       | 39.1     |
| Unknown at time of analysis                                                              | 3        | 1.5      |
| <b>Started therapy after biopsy for whole-genome sequencing</b>                          |          |          |
| Yes                                                                                      | 138      | 70.1     |
| Hormonal therapy                                                                         | 53       | 26.9     |

|                                                                                     |    |      |
|-------------------------------------------------------------------------------------|----|------|
| Chemotherapy                                                                        | 56 | 28.4 |
| Radionucleotide therapy                                                             | 12 | 6.1  |
| Immunotherapy (Pembrolizumab)                                                       | 6  | 3.0  |
| Targeted therapy                                                                    | 3  | 1.5  |
| Combinational therapy                                                               | 6  | 3.0  |
| Other*                                                                              | 2  | 1.0  |
| No                                                                                  | 19 | 9.6  |
| Unknown at time of analysis                                                         | 40 | 20.3 |
| <b>Biopsy site</b>                                                                  |    |      |
| Liver                                                                               | 29 | 14.7 |
| Lymph node                                                                          | 81 | 41.1 |
| Bone                                                                                | 70 | 35.5 |
| Lung                                                                                | 3  | 1.5  |
| Soft tissue/Other**                                                                 | 14 | 7.1  |
| *Boneregulating agent                                                               |    |      |
| **Soft tissue/other: (sub)cutis, muscle, peritoneum, kidney, bladder, adrenal gland |    |      |

Sheet G - Exclusive mutations

| Gene     | Cluster   | mutationsInCluster | nomutationsInCluster | mutationsInOtherCluster |
|----------|-----------|--------------------|----------------------|-------------------------|
| CDK12    | Cluster B | 11                 | 2                    | 5                       |
| BRCA2    | Cluster D | 15                 | 7                    | 12                      |
| MSH6     | Cluster A | 9                  | 4                    | 4                       |
| Chromoth | Cluster F | 16                 | 4                    | 30                      |
| JAK1     | Cluster A | 9                  | 4                    | 11                      |
| FGF3     | Cluster B | 9                  | 4                    | 11                      |
| FGF4     | Cluster B | 9                  | 4                    | 11                      |
| MDM4     | Cluster B | 10                 | 3                    | 21                      |
| CIC      | Cluster A | 7                  | 6                    | 5                       |
| CCND1    | Cluster B | 9                  | 4                    | 16                      |
| EPAS1    | Cluster A | 7                  | 6                    | 6                       |
| MSH2     | Cluster A | 7                  | 6                    | 7                       |
| SLC45A3  | Cluster B | 9                  | 4                    | 18                      |
| FBXO11   | Cluster A | 6                  | 7                    | 5                       |
| ELK4     | Cluster B | 9                  | 4                    | 22                      |
| NSD1     | Cluster B | 6                  | 7                    | 6                       |
| BCL2L12  | Cluster B | 5                  | 8                    | 3                       |
| FGFR4    | Cluster B | 5                  | 8                    | 3                       |
| HIST2H2I | Cluster B | 8                  | 5                    | 18                      |
| ASXL1    | Cluster A | 7                  | 6                    | 12                      |
| SIX2     | Cluster A | 6                  | 7                    | 7                       |
| ZFP36L2  | Cluster A | 8                  | 5                    | 19                      |
| NBN      | Cluster B | 11                 | 2                    | 48                      |
| ARID1A   | Cluster A | 6                  | 7                    | 8                       |
| ERF      | Cluster A | 6                  | 7                    | 8                       |
| MLH1     | Cluster A | 6                  | 7                    | 8                       |
| CNTNAP2  | Cluster B | 9                  | 4                    | 28                      |
| POTEE    | Cluster A | 5                  | 8                    | 4                       |
| SETD1B   | Cluster A | 7                  | 6                    | 14                      |
| TBX3     | Cluster B | 6                  | 7                    | 9                       |
| FRS2     | Cluster B | 7                  | 6                    | 15                      |
| ACVR1    | Cluster A | 5                  | 8                    | 5                       |
| CHD2     | Cluster A | 5                  | 8                    | 5                       |
| KMT2B    | Cluster A | 5                  | 8                    | 5                       |
| PBRM1    | Cluster A | 5                  | 8                    | 5                       |
| ZFH3     | Cluster A | 9                  | 4                    | 31                      |
| ECT2L    | Cluster B | 5                  | 8                    | 5                       |
| PCBP1    | Cluster A | 4                  | 9                    | 2                       |
| IDH2     | Cluster B | 4                  | 9                    | 2                       |
| BCL11A   | Cluster A | 6                  | 7                    | 11                      |
| TCF7L2   | Cluster A | 5                  | 8                    | 6                       |
| CDK4     | Cluster B | 5                  | 8                    | 6                       |
| IL2      | Cluster B | 5                  | 8                    | 6                       |
| RAB35    | Cluster B | 5                  | 8                    | 6                       |
| KMT2C    | Cluster A | 8                  | 5                    | 26                      |
| EML4     | Cluster A | 6                  | 7                    | 12                      |
| KMT2D    | Cluster A | 6                  | 7                    | 12                      |
| ACVR2A   | Cluster A | 5                  | 8                    | 7                       |
| BAX      | Cluster B | 5                  | 8                    | 7                       |
| EREG     | Cluster B | 5                  | 8                    | 7                       |



Sheet G - Exclusive mutations

| nomutationsInOtherCluster | p        | p.adj    |                               |
|---------------------------|----------|----------|-------------------------------|
| 179                       | 9.91E-13 | 7.29E-09 |                               |
| 163                       | 1.63E-10 | 5.99E-07 |                               |
| 180                       | 4.62E-10 | 1.13E-06 |                               |
| 147                       | 1.84E-08 | 3.39E-05 |                               |
| 173                       | 9.44E-08 | 9.93E-05 | <b>Test used:</b>             |
| 173                       | 9.44E-08 | 9.93E-05 | Two-sided Fisher's Exact Test |
| 173                       | 9.44E-08 | 9.93E-05 |                               |
| 163                       | 4.77E-07 | 4.39E-04 |                               |
| 179                       | 5.75E-07 | 4.70E-04 |                               |
| 168                       | 1.04E-06 | 7.63E-04 |                               |
| 178                       | 1.21E-06 | 8.10E-04 |                               |
| 177                       | 2.35E-06 | 1.33E-03 |                               |
| 166                       | 2.28E-06 | 1.33E-03 |                               |
| 179                       | 8.98E-06 | 4.42E-03 |                               |
| 162                       | 9.00E-06 | 4.42E-03 |                               |
| 178                       | 1.74E-05 | 8.00E-03 |                               |
| 181                       | 2.76E-05 | 1.07E-02 |                               |
| 181                       | 2.76E-05 | 1.07E-02 |                               |
| 166                       | 2.64E-05 | 1.07E-02 |                               |
| 172                       | 2.99E-05 | 1.09E-02 |                               |
| 177                       | 3.12E-05 | 1.09E-02 |                               |
| 165                       | 3.66E-05 | 1.22E-02 |                               |
| 136                       | 3.89E-05 | 1.24E-02 |                               |
| 176                       | 5.29E-05 | 1.44E-02 |                               |
| 176                       | 5.29E-05 | 1.44E-02 |                               |
| 176                       | 5.29E-05 | 1.44E-02 |                               |
| 156                       | 4.87E-05 | 1.44E-02 |                               |
| 180                       | 5.99E-05 | 1.57E-02 |                               |
| 170                       | 6.50E-05 | 1.65E-02 |                               |
| 175                       | 8.53E-05 | 2.09E-02 |                               |
| 169                       | 9.25E-05 | 2.20E-02 |                               |
| 179                       | 1.16E-04 | 2.30E-02 |                               |
| 179                       | 1.16E-04 | 2.30E-02 |                               |
| 179                       | 1.16E-04 | 2.30E-02 |                               |
| 179                       | 1.16E-04 | 2.30E-02 |                               |
| 153                       | 1.00E-04 | 2.30E-02 |                               |
| 179                       | 1.16E-04 | 2.30E-02 |                               |
| 182                       | 1.63E-04 | 3.08E-02 |                               |
| 182                       | 1.63E-04 | 3.08E-02 |                               |
| 173                       | 1.97E-04 | 3.42E-02 |                               |
| 178                       | 2.04E-04 | 3.42E-02 |                               |
| 178                       | 2.04E-04 | 3.42E-02 |                               |
| 178                       | 2.04E-04 | 3.42E-02 |                               |
| 178                       | 2.04E-04 | 3.42E-02 |                               |
| 158                       | 2.49E-04 | 4.07E-02 |                               |
| 172                       | 2.86E-04 | 4.49E-02 |                               |
| 172                       | 2.86E-04 | 4.49E-02 |                               |
| 177                       | 3.38E-04 | 4.97E-02 |                               |
| 177                       | 3.38E-04 | 4.97E-02 |                               |
| 177                       | 3.38E-04 | 4.97E-02 |                               |
